# Supplementary material for: A new Aura virus isolate in Brazil shows segment duplication in the variable region of the nsP3 gene
Source: PubMed Central journal article supplement (PMC5975265; doi:10.1186/s13071-018-2907-4), 2018-05-29
Supplement: 13071_2018_2907_MOESM1_ESM.pdf [file 13071_2018_2907_MOESM1_ESM.pdf]

530 540 550 560

AF126284  
BR/P05  
GGTATCAGTTATGCAAAATGTGTATATCAATGCACCTTCG  
G G

570 580 590 600

AF126284  
BR/P05  
ACCATTTACCATCAGGCCCTAAAGGGAGTCAGAAAACGTG  
T

610 620 630 640

AF126284  
BR/P05  
ATTGGATCGGGTTTCGATCAACGCAGTTTATGTTCTCCTC  
T

650 660 670 680

AF126284  
BR/P05  
GATGGCAGGGTCGTATCCGTCCTACAATACTAATTGGGCC  
C

690 700 710 720

AF126284  
BR/P05  
GATGAAGGGTGCTGGAAAGCGCGTAATATAGGCCCTATGTA  
A

730 740 750 760

AF126284  
BR/P05  
GCACGAAGCTGAGAGAGGGTACGATGGGCAAACTGTCTAC  
C T

770 780 790 800

AF126284  
BR/P05  
CTTCCGGAAAAGGCCTTGAACCTGGAACTAACGTGTAC  
C G

810 820 830 840

AF126284  
BR/P05  
TTCTCTGTCGGTTTCGACACTCTACCCTGAGAAATAGAGCGG  
G

850 860 870 880

AF126284  
BR/P05  
ACCTGCAGAGTTGGCACCTACCATCTGTGTTCCACTTCAA  
A

890 900 910 920

AF126284  
BR/P05  
AGGTAAACAATCCTTTACGTGCCGCTGTGTATACGGCGGTT  
T

930 940 950 960

AF126284  
BR/P05  
AACTGCGAAGGATACGTAGTCAAGAAGATCACCATCAGCC  
C

970 980 990 1000

AF126284  
BR/P05  
CCGGGATCACGGGGCGTGTCAATCGGTACACTGTGACTAA  
G C G

1010 1020 1030 1040

AF126284  
BR/P05  
CAACAGCGAGGGATTCTTGTGTGTAAGATCACAGATACG  
G

1050 1060 1070 1080  
AF126284  
BR/P05  
G T C A A A G G G G A G C G T G T A T C G T T C C C T G T C T G T A C G T A T A

1090 1100 1110 1120  
AF126284  
BR/P05  
T T C C A C C T T C A A T C T G T G A C C A A A T G A C A G G T A T A T T G G C

1130 1140 1150 1160  
AF126284  
BR/P05  
C A C T G A T A T C C A A C C C G A A G A C G C G C A A A A G T T G C T G G T A

1170 1180 1190 1200  
AF126284  
BR/P05  
G G A C T G A A C C A A C G C A T A G T C G T G A A C G G A A A A A C T A A T A

1210 1220 1230 1240  
AF126284  
BR/P05  
G A A A C A C C A A C A C G A T G C A G A A C T A T C T C C T G C C C G C G G T  
G

1250 1260 1270 1280  
AF126284  
BR/P05  
G G C T A C A G G T C T G A G T A A A T G G G C C A A A G A A A G A A A G G C A

1290 1300 1310 1320  
AF126284  
BR/P05  
G A C T G C A G T G A C G A G A A A C C A T T G A A T G T G A G A G A A C G C A  
G C . G A . G

1330 1340 1350 1360  
AF126284  
BR/P05  
A A C T A G C T T T C G G T T G C C T A T G G G C T T T C A A G A C C A A G A A

1370 1380 1390 1400  
AF126284  
BR/P05  
G A T C C A T T C T T T T T A C C G C C C G C C A G G C A C G C A G A C T A T A

1410 1420 1430 1440  
AF126284  
BR/P05  
G T A A A A G T C G C A G C G G A A T T C A G T G C G T T C C C T A T G T C C T

1450 1460 1470 1480  
AF126284  
BR/P05  
C G G T G T G G A C T A C G T C A C T G C C A A T G T C A C T G A G A C A G A A

1490 1500 1510 1520  
AF126284  
BR/P05  
A G T T A A A C T G C T T C T T G T A A A G A A A C C A A T A A A C C G G T A

1530 1540 1550 1560  
AF126284  
BR/P05  
G T C A C T A T T A C T G A C A C T G C G G T A A A A A A C G C A C A A G A G G  
A

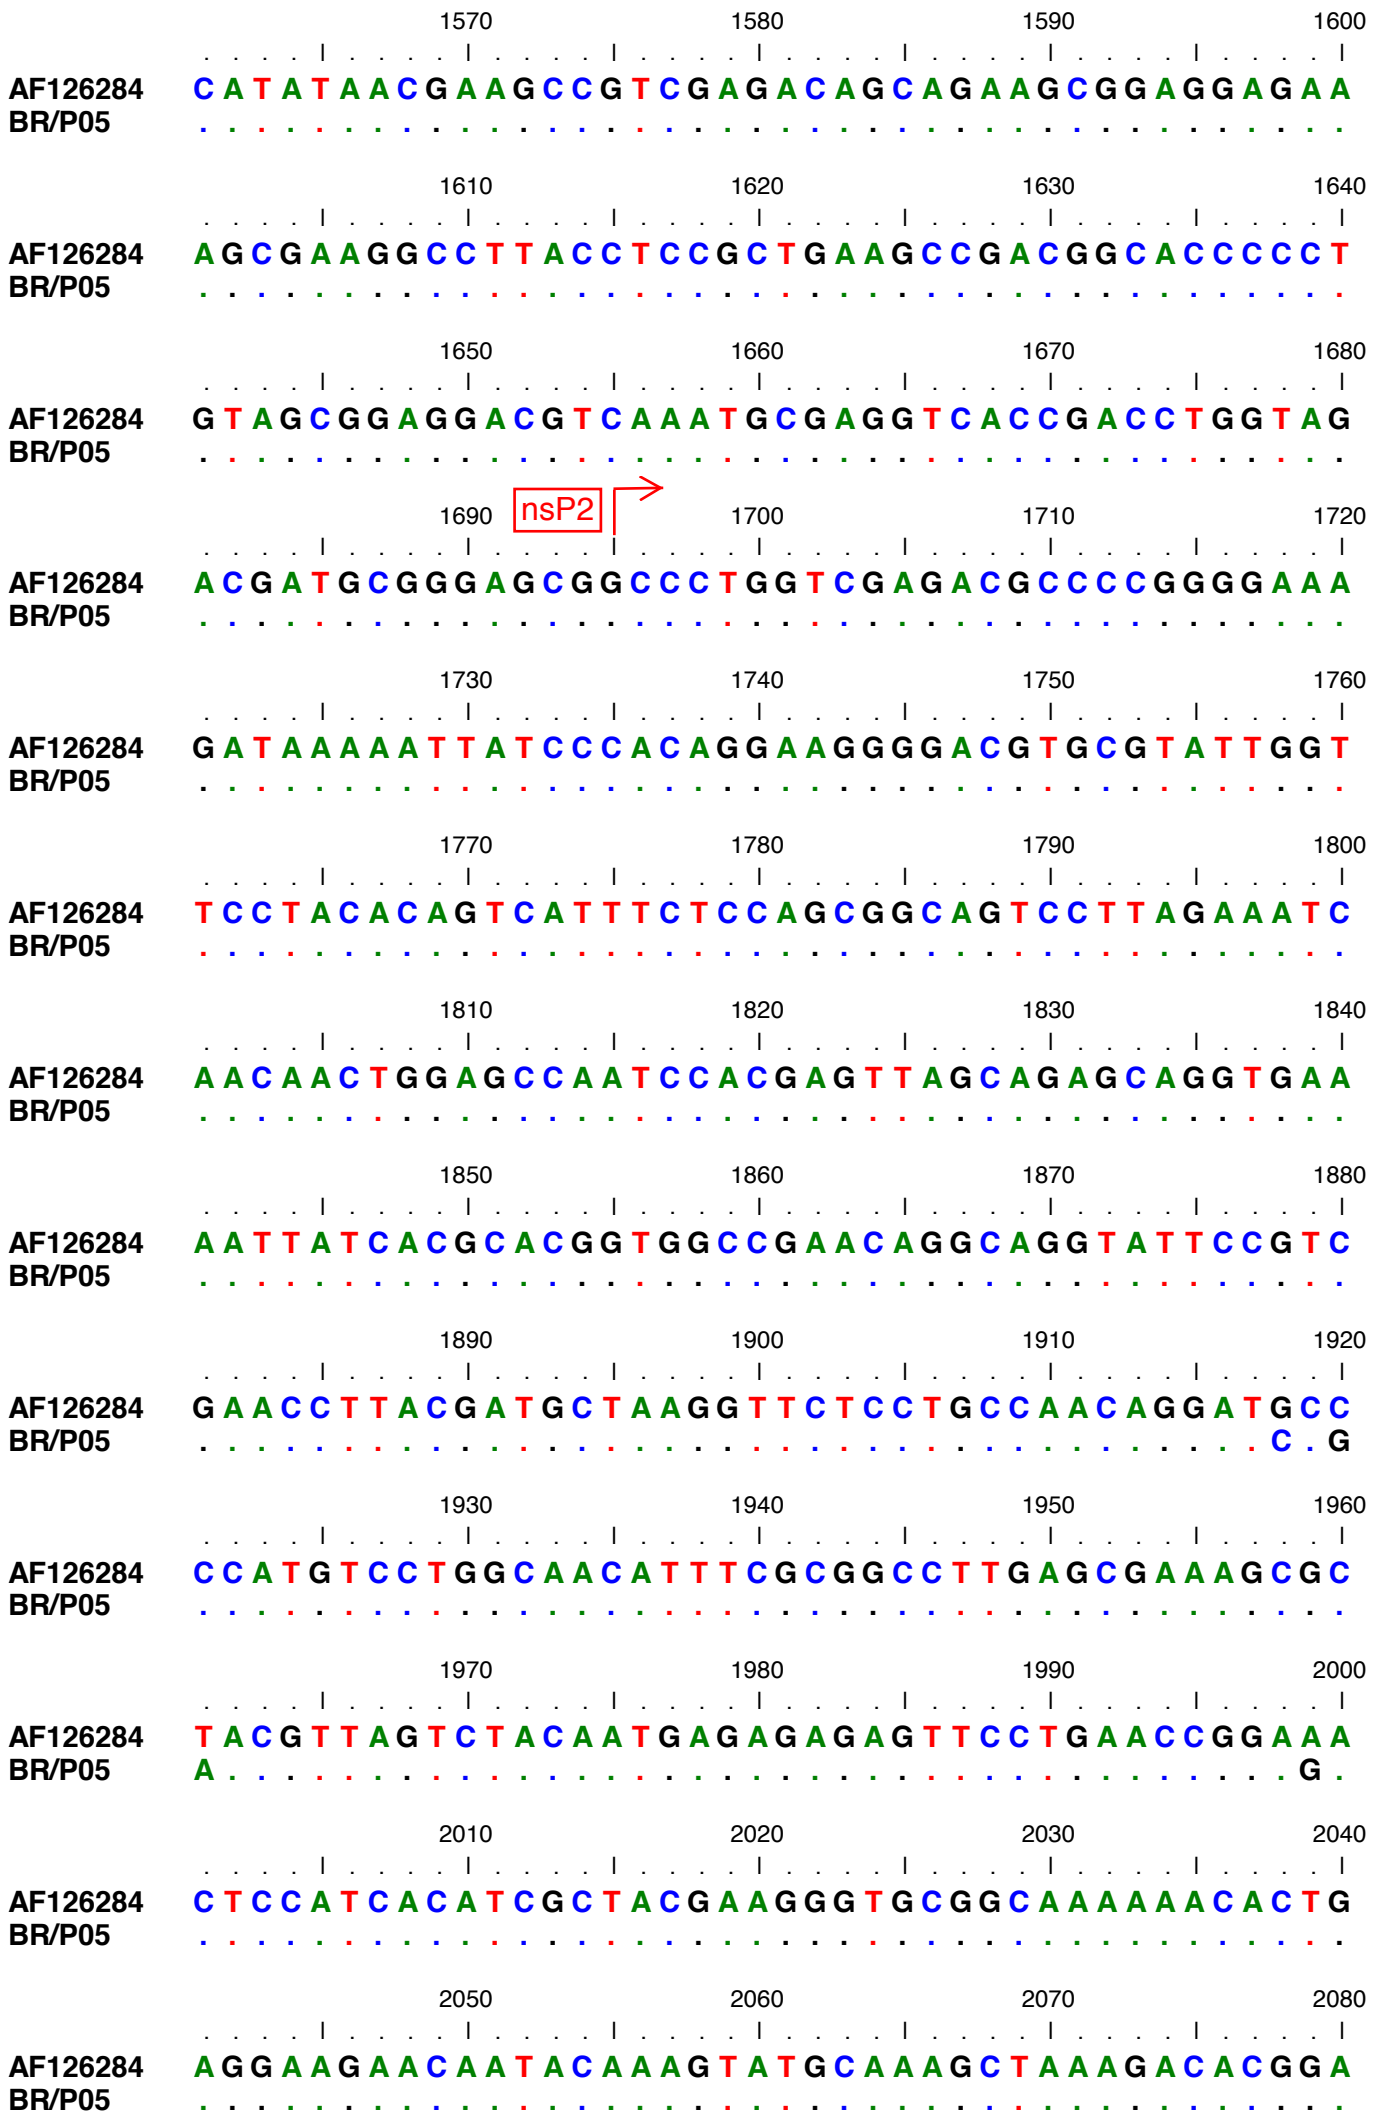

AF126284 BR/P05  
 2090 2100 2110 2120  
 T C A T G A G T A C G T A T A C G A C G T A G A T G C C A G A A A T G C G T A

AF126284 BR/P05  
 2130 2140 2150 2160  
 A A A A G A G A G C A T G C A C A A G G G C T A G T A C T A G T T G G G G A A C

AF126284 BR/P05  
 2170 2180 2190 2200  
 T A A C T A A T C C G C C T T A C C A C G A G C T G G C A T A C G A A G G A T T

AF126284 BR/P05  
 2210 2220 2230 2240  
 A C G T A C A C G A C C C G C T G C C C C T T A C C A T A T C G A A A C A C T G

AF126284 BR/P05  
 2250 2260 2270 2280  
 G G G G T C A T T G G A A C A C C G G G T C A G G T A A G T C G G C C A T C A

AF126284 BR/P05  
 2290 2300 2310 2320  
 T A A A A T C T A C G G T A A C A C T A A A A G A C C T C G T A A C T A G C G G

AF126284 BR/P05  
 2330 2340 2350 2360  
 T A A G A A A G A A A A T T G C A A A G A A A T A G A G A A T G A C G T C C A G  
 G

AF126284 BR/P05  
 2370 2380 2390 2400  
 A A A A T G C G G G G A A T G A C T A T A G C T A C G A G A A C G G T A G A C T

AF126284 BR/P05  
 2410 2420 2430 2440  
 C G G T A C T T C T T A A T G G A T G G A A G A A A G C A G T A G A C G T C C T

AF126284 BR/P05  
 2450 2460 2470 2480  
 A T A T G T G G A T G A A G C G T T T G C A T G T C A T G C A G G C A C C T T A

AF126284 BR/P05  
 2490 2500 2510 2520  
 A T G G C A T T G A T T G C C A T T G T C A A A C C G A G A C G T A A A G T A G

AF126284 BR/P05  
 2530 2540 2550 2560  
 T A C T G T G C G G C G A C C C G A A G C A G T G G C C C T T C T T T A A T T T  
 T C G G

AF126284 BR/P05  
 2570 2580 2590 2600  
 A A T G C A A C T G A A G G T A A A C T T C A A C A A C C C G A G C G A G A C

2610 2620 2630 2640  
 AF126284  
 BR/P05  
 C T G T G T A C T T C C A C C C A T T A T A A A T A T A T C T C T C G C A G G T

2650 2660 2670 2680  
 AF126284  
 BR/P05  
 G C A C C C A A C C T G T T A C A G C C A T A G T G T C T A C A T T A C A C T A

2690 2700 2710 2720  
 AF126284  
 BR/P05  
 T G A C G G A A A G A T G A G G A C T A C G A A T C C C T G C A A A A G G G G C T

2730 2740 2750 2760  
 AF126284  
 BR/P05  
 A T C G A A A T A G A C G T A A A C G G A T C G A C T A A G C C C A A G A A A G

2770 2780 2790 2800  
 AF126284  
 BR/P05  
 G A G A C A T A G T G T T G A C G T G T T T C C G T G G G T G G G T T A A G C A  
 . C .

2810 2820 2830 2840  
 AF126284  
 BR/P05  
 G G G G C A A A T C G A T T A C C C C G G A C C C G G A G G T C A T G A C C G T  
 . C T C . . . . . A . . . . . A G . T C A T G A C . G C .

2850 2860 2870 2880  
 AF126284  
 BR/P05  
 G C A G C T T C T C A A G G G C T A A C C A G A A G G G G C G T T T A T G C G G  
 . . . . . G . A . . . . .

2890 2900 2910 2920  
 AF126284  
 BR/P05  
 T C A G A C A G A A A G T A A A T G A A A C C C A C T A T A T G C A G A G A A

2930 2940 2950 2960  
 AF126284  
 BR/P05  
 G T C A G A A C A C G T T A A C G T G T T A C T T A C T A G G A C G G A A G A T

2970 2980 2990 3000  
 AF126284  
 BR/P05  
 C G C A T A G T G T G G A A G A C A C T G C A A G G G G A T C C T T T G G A T T A  
 . . . . . C . . . . .

3010 3020 3030 3040  
 AF126284  
 BR/P05  
 A G T A C C T C A C T A A C G T T C C A A A A G G G A A C T T T A C A G C C A C

3050 3060 3070 3080  
 AF126284  
 BR/P05  
 T T T A G A A G A A T G G C A G G C G G A A C A C G A G G A C A T T A T G A A G

3090 3100 3110 3120  
 AF126284  
 BR/P05  
 G C C A T T A A T T C T A C A T C C A C A G T A T C T G A C C C T T T C G C C A  
 . . . . . C . . . . .



AF126284 BR/P05  
 3650 3660 3670 3680  
 T A A G G A A A C A T G C T A T T G C G T G T C C A A G C G A A T C A C A T G G

AF126284 BR/P05  
 3690 3700 3710 3720  
 G T C G C T C C G C T G G G A G T C A G A G G A G C T G A C C A C A A C C A T G

AF126284 BR/P05  
 3730 3740 3750 3760  
 A C C T G C A T T T C G G G T T C C C A C C A C T G T C C A G A T A C G A C C T

AF126284 BR/P05  
 3770 3780 3790 3800  
 T G T G G T G G T T A A T A T G G G A C A A C C G T A C A G G T T C C A T C A C  
 A C A C

AF126284 BR/P05  
 3810 3820 3830 3840  
 T A C C A G C A G T G C G A G G A G C A T G C C G G C C T C A T G A G G A C G T

AF126284 BR/P05  
 3850 3860 3870 3880  
 T G G C C C G G T C A G C A C T C A A C T G C C T A A A A C C A G G A G G A A C  
 T T

AF126284 BR/P05  
 3890 3900 3910 3920  
 A T T A G C C C T G A A A G C A T A T G G T T T C G C C G A C T C C A A T A G T

AF126284 BR/P05  
 3930 3940 3950 3960  
 G A G G A C G T T G T T C T G T C T T T A G C G A G G A A A T T C G T G C G G G  
 C

AF126284 BR/P05  
 3970 3980 3990 4000  
 C A T C C G C A G T G A G A C C A T C G T G T A C A C A G T T T A A C A C A G A  
 T

AF126284 BR/P05  
 4010 4020 4030 4040  
 G A T G T T C T T T G T A T T T A G G C A G C T G G A C A A C G A T C G T G A G

AF126284 BR/P05  
 4050 4060 4070 4080  
 C G C C A A T T C A C T C A G C A T C A C T T G A A T T T A G C A G T A T C C A

AF126284 BR/P05  
 4090 4100 4110 4120  
 A T A T A T T C G A C A A T T A T A A A G A C G G A T C C G G A G C A G C T C C  
 nsP3

AF126284 BR/P05  
 4130 4140 4150 4160  
 T T C T T A T C G C G T T A A G A G A A T G A A T A T C G C A G A C T G C A C A





4690 4700 4710 4720

AF126284  
BR/P05  
T A G G C T A C A G T A C C C A G T A T G G G A A A T T G T A C T C A T A C T T  
.....  
..... A G T A T G .....

4730 4740 4750 4760

AF126284  
BR/P05  
T G A A G G T A C T A A A T T C C A C C A A A C C G C A A A A G A C A T A G C C  
.....  
..... G .....

4770 4780 4790 4800

AF126284  
BR/P05  
G A G A T T C G T G C G C T G T T T C C T G A T G T A C A A G C C G C T A A C G  
.....  
.....

4810 4820 4830 4840

AF126284  
BR/P05  
A A C A A A T C T G C C T G T A C A C T T T A G G C G A A C C G A T G G A G T C  
.....  
.....

4850 4860 4870 4880

AF126284  
BR/P05  
C A T A C G C G A A A A G T G C C C A G T C G A A G A C T C C C C G G C A T C A  
.....  
.....

4890 4900 4910 4920

AF126284  
BR/P05  
G C A C C T C C T A A G A C A A T A C C T T G C C T A T G T A T G T A T G C T A  
.....  
.....

4930 4940 4950 4960

AF126284  
BR/P05  
T G A C A G C C G A A C G T A T T T G C C G C G T A C G C A G T A A C T C C G T  
.....  
..... G C .....

4970 4980 4990 5000

AF126284  
BR/P05  
A A C G A A C A T A A C G G T G T G C T C A T C C T T T C C G T T A C C C A A G  
.....  
.....

5010 5020 5030 5040

AF126284  
BR/P05  
T A C C G A A T A A A G A A C G T A C A A A A G A T A C A G T G C A C G A A A G  
.....  
..... G .....

5050 5060 5070 5080

AF126284  
BR/P05  
T C G T G C T A T T T A A C C C G G A T G T A C C G C C C T A C A T T C C C G C  
.....  
..... T .....

5090 5100 5110 5120

AF126284  
BR/P05  
G A G A G T A T A C A T T A A C A A G G A C G A G C C T C C T G T T A C T C C C  
.....  
.....

5130 5140 5150 5160

AF126284  
BR/P05  
C A T A C C G A C A G C C C G C C G G A C A C T T G C T C T T C G A G G C T A T  
.....  
.....

5170 5180 5190 5200

AF126284  
BR/P05  
C G C T G A C G C C C A C G C T C T C T A A C G C A G A A T C G G A T A T C G T  
.....  
.....

5210 5220 5230 5240  
AF126284  
BR/P05  
A T C T C T A A C G T T T T C G G A A A T C G A T A G C G A G C T G T C G T C A  
. . . . . A . . . . .

5250 5260 5270 5280  
AF126284  
BR/P05  
C T A A A C G A G C C T G C G A G G C A C G T A A T G A T A T C C T C G T T C A  
. . . . . G A . G C A C G T . A T G A T A T . C T C G . T C

5290 5300 5310 5320  
AF126284  
BR/P05  
A G C T G A G G T A C A C T G C G A T C C A G G C T T T A C C T C A G A A G C T  
. A G C T G A . G T A C A C T G C G A T . C A . G C . . T A . C T C A G . A G C

5330 5340 5350 5360  
AF126284  
BR/P05  
G A G T T G G A T G A G A G A G G A T C G C A C A C C G A G A C A G C C G C C T  
T G A G . T . G A T G A G A G A . G A T C G . . . . .

5370 5380 5390 5400  
AF126284  
BR/P05  
C C T G T A C C G C C A C C A C G A C C A A A A C G A G C C G C G A A A T T A T  
. . . . .

5410 5420 5430 5440  
AF126284  
BR/P05  
C C C G A C T A G C A A A C C A G  
. . . . . C G C A G A A T C G G A T A T C G T A T C T C T

5450 5460 5470 5480  
AF126284  
BR/P05  
A A C G T T T T C A G A A A T C G A T A G C G A G C T G T C G T C A C T A A A C  
. . . . .

5490 5500 5510 5520  
AF126284  
BR/P05  
G A G C C T G C G G A G G C A C G T A A T G A T A T C C T C G T T C A A G C T G  
. . . . .

5530 5540 5550 5560  
AF126284  
BR/P05  
A G G T A C A C T G C G A T C C A G G C T T T A C C T C A G A A G C T G A G T T  
. . . . .

5570 5580 5590 5600  
AF126284  
BR/P05  
G G A T G A G A G A G G A T C G A C A C C G A G A C A G C C G C C T C C T G T A  
. . . . .

5610 5620 5630 5640  
AF126284  
BR/P05  
C C G C C A C C A C G A C C A A A A C G A G C C G C G A A A T T A T C C C G A C  
. . . . .

5650 5660 5670 5680  
AF126284  
BR/P05  
T A G C A A A C C A G . . . . . C T A A A C G A G C T A C G G A G G C A T G C G A C G A T  
. . . . . C T A C . G A . G C A T G C G A C G A

5690 5700 5710 5720  
AF126284  
BR/P05  
A T C C T C C G T T C A A G C T G A G G T A C A C T A C A A T T C A G G T T T T  
T A T . C T . . . . .

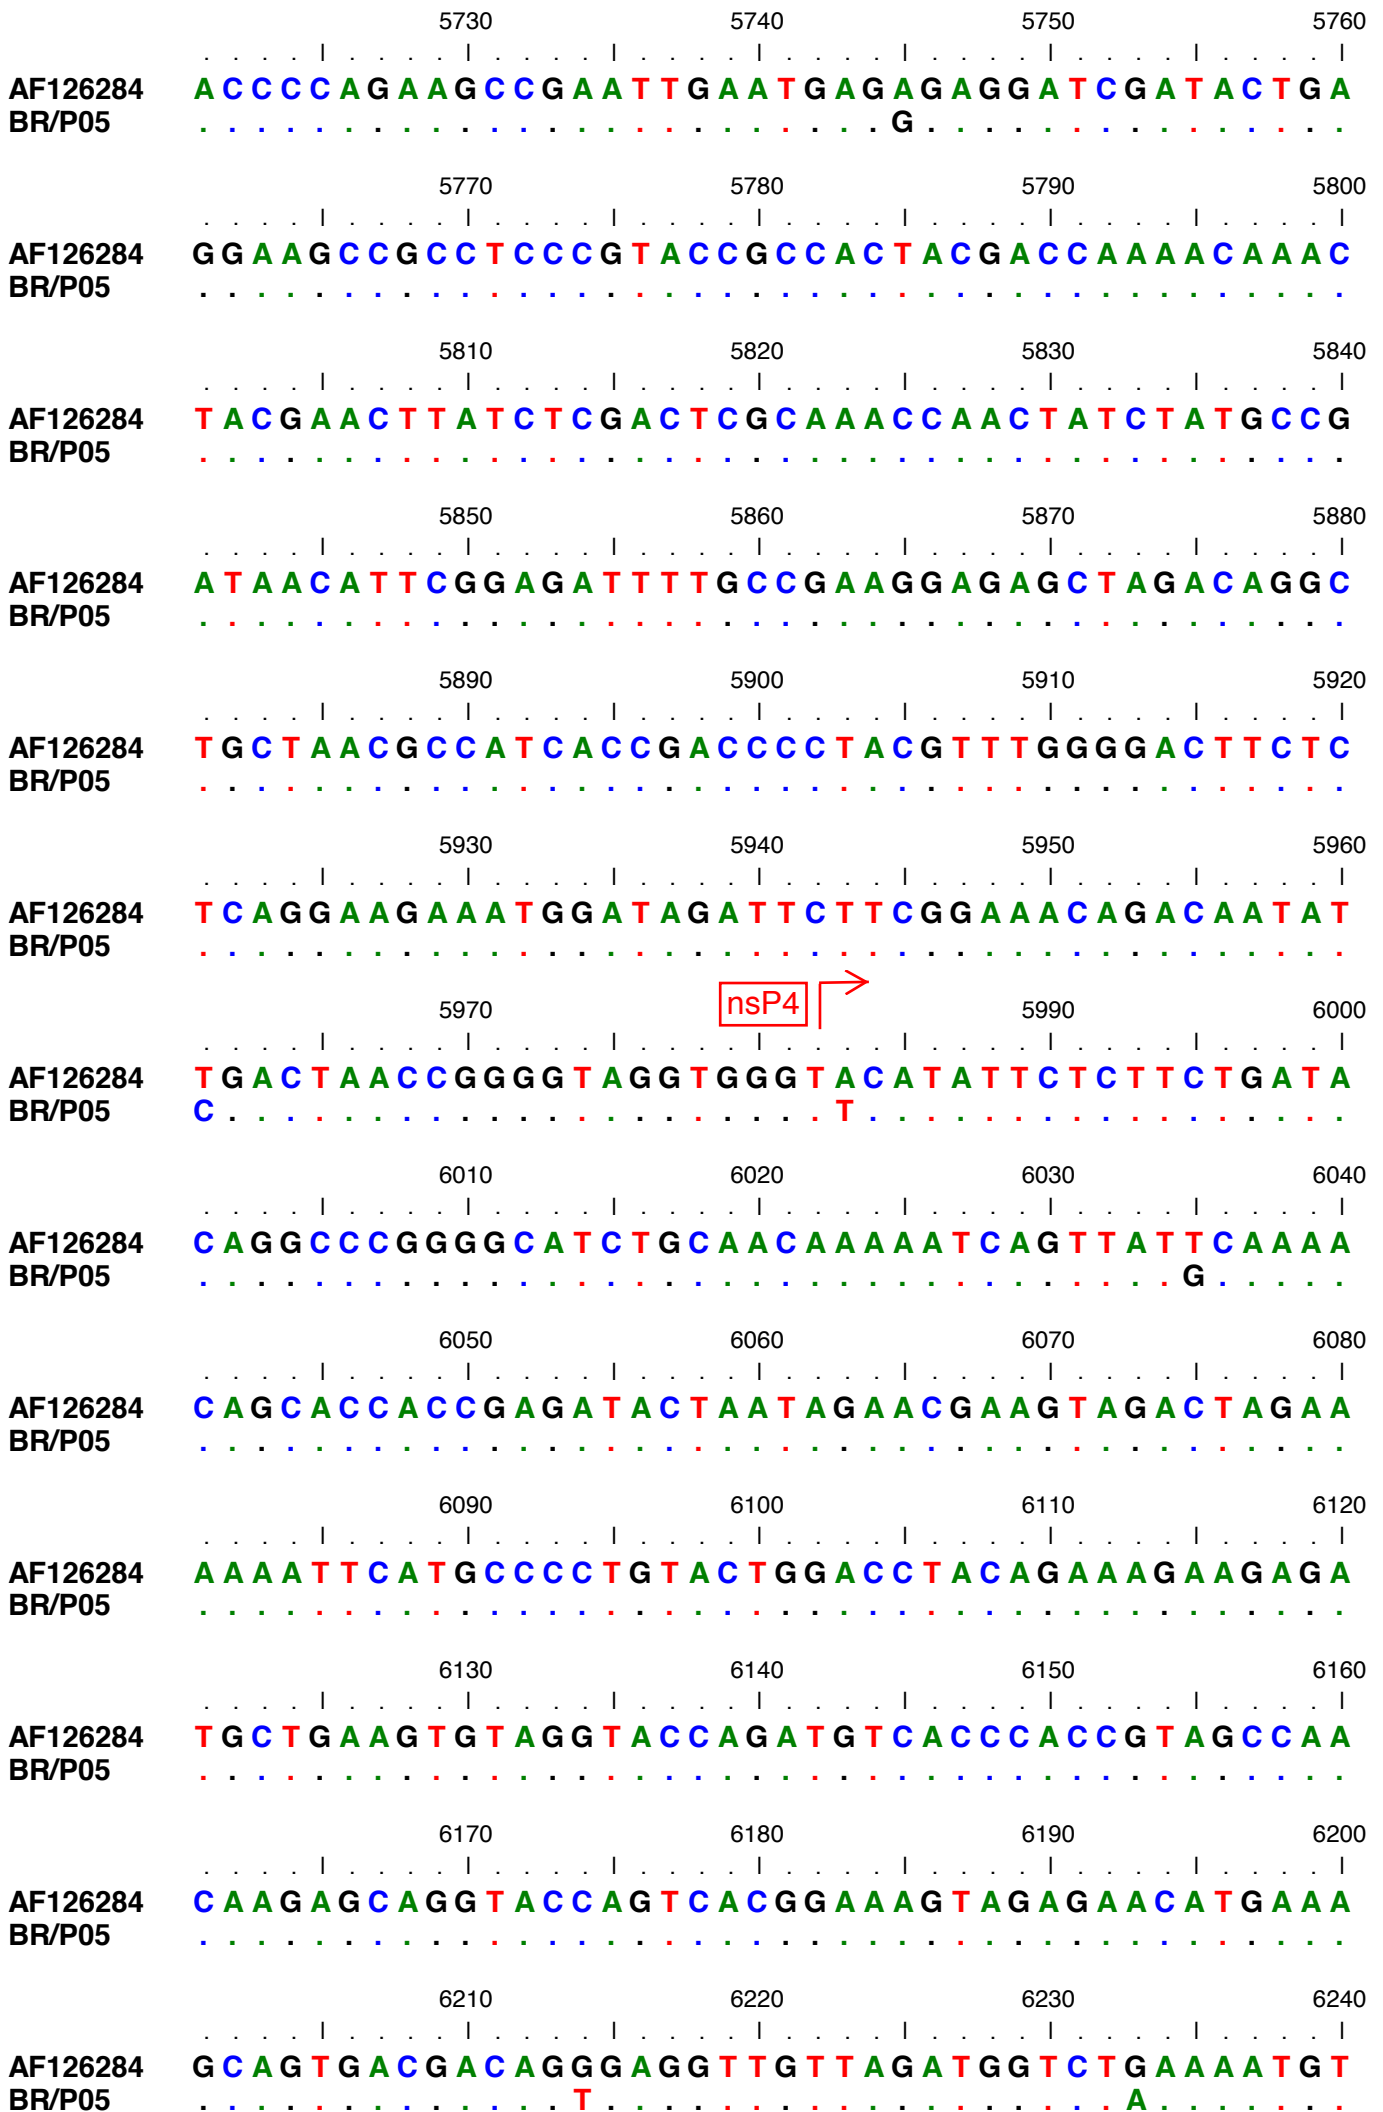

AF126284 BR/P05  
 6250 6260 6270 6280  
 A C G T C A C C C C G G A C G T T G A A G C A G A A T G C T A C A A G T A C A C

AF126284 BR/P05  
 6290 6300 6310 6320  
 G T A T C C A A A A C C G A T G T A T T C T G C C A G C G T G C C T G A C C G C

AF126284 BR/P05  
 6330 6340 6350 6360  
 T T C G T A T C A C C T G A A G T G G C A G T A G C G G T C T G C A A C A A C T

AF126284 BR/P05  
 6370 6380 6390 6400  
 T C T T C C A T G A G A A T T A T C C T A C G G T A G C C T C T T A C C A G A T  
 . . . . T . . . . . C . . . . .

AF126284 BR/P05  
 6410 6420 6430 6440  
 A A C T G A C G A G T A C G A T G C C T A C T T A G A C A T G G T C G A G G G G  
 . . . . . C . . . . . C . . . . .

AF126284 BR/P05  
 6450 6460 6470 6480  
 T C T G T A T C G T G T T T A G A T A C T G C T A C A T T C T G C C C A G C G A

AF126284 BR/P05  
 6490 6500 6510 6520  
 A A C T G A G G A G C T T C C C A A A G A C A C A C T C T T A C C T G G A A C C

AF126284 BR/P05  
 6530 6540 6550 6560  
 T A C G T T G C G G A G T G C G G T T C C A T C G G C G T T T C A G A A C A C C  
 . . . . . C . . . . .

AF126284 BR/P05  
 6570 6580 6590 6600  
 C T G C A A A A C G T A T T A T C A G C A G C T A C T A A A A G G A A C T G C A

AF126284 BR/P05  
 6610 6620 6630 6640  
 A T G T A A C A C A A A T G A G A G A A C T G C C T G T G C T A G A T T C C G C

AF126284 BR/P05  
 6650 6660 6670 6680  
 C G T G T T C A A T G T G G A G T G C T T T A A A A A G T A T G C A T G T A A T  
 . . . . C . . . . .

AF126284 BR/P05  
 6690 6700 6710 6720  
 A C A G A C T A C T G G G A A G A A T T T A A A G A G A A A C C A A T A A G A A

AF126284 BR/P05  
 6730 6740 6750 6760  
 T A A C A A C A G A G T G T G T C A C C T C A T A C G T G G C C C G A T T A A A



AF126284 BR/P05  
7290 7300 7310 7320  
A C A C T G T T T G T T A A C A C T G T G T T G A A T G T A G T T A T T G C T A

AF126284 BR/P05  
7330 7340 7350 7360  
G C C G A G T T C T A G A A C A A C G G T T G A G G G A C T C C A A A T G C G C

AF126284 BR/P05  
7370 7380 7390 7400  
A G C T T T C A T A G G G G A C G A C A A C A T T A T A C A T G G T G T C G T T

AF126284 BR/P05  
7410 7420 7430 7440  
T C G G A C A A G A T A A T G G C C G A C A G A T G C G C C A C T T G G A T G A

AF126284 BR/P05  
7450 7460 7470 7480  
A T A T G G A A G T G A A A A T C A T A G A C G C G G T C A T T G G T A T C A A  
A

AF126284 BR/P05  
7490 7500 7510 7520  
G G C C C C T T A C T T T T G C G G C G G A T T T A T T C T A G A A G A C C A A

AF126284 BR/P05  
7530 7540 7550 7560  
G T G A C G C A C A C A G C G T G C C G G G T C T C T G A T C C G C T T A A G A

AF126284 BR/P05  
7570 7580 7590 7600  
G A C T G T T C A A A C T A G G C A A G C C T C T A C C A G T A G A T G A T G A

AF126284 BR/P05  
7610 7620 7630 7640  
G C A G G A T C A C G A C A G G C G T A G A G C G C T G G A A G A T G A G A C A

AF126284 BR/P05  
7650 7660 7670 7680  
A G G G C G T G G T T C A G A G T G G G G A T C C A A G G A G A A C T T T T G A

AF126284 BR/P05  
7690 7700 7710 7720  
A G G C C G T C G A G T C A C G C T A T G A G G T A C A A G A G G T T C A G C C

AF126284 BR/P05  
7730 7740 7750 7760  
A G T G C T G T T A G C C C T C G C T A C G T T C T C G C G T A G C G A T A A A

AF126284 BR/P05  
7770 7780 7790 7800  
G C A T T T A A A G C A C T A C G C G G G A G C C C A A G A C A C C T C T A C G

7810 **NCR** → 7820 7830 7840

AF126284  
BR/P05  
G T G G T C C T A A A T A G A C G G T G T A G C A C A G T A G A T C G T C T A A

7850 7860 **C** → 7870 7880

AF126284  
BR/P05  
A T T A T T T C A C A T C T T T A C G T T A C T A T G A A C T C T G T C T T T T

7890 7900 7910 7920

AF126284  
BR/P05  
A C A A T C C G T T T G G C C G A G G T G C C T A C G C T C A A C C T C C A A T  
T

7930 7940 7950 7960

AF126284  
BR/P05  
A G C A T G G A G G C C A A G A C G T A G G G C T G C A C C T G C G C C T C G A  
C G

7970 7980 7990 8000

AF126284  
BR/P05  
C C A T C C G G G T T G A C T A C C A G A T C C A A C A G C T C A C T A G G G

8010 8020 8030 8040

AF126284  
BR/P05  
C T G T T A G A G C T T T G G T G C T G G A C A A T G C T A C A C G T C G C C A  
G

8050 8060 8070 8080

AF126284  
BR/P05  
G C G C C C G G C T C C T C G C A C G C G C C C G A G G A A G C C G A A G A C T  
G C G

8090 8100 8110 8120

AF126284  
BR/P05  
C A A A A C C T A A G C C G A A G A A G C A A A C C A G A A C C A C C A C

8130 8140 8150 8160

AF126284  
BR/P05  
A A C A G C A G A A G A A A G G A A A A T C A G C C C A A C A A C C G A A

8170 8180 8190 8200

AF126284  
BR/P05  
G A A A C C G A A G C C C G G T A A A C G A C A G C G T A C C G C C C T G A A A  
C

8210 8220 8230 8240

AF126284  
BR/P05  
T T T G A A G C C G A C C G C A C A T T T G T C G G G A A G A A T G A A G A C G  
C G T

8250 8260 8270 8280

AF126284  
BR/P05  
G C A A G A T T A T G G G A T A C G C C G T T G C C A T G G A A G G G A A A G T

8290 8300 8310 8320

AF126284  
BR/P05  
G A T A A A A C C A C T A C A T G T A A A A G G A A C C A T T G A C C A C C C G



8330 8340 8350 8360

AF126284  
BR/P05  
G C C C T A G C G A A A C T T A A A T T C A C T A A A T C T T C T T C T T A C G  
C

8370 8380 8390 8400

AF126284  
BR/P05  
A C A T G G A G T T T G C T A A A C T A C C G A C C G A A A T G A A A A G C G A  
C

8410 8420 8430 8440

AF126284  
BR/P05  
C G C A T T C G G G T A T A C A A C G G A A C A C C C C G A A G T A T T T T A C  
A G

8450 8460 8470 8480

AF126284  
BR/P05  
A A C T G G C A T C A C G G A G C T G T C C A A T T T T C C G G C G G A A G G T

8490 8500 8510 8520

AF126284  
BR/P05  
T C A C C A T C C C T A C A G G A G T C G G A G G C C C C G G A G A T A G C G G  
C G

8530 8540 8550 8560

AF126284  
BR/P05  
A A G G C C T A T A C T G G A T A A C T C C G G A A A A G T G G T A G C C A T A

8570 8580 8590 8600

AF126284  
BR/P05  
G T C C T A G G A G G A G C T A A T G A A G T G C C A G G A A C G G C A C T T T  
G T G C A

8610 8620 8630 8640

AF126284  
BR/P05  
C T G T T G T C A C C T G G A A T A A G A A G G G A G C C G C T A T T A A A A C

8650 8660 8670 8680

AF126284  
BR/P05  
C A C C C A C G A A G A T A C T G T A G A G T G G T C G C G G G C T A T T A C C  
C G C

8690 8700 8710 8720

AF126284  
BR/P05  
G C T A T G T G C A T C C T G C A G A A C G T C A C A T T C C C A T G T G A C C

8730 8740 8750 8760

AF126284  
BR/P05  
G A C C G C C A A C T T G C T A T A A T C G T A A T C C T G A C T T G A C C C T

8770 8780 8790 8800

AF126284  
BR/P05  
A A C C A T G T T G G A A A C A A A T G T C A A T C A C C C T T C G T A C G A C

8810 8820 8830 8840

AF126284  
BR/P05  
G T T C T G C T G G A C G C T G C T C T G A G G T G C C C C A C G A G A C G G C  
C

E2 →

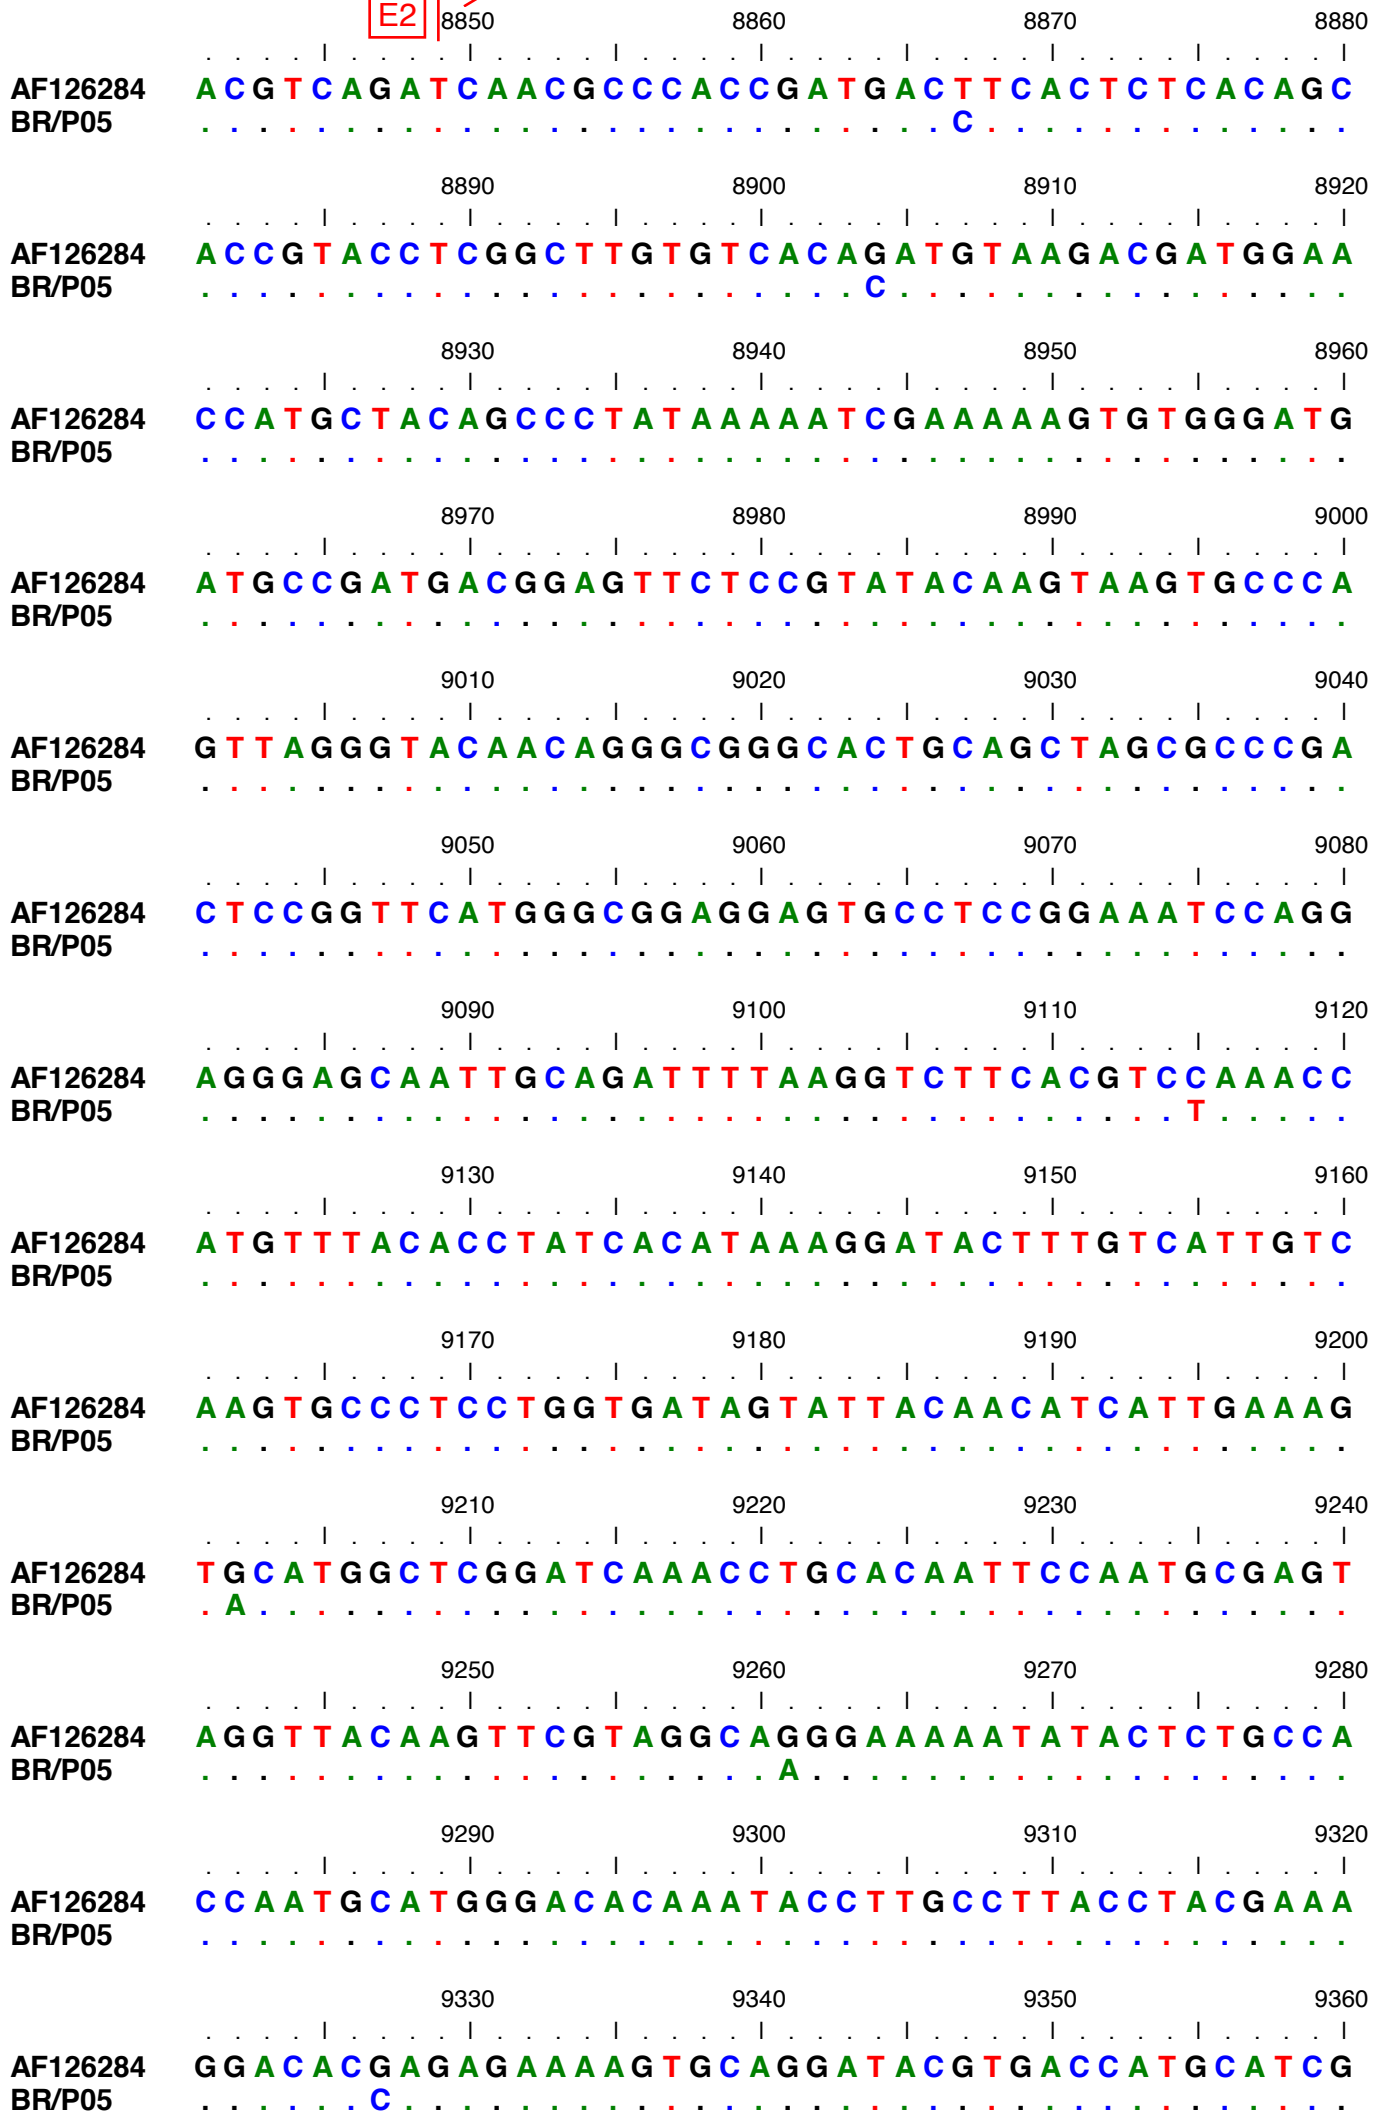

9370 9380 9390 9400  
AF126284  
BR/P05  
T C C C G G A C A A C A A T C C A T A A C C A T G C T G A T G G A A G A G A G C

9410 9420 9430 9440  
AF126284  
BR/P05  
G G A G G G G A G G T G T A C G T A C A A C C G A C C A G T G G G C G A A A C G

9450 9460 9470 9480  
AF126284  
BR/P05  
T C A C C T A C G A G T G T A A A T G C G G A G A C T T T A A A A C T G G G A C

9490 9500 9510 9520  
AF126284  
BR/P05  
T G T C A C T G C G C G C A C T A A A A T A G A C G G C T G T A C A G A A A G G  
G

9530 9540 9550 9560  
AF126284  
BR/P05  
A A A C A A T G C A T T G C G A T T T C T G C C G A C C A C G T C A A A T G G G  
T A . . T C

9570 9580 9590 9600  
AF126284  
BR/P05  
T G T T T A A C T C C C C T G A C T T G A T C A G G C A T A C C G A C C A C A C

9610 9620 9630 9640  
AF126284  
BR/P05  
A G C C C A A G G G A A G T T G C A T A T A C C A T T C C C G C T A C A G C A G

9650 9660 9670 9680  
AF126284  
BR/P05  
G C T C A A T G T A C A G T A C C A C T G G C G C A C C T T C C A G G C G T T A  
C

9690 9700 9710 9720  
AF126284  
BR/P05  
A G C A T G C T T A T C G C A G T A T G T C T C T G A C A C T G C A C G C T G A  
T

9730 9740 9750 9760  
AF126284  
BR/P05  
G C A T C C T A C A T T G C T T A C T A C C C G C C A T C T T G G A G A A A A T

9770 9780 9790 9800  
AF126284  
BR/P05  
C C T C A G C C C A C T G C A G A A T G G A T T G T C G G G A G T G T A A C T C

9810 9820 9830 9840  
AF126284  
BR/P05  
G A A A C T T C T C C A T A A C C A T A C A A G G G T T C G A G T A T A C T T G

9850 9860 9870 9880  
AF126284  
BR/P05  
G G G A A A T C A G A A A C C G G T C C G A G T G T A C G C G C A G G A A T C G  
G G

9890 9900 9910 9920

AF126284  
BR/P05  
G C A C C T G G C A A T C C T C A T G G C T G G C C A C A T G A A A T C G T A C  
.....  
..... T .....

9930 9940 9950 9960

AF126284  
BR/P05  
G C C A T T A C T A C C A C C T C T A T C C C T T C T A C A C C G T T A C A G T  
.....  
.....

9970 9980 9990 10000

AF126284  
BR/P05  
G C T G A G C G G C A T G G G A C T G G C C A T A T G C G C T G G C T T A G T G  
.....  
.....

10010 10020 10030 10040

AF126284  
BR/P05  
A T C A G T A T T T T A T G C T G C T G C A A A G C A A G A A G G G A T T G C C  
.....  
.....

10050 10060 10070 10080

AF126284  
BR/P05  
T A A C A C C T T A C C A A C T G G C C C C G A A C G C T A C C G T A C C A T T  
.....  
.....

10090 10100 10110 10120

AF126284  
BR/P05  
T C T G G T A A C A T T G T G T T G C T G T T T C C A A C G G A C T T C A G C G  
.....  
..... A G .....

10130 10140 10150 10160

AF126284  
BR/P05  
G A T G A A T T T A C C G A T A C C A T G G G G T A C C T A T G G C A A C A C A  
.....  
.....

10170 10180 10190 10200

AF126284  
BR/P05  
G T C A A A C A A T G T T C T G G A T A C A A T T G G T C A T A C C T T T A G C  
.....  
.....

10210 10220 10230 10240

AF126284  
BR/P05  
A G C A G T G A T A A C T T T G G T T A G A T G T T G C T C C T G C T G T C T A  
.....  
.....

10250 10260 10270 10280

AF126284  
BR/P05  
C C T T T T T T A T T G G T T G C C A G T C C T - - C C T A A C A A A G C G G  
.....  
..... A G . C G T C C T C . T A . C A . G . . . .

10290 10300 10310 10320

AF126284  
BR/P05  
A C G C C T A C G A A C A T A C G A T C A C T G T C C C A A A T G C G C C G T T  
.....  
.....

10330 10340 10350 10360

AF126284  
BR/P05  
G A A C T C G T A T A A A G C A C T A G T G G A A C G G C C T G G G T A T G C C  
.....  
.....

10370 10380 10390 10400

AF126284  
BR/P05  
C C C T T G A A T C T T G A A G T C A T G G T C A T G A A C A C C C A G A T C A  
.....  
.....

6K →

E1 →

10410 10420 10430 10440

AF126284  
BR/P05  
T A C C A T C G G T T A A A C G T G A A T A C A T T A C C T G C A G G T A C C A

10450 10460 10470 10480

AF126284  
BR/P05  
C A C C G T T G T T C C T T C A C C G C A G A T T A A A T G T T G C G G A A C T

10490 10500 10510 10520

AF126284  
BR/P05  
G T C G A A T G C C C G A A A G G T G A A A A G A G C A G A C T A T A C C T G C A  
C

10530 10540 10550 10560

AF126284  
BR/P05  
A G G T G T T C A C T G G T G T G T A C C C A T T T C T G T G G G G A G G A G C

10570 10580 10590 10600

AF126284  
BR/P05  
A C A G T G T T T T T G C G A C T C C G A A A A C A G T C A G C T T A G C G A C  
A

10610 10620 10630 10640

AF126284  
BR/P05  
A A G T A C G T C G A A C T G T C A A C A G A T T G C G C C A C A G A C C A T G  
G C A

10650 10660 10670 10680

AF126284  
BR/P05  
C C G A G G C G G T C A G A G T A C A C A C G G C T T C G G T G A A A T C A C A

10690 10700 10710 10720

AF126284  
BR/P05  
G C T C C G A A T A A C C T A C G G G A A C T C C A C A G C A C A A G T A G A C

10730 10740 10750 10760

AF126284  
BR/P05  
G T A T T T G T C A A C G G T G T G A C T C C A G C C A G G A G C A A A G A C A

10770 10780 10790 10800

AF126284  
BR/P05  
T G A A A T T G A T A G C C G G C C C A T T A T C T A C T A C A T T T T C C C C

10810 10820 10830 10840

AF126284  
BR/P05  
G T T T G A T A A T A A G G T C A T T A T A T A T C A T G G G A A A G T C T A T

10850 10860 10870 10880

AF126284  
BR/P05  
A A C T A T G A C T T C C C G G A A T T T G G G G C C G G A A C A C C T G G A G  
C

10890 10900 10910 10920

AF126284  
BR/P05  
C T T T C G G A G A T G T C C A A G C G T C A T C C A C C A C C G G A T C A G A

10930 10940 10950 10960

AF126284  
BR/P05  
TCTATTAGCAAACACAGCAATTTCATTTGCAGAGGCCGGAA  
.....CAT.....

10970 10980 10990 11000

AF126284  
BR/P05  
GCCAGAAACATACACGTCCCGTACACCCAAGCTCCAAGCG  
.....

11010 11020 11030 11040

AF126284  
BR/P05  
GGTTCGAATTCTGGAAGAATAACAGCGGTTCAGCCTTTATC  
.....

11050 11060 11070 11080

AF126284  
BR/P05  
TGACACTGCCCTTTTCGGATGCAAAGTCAATGTCAACCCG  
.....A.....

11090 11100 11110 11120

AF126284  
BR/P05  
CTACGTGCAGACAAGTGTGCCGTGGGATCACTCCCGATAT  
.....

11130 11140 11150 11160

AF126284  
BR/P05  
CCGTGGATATAACGGACGCTGCATTTACACGCGTATCCGA  
.....

11170 11180 11190 11200

AF126284  
BR/P05  
G - - CCCCTGCCATCACTGCTTAAGTGCACCGTTACTAGT  
.GCC. .TGCCATCAGTGCA.....

11210 11220 11230 11240

AF126284  
BR/P05  
TGCACATACTCTACAGACTATGGCGGAGTGCCTCGTGTGTTGA  
..T.....A.....

11250 11260 11270 11280

AF126284  
BR/P05  
CATACGAGTCGGATCGCGCGGGGCAATGCGCTGTACACTC  
.....

11290 11300 11310 11320

AF126284  
BR/P05  
GCATTCATCAACAGCGGTACTGCGAGACCATCGGTATAC  
.....

11330 11340 11350 11360

AF126284  
BR/P05  
GTCGAGCAAAAAGGGGAGACTACACTTAAATTTAGTACGC  
.....C.....G

11370 11380 11390 11400

AF126284  
BR/P05  
GTTCCTTGCAGGCAGACTTCGAGGTATCGATGTGCGGGAAC  
C.....

11410 11420 11430 11440

AF126284  
BR/P05  
GAGAACCACTTGC CATGCCCCAATGTC AACCCACCAACGGAA  
.....

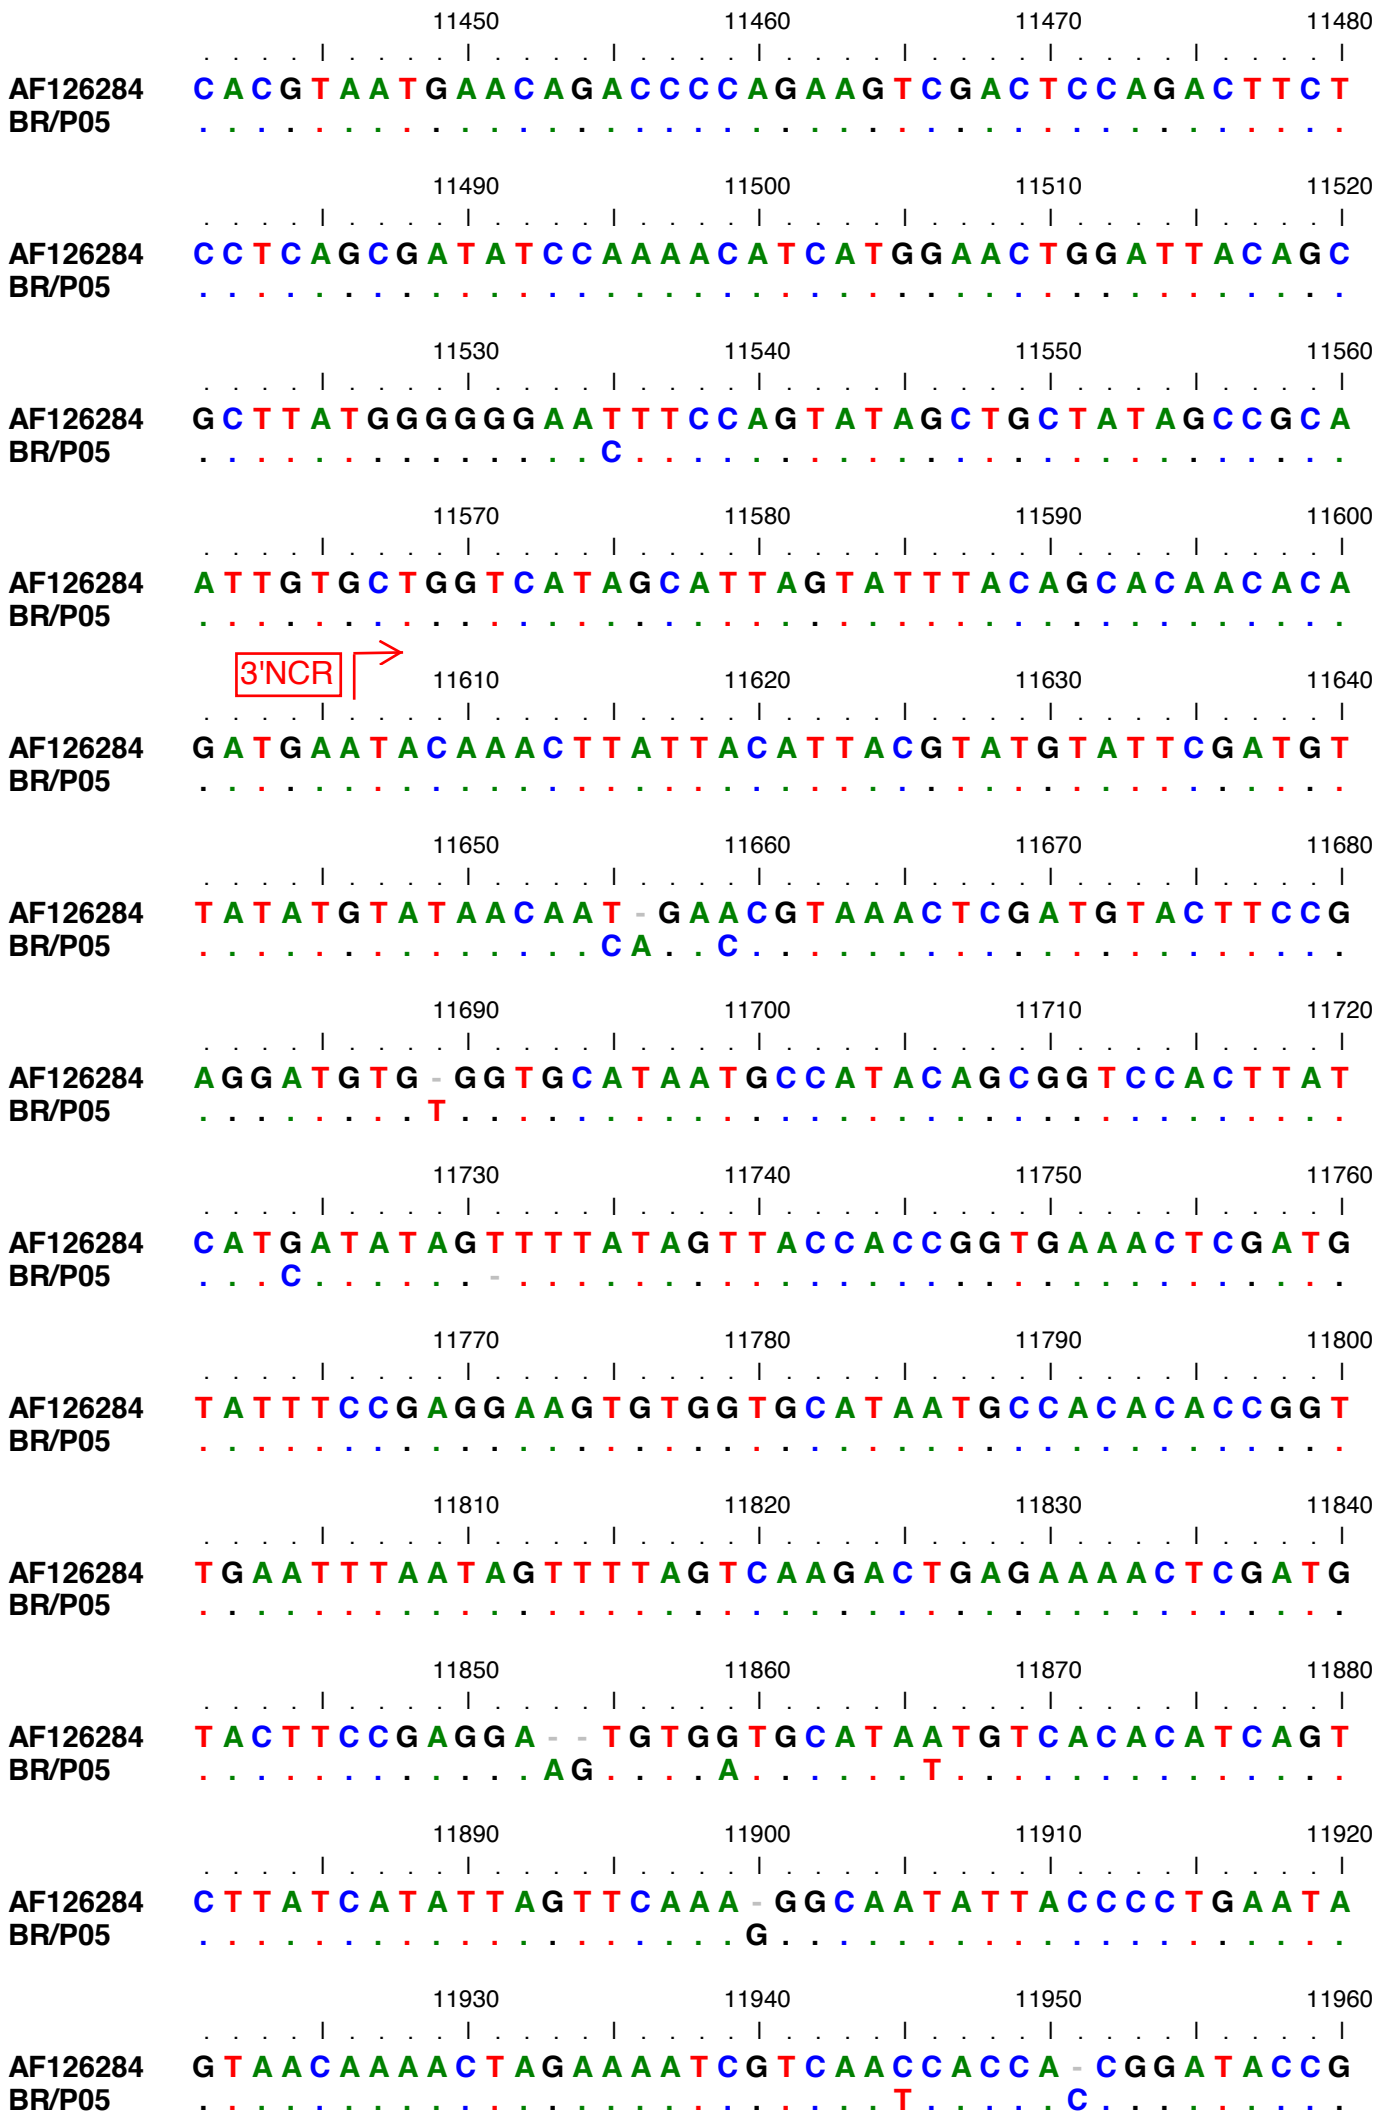





ORF1

nsP1

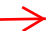

10 20 30 40

AF126284 MEKPTVHVVDVDPQSPFVLQLQKSFQF E I VAQQVTPNDHA  
BR/P05 . . . . . R . . . . .

50 60 70 80

AF126284 NARAFSHLASKLIEHEIPTSVTILDIGSAPARRMYSEHKY  
BR/P05 . . . . .

90 100 110 120

AF126284 HCVCPMRSPEDPDRLMNYASRLADKAGEITNKRLHDKLAD  
BR/P05 . . . . .

130 140 150 160

AF126284 LKSVLESPDAETGTICFHNDVICRTTAEVSVMQNVYINAP  
BR/P05 . . . . . T . . . . . D . . . . . D . . . . .

170 180 190 200

AF126284 STIYHQALKGVRLYWI GFDTTQFMFSSMAGSYPSYNTNW  
BR/P05 . . . . .

210 220 230 240

AF126284 ADERVLEARNIGLCSTKLREGTMGKLSLSTFRKKALKPGTNV  
BR/P05 . . . . . T . . . . . I L . . . . . D . . . . .

250 260 270 280

AF126284 YFSVGSTLYPENRADLQSWHLPSV FHLK GKQSFTCRCDTA  
BR/P05 . . . . .

290 300 310 320

AF126284 VNCEGYVVKKITISPGITGRVNR YTVTNNSEGFLLCKITD  
BR/P05 . . . . . G . A . . . . .

330 340 350 360

AF126284 TVKGERV SFPVCTYIPPSICDQMTGILATDIQPEDAQKLL  
BR/P05 . . . . .

370 380 390 400

AF126284 VGLNQRIVVNGKTNRNTNTMQNYLLPAVATGLSKWAKERK  
BR/P05 . . . . .

410 420 430 440

AF126284 ADCSDEKPLNVRERKLAFGCLWAFKTKKIHSFYRPPGTQT  
BR/P05 . . AD . . . . . G . . . . .

450 460 470 480

AF126284 IVKVAAEFSAFPMSVWTTSLPMSLRQKVKLLLVKKTNKP  
BR/P05 . . . . .

490 500 510 520

AF126284 VVTITDTAVKNAQEAYNEAVETAEEAEKAKALPPLKPTAP  
BR/P05 . . . . . E . . . . .

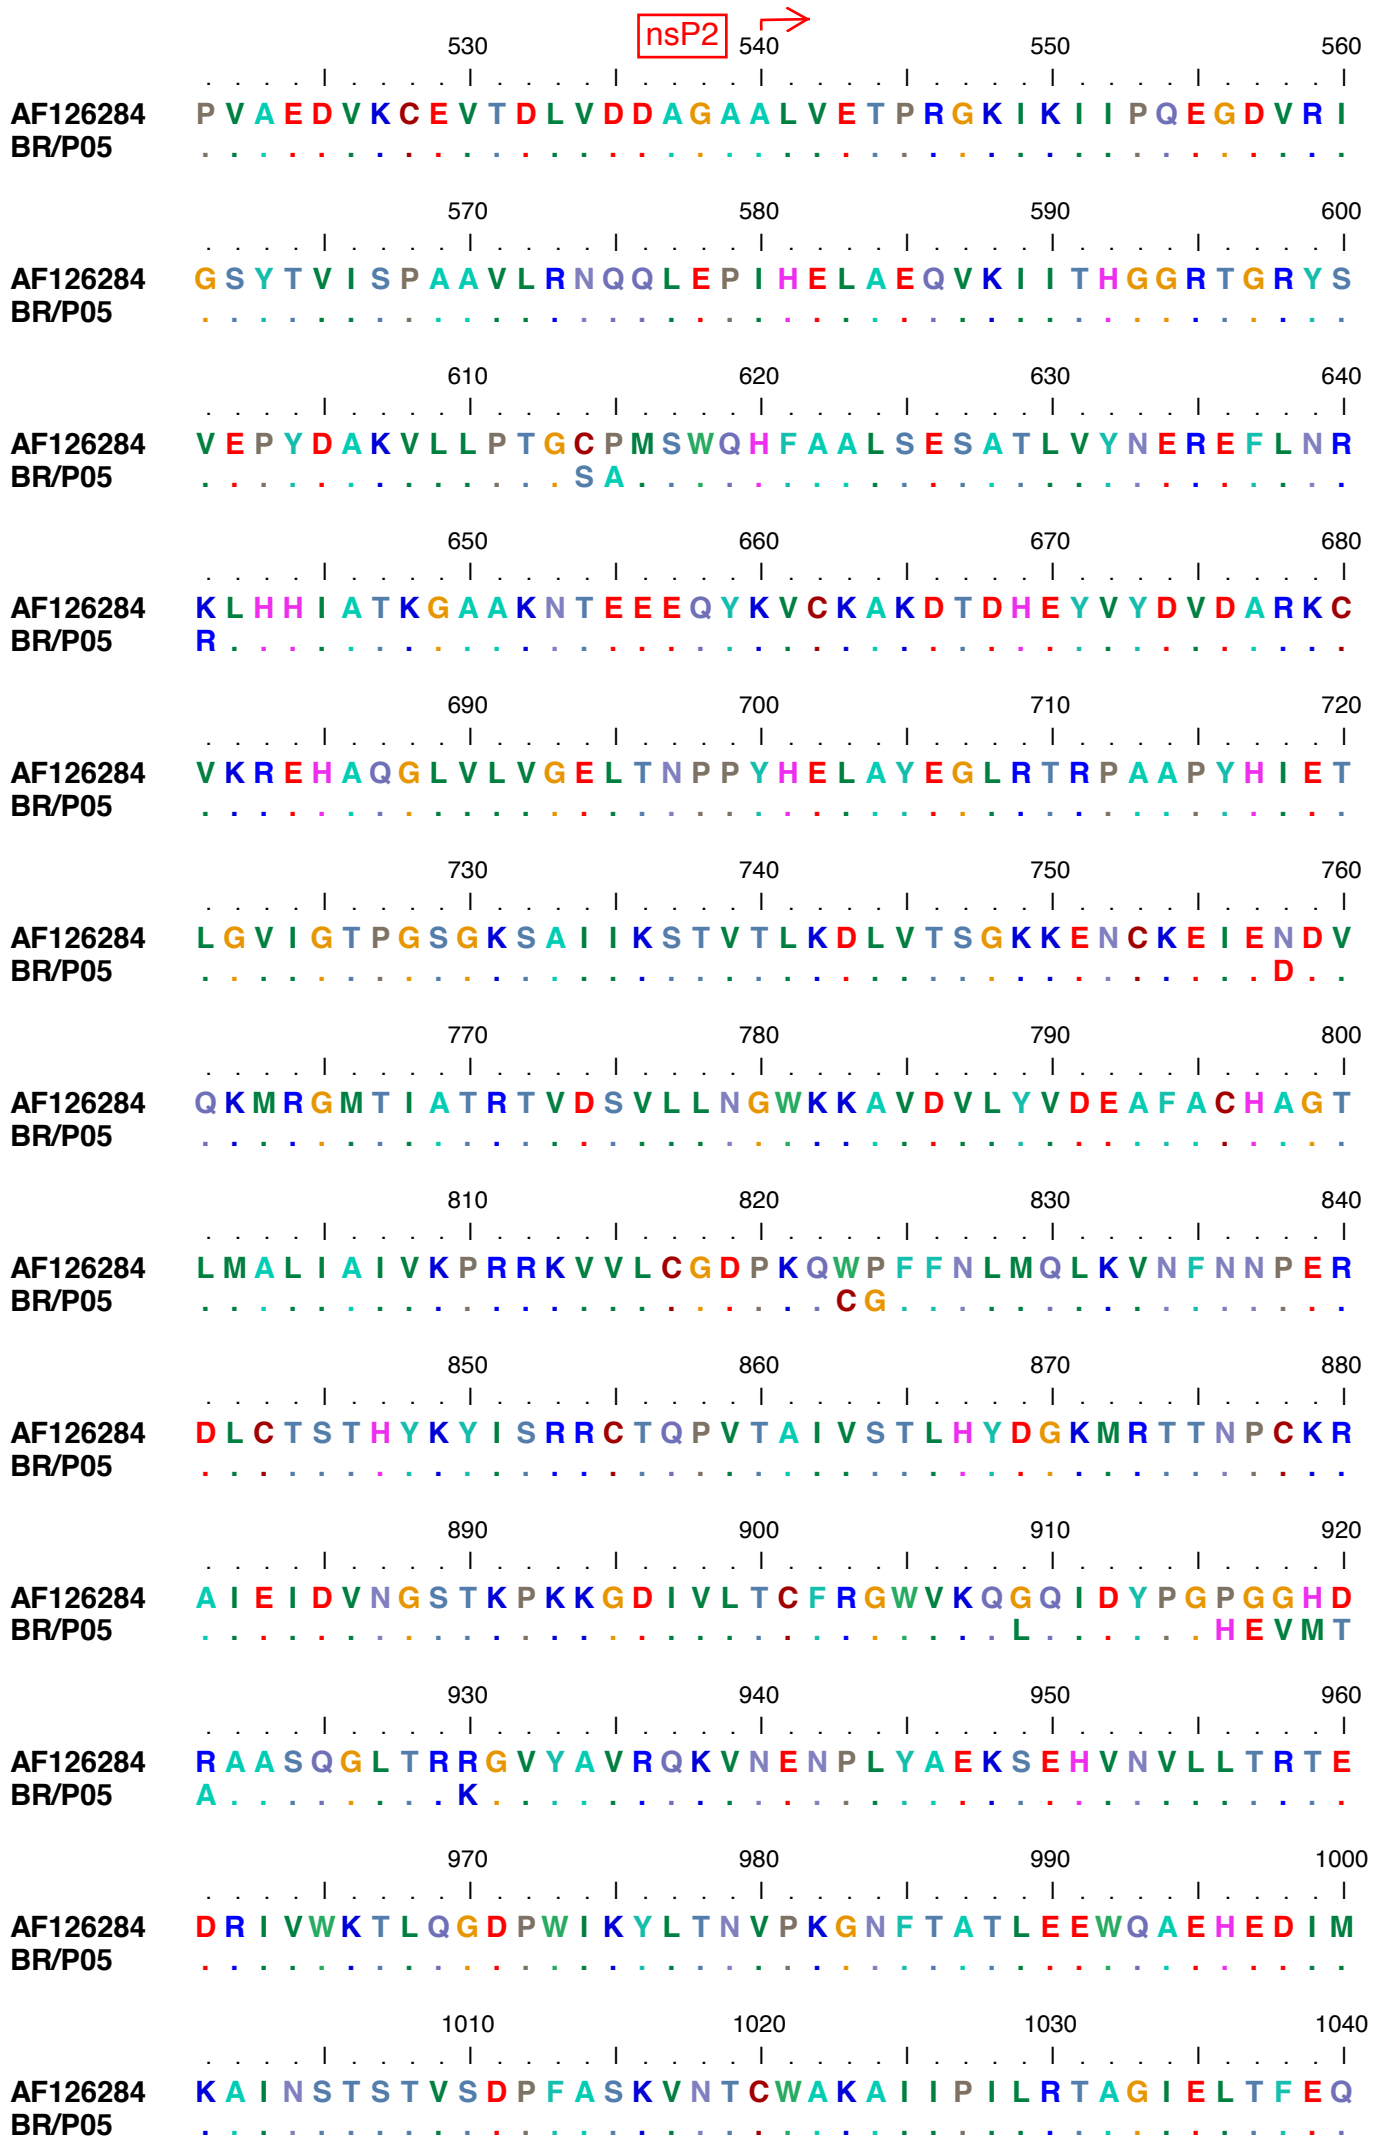

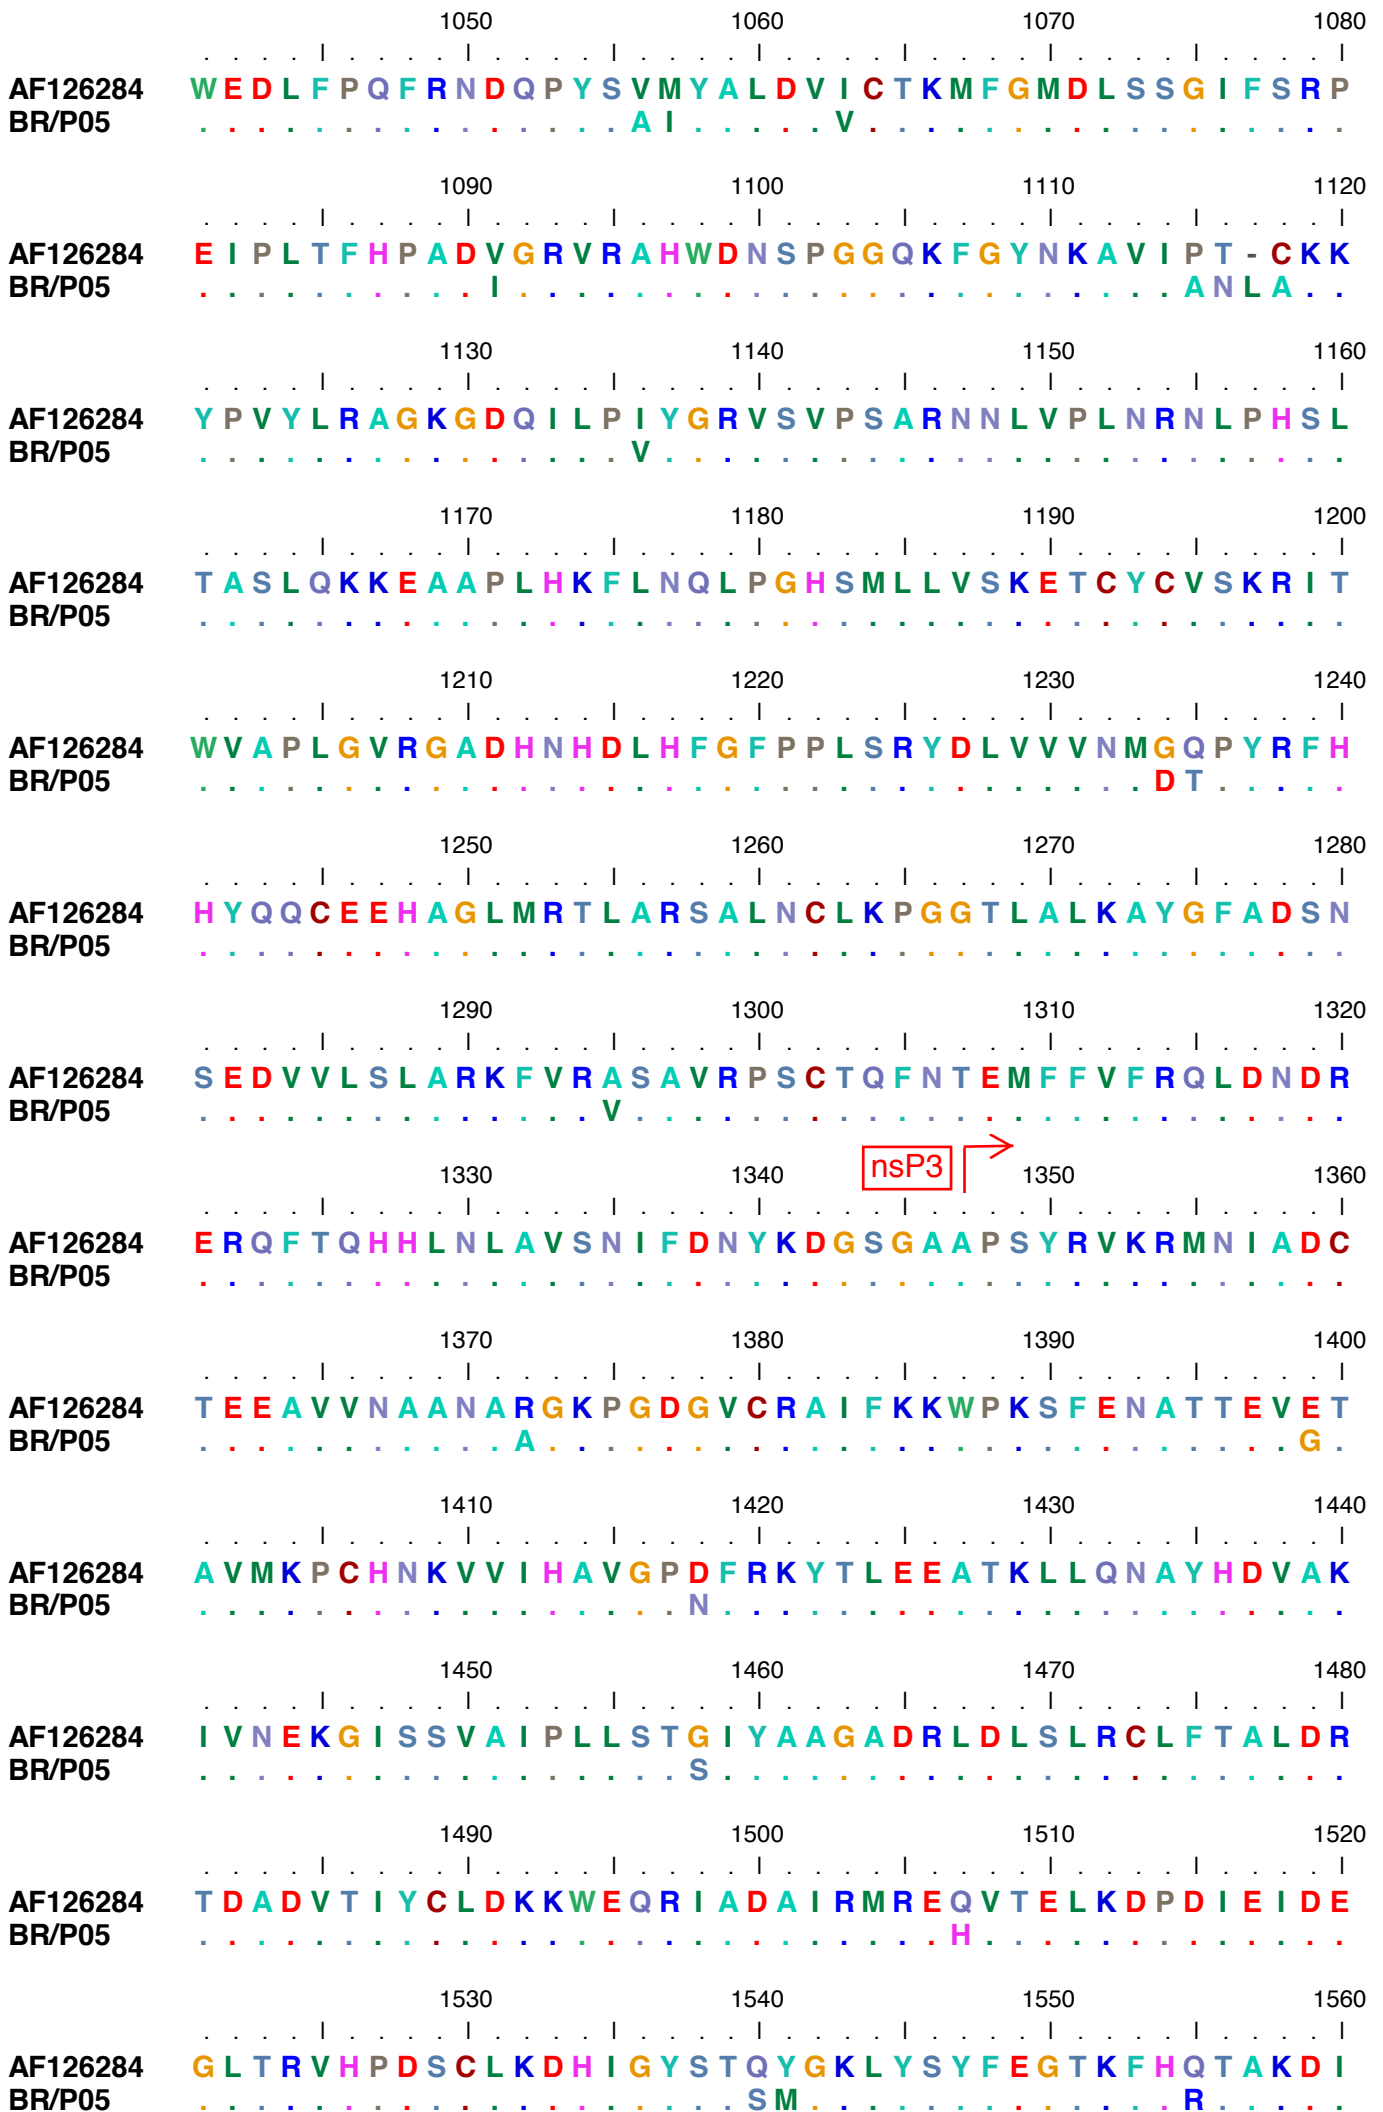

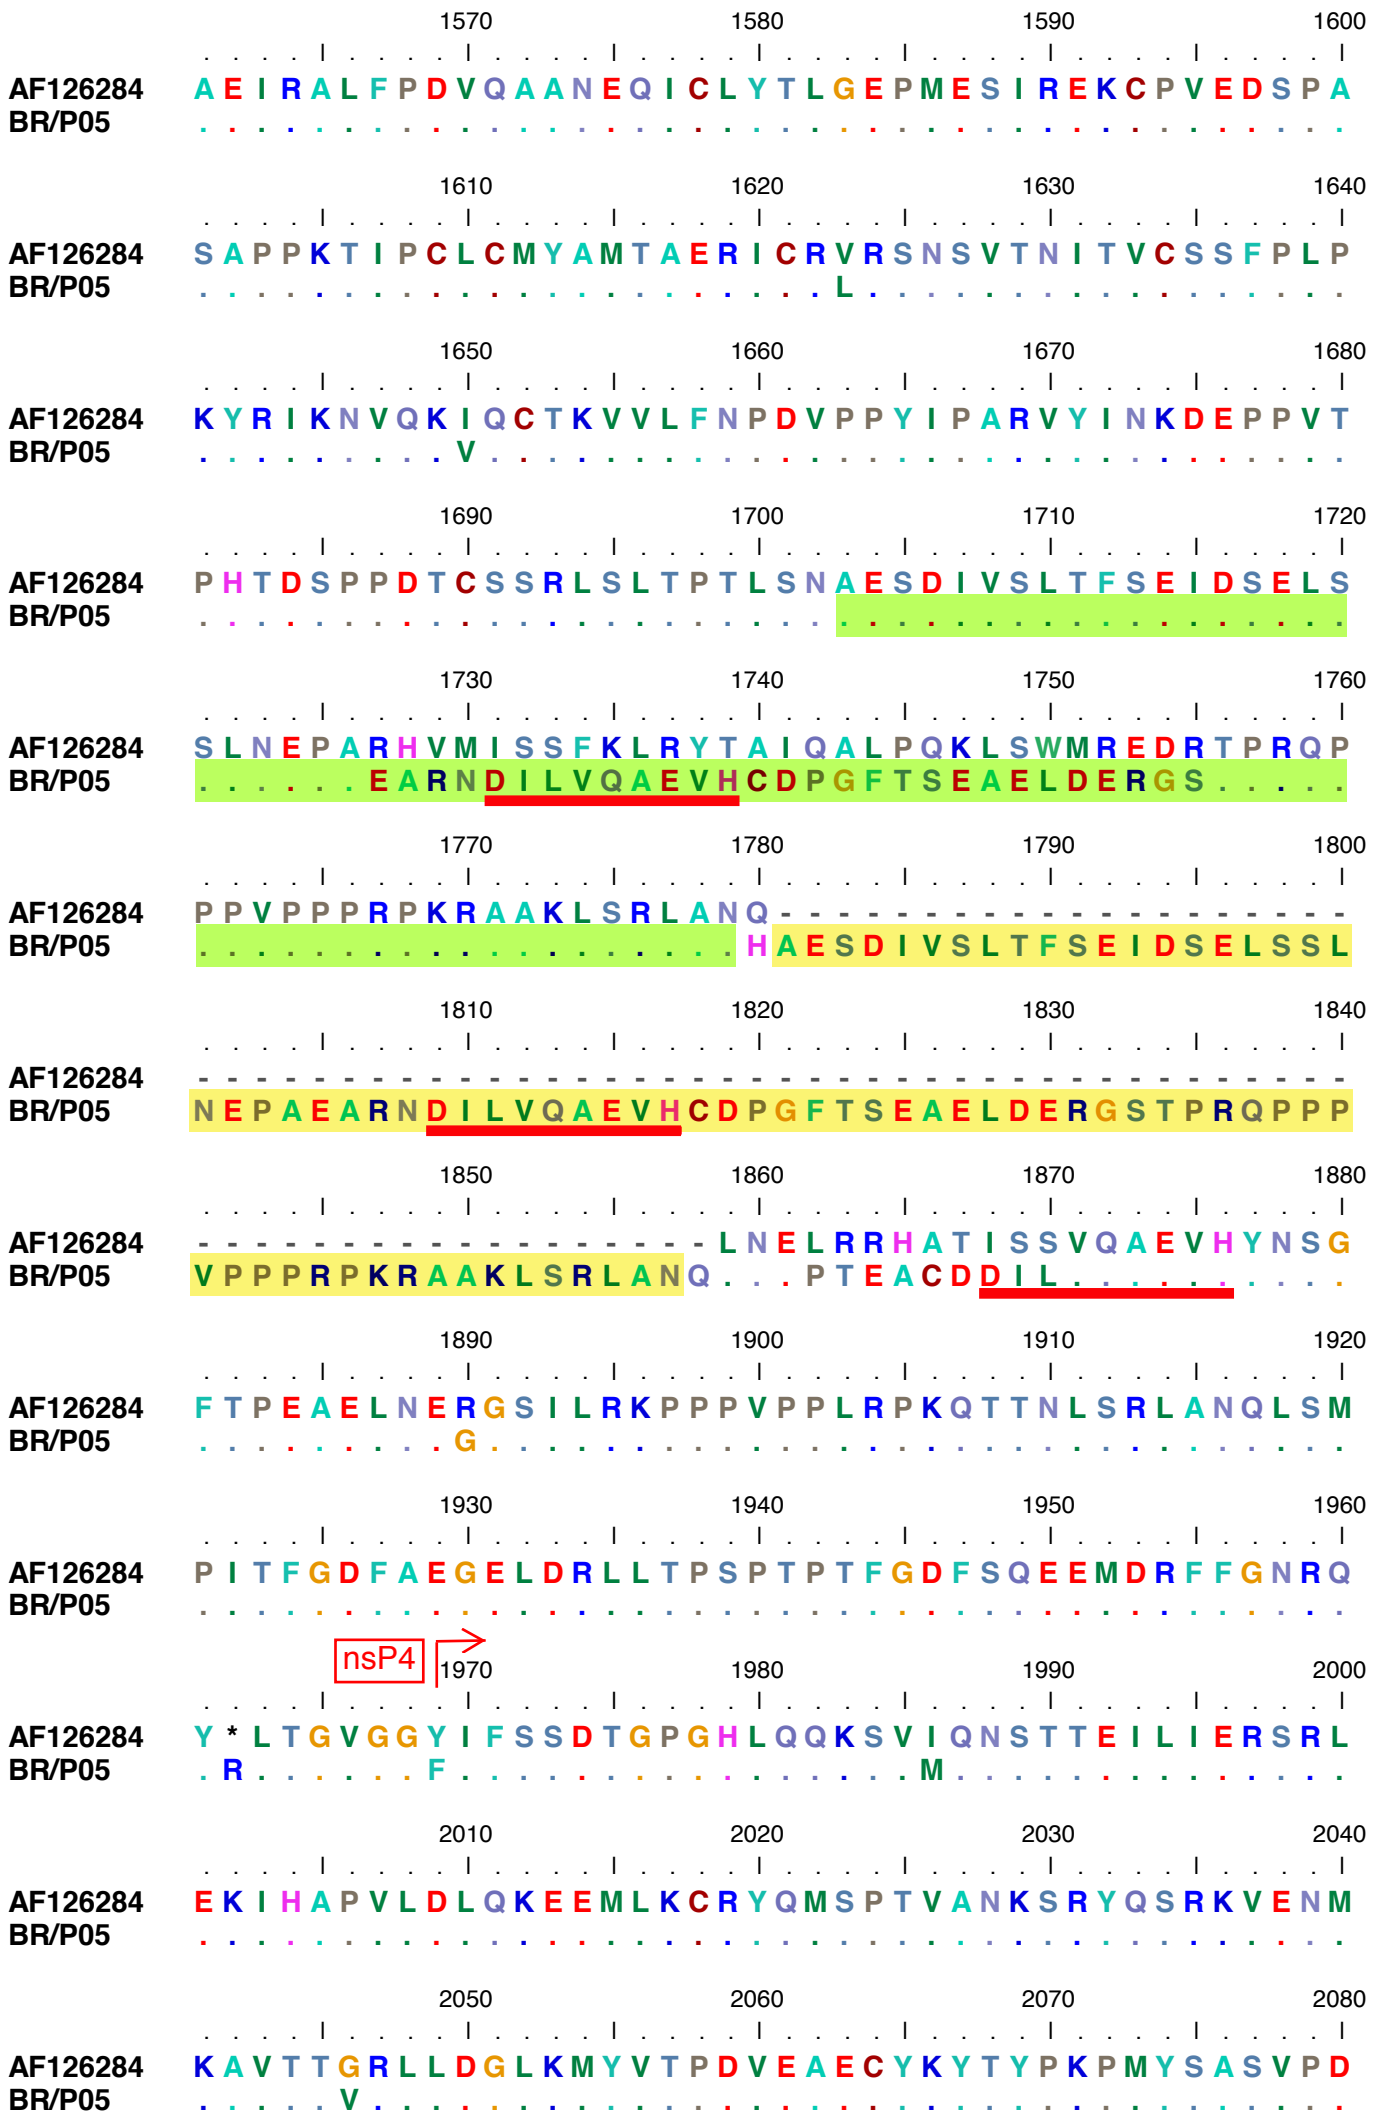





AF126284 BR/P05  
 T S G R N V T Y E C K C G D F K T G T V T A R T K I D G C T E R K Q C I A I S A  
 . . . . . 530 . . . . . 540 . . . . . 550 . . . . . 560 . . . . . Y F .

AF126284 BR/P05  
 D H V K W V F N S P D L I R H T D H T A Q G K L H I P F P L Q Q A Q C T V P L A  
 . . . . . 570 . . . . . 580 . . . . . 590 . . . . . 600 . . . . .

AF126284 BR/P05  
 H L P G V K H A Y R S M S L T L H A E H P T L L T T R H L G E N P Q P T A E W I  
 . . . . . 610 . . . . . 620 . . . . . 630 . . . . . 640 . . . . . R . . Y . . . . .

AF126284 BR/P05  
 V G S V T R N F S I T I Q G F E Y T W G N Q K P V R V Y A Q E S A P G N P H G W  
 . . . . . 650 . . . . . 660 . . . . . 670 . . . . . 680 . . . . . R R . . . . .

AF126284 BR/P05  
 P H E I V R H Y Y H L Y P F Y T V T V L S G M G L A I C A G L V I S I L C C C K  
 . . . . . 690 . . . . . 700 . . . . . 710 . . . . . 720 . . . . .

AF126284 BR/P05  
 A R R D C L T P Y Q L A P N A T V P F L V T L C C C F Q R T S A D E F T D T M G  
 . . . . . 730 . . . . . 740 . . . . . 750 6K └─▶ . . . . . 760 . . . . . A . . . . .

AF126284 BR/P05  
 Y L W Q H S Q T M F W I Q L V I P L A A V I T L V R C C S C C L P F L L V A S P  
 . . . . . 770 . . . . . 780 . . . . . 790 . . . . . 800 . . . . . G V . . . . .

AF126284 BR/P05  
 - P N K A D A Y E H T I T V P N A P L N S Y K A L V E R P G Y A P L N L E V M V  
 . . . . . 810 E1 └─▶ . . . . . 820 . . . . . 830 . . . . . 840 . . . . . L L T . . . . .

AF126284 BR/P05  
 M N T Q I I P S V K R E Y I T C R Y H T V V P S P Q I K C C G T V E C P K G E K  
 . . . . . 850 . . . . . 860 . . . . . 870 . . . . . 880 . . . . .

AF126284 BR/P05  
 A D Y T C K V F T G V Y P F L W G G A Q C F C D S E N S Q L S D K Y V E L S T D  
 . . . . . 890 . . . . . 900 . . . . . 910 . . . . . 920 . . . . . E A . . . . .

AF126284 BR/P05  
 C A T D H A E A V R V H T A S V K S Q L R I T Y G N S T A Q V D V F V N G V T P  
 . . . . . 930 . . . . . 940 . . . . . 950 . . . . . 960 . . . . .

AF126284 BR/P05  
 A R S K D M K L I A G P L S T T F S P F D N K V I I Y H G K V Y N Y D F P E F G  
 . . . . . 970 . . . . . 980 . . . . . 990 . . . . . 1000 . . . . .

AF126284 BR/P05  
 A G T P G A F G D V Q A S S T T G S D L L A N T A I H L Q R P E A R N I H V P Y  
 . . . . . 1010 . . . . . 1020 . . . . . 1030 . . . . . 1040 . . . . . H . . . . .

1050 1060 1070 1080  
AF126284 T Q A P S G F E F W K N N S G Q P L S D T A P F G C K V N V N P L R A D K C A V  
BR/P05 K

1090 1100 1110 1120  
AF126284 G S L P I S V D I P D A A F T R V S E - P L P S L L K C T V T S C T Y S T D Y G  
BR/P05 A A I A D

1130 1140 1150 1160  
AF126284 G V L V L T Y E S D R A G Q C A V H S H S S T A V L R D P S V Y V E Q K G E T T  
BR/P05 Q

1170 1180 1190 1200  
AF126284 L K F S T R S L Q A D F E V S M C G T R T T C H A Q C Q P P T E H V M N R P Q K  
BR/P05 A

1210 1220 1230 1240  
AF126284 S T P D F S S A I S K T S W N W I T A L M G G I S S I A A I A A I V L V I A L V  
BR/P05 T

AF126284 F T A Q H R \*  
BR/P05 \*



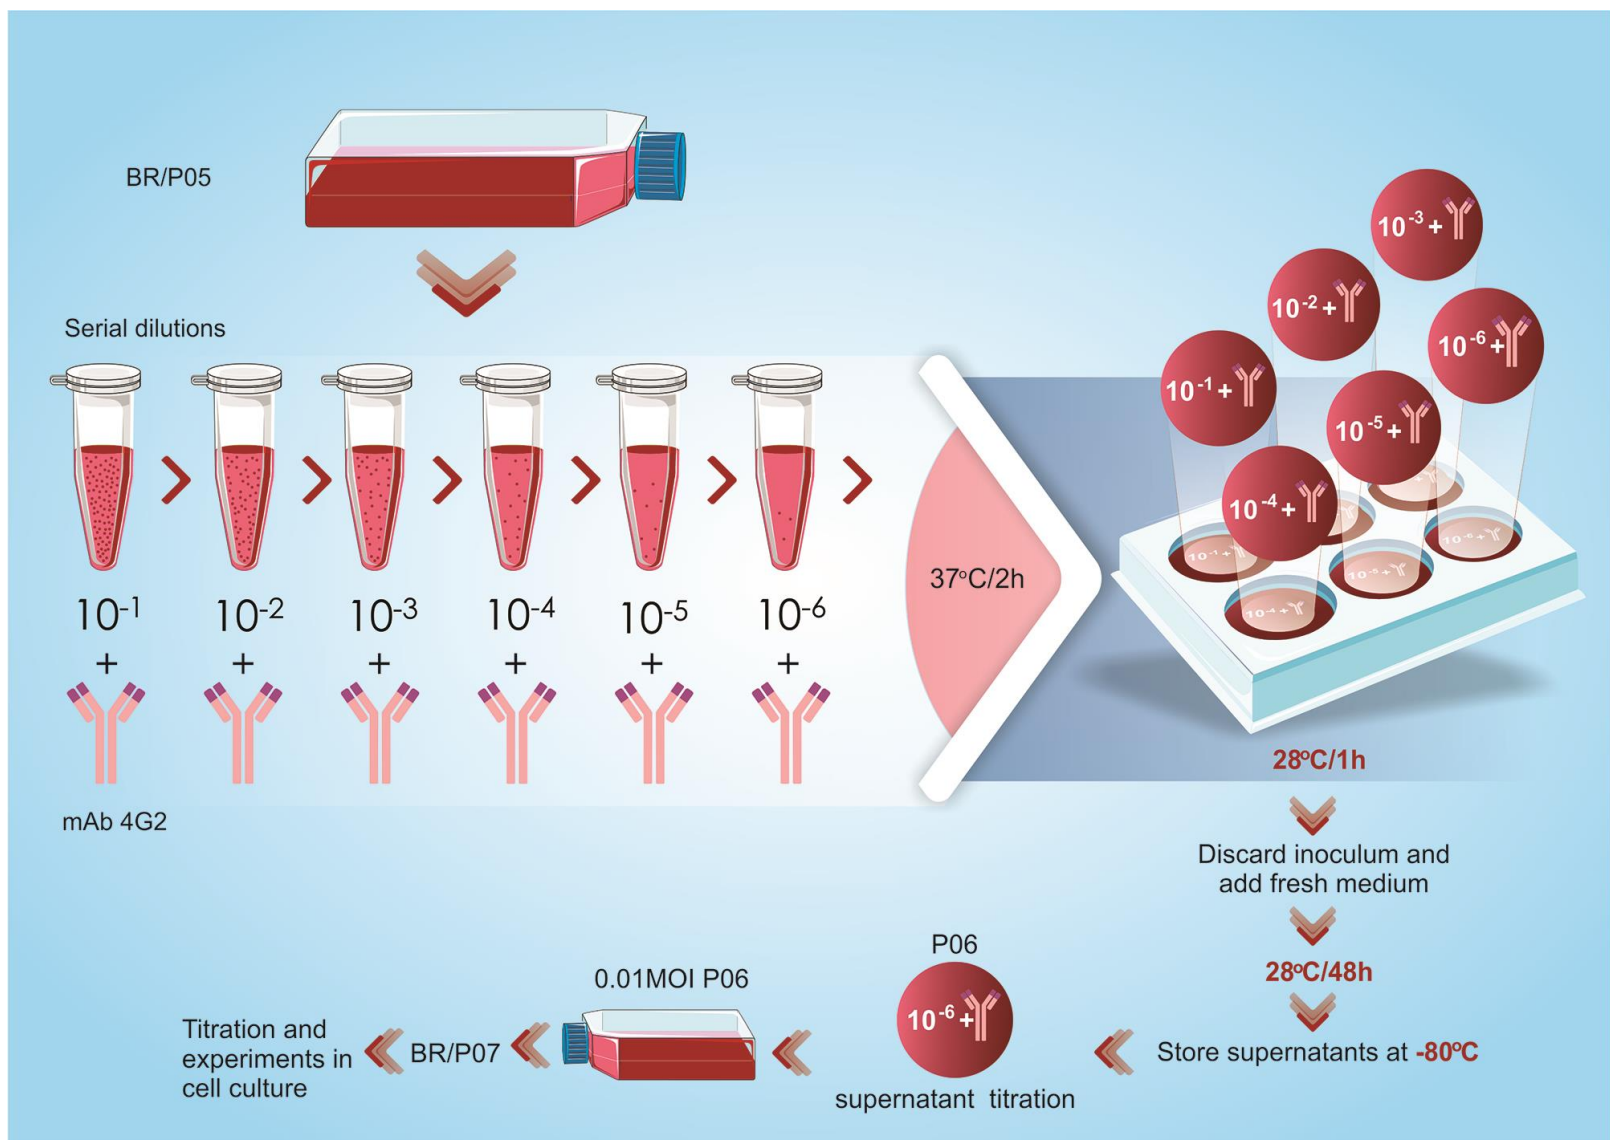

**Figure S1.** Workflow depicting the protocol used for DENV neutralization and production of the AURAV viral stock (BR/P07) from BR/P05. Different dilutions ( $10^{-1}$ - $10^{-6}$ ) of the supernatant of BR/P05 were incubated at 37 °C with an anti-flavivirus monoclonal antibody (4G2) for 2 h. This mixture was incubated with C6/36 cells ( $3.5 \times 10^5$  cells/well, seeded the day before in a 6-well plate) for 1 h at 28 °C. The inoculum was discarded, and the cell monolayer washed once with sterile PBS, after which 3 ml/well of medium added. The supernatants were collected at two days post-infection, aliquoted and stored at -80 °C. The supernatant of the infection (P06) that was carried out with the least amount of virus ( $10^{-6}$ ) was titrated and used to infect C6/36 cells at a multiplicity of infection (MOI) of 0.01 to produce the viral stock (BR/P07) for biological characterization experiments. Figure by Wagner Nagib de Souza Birbeire.

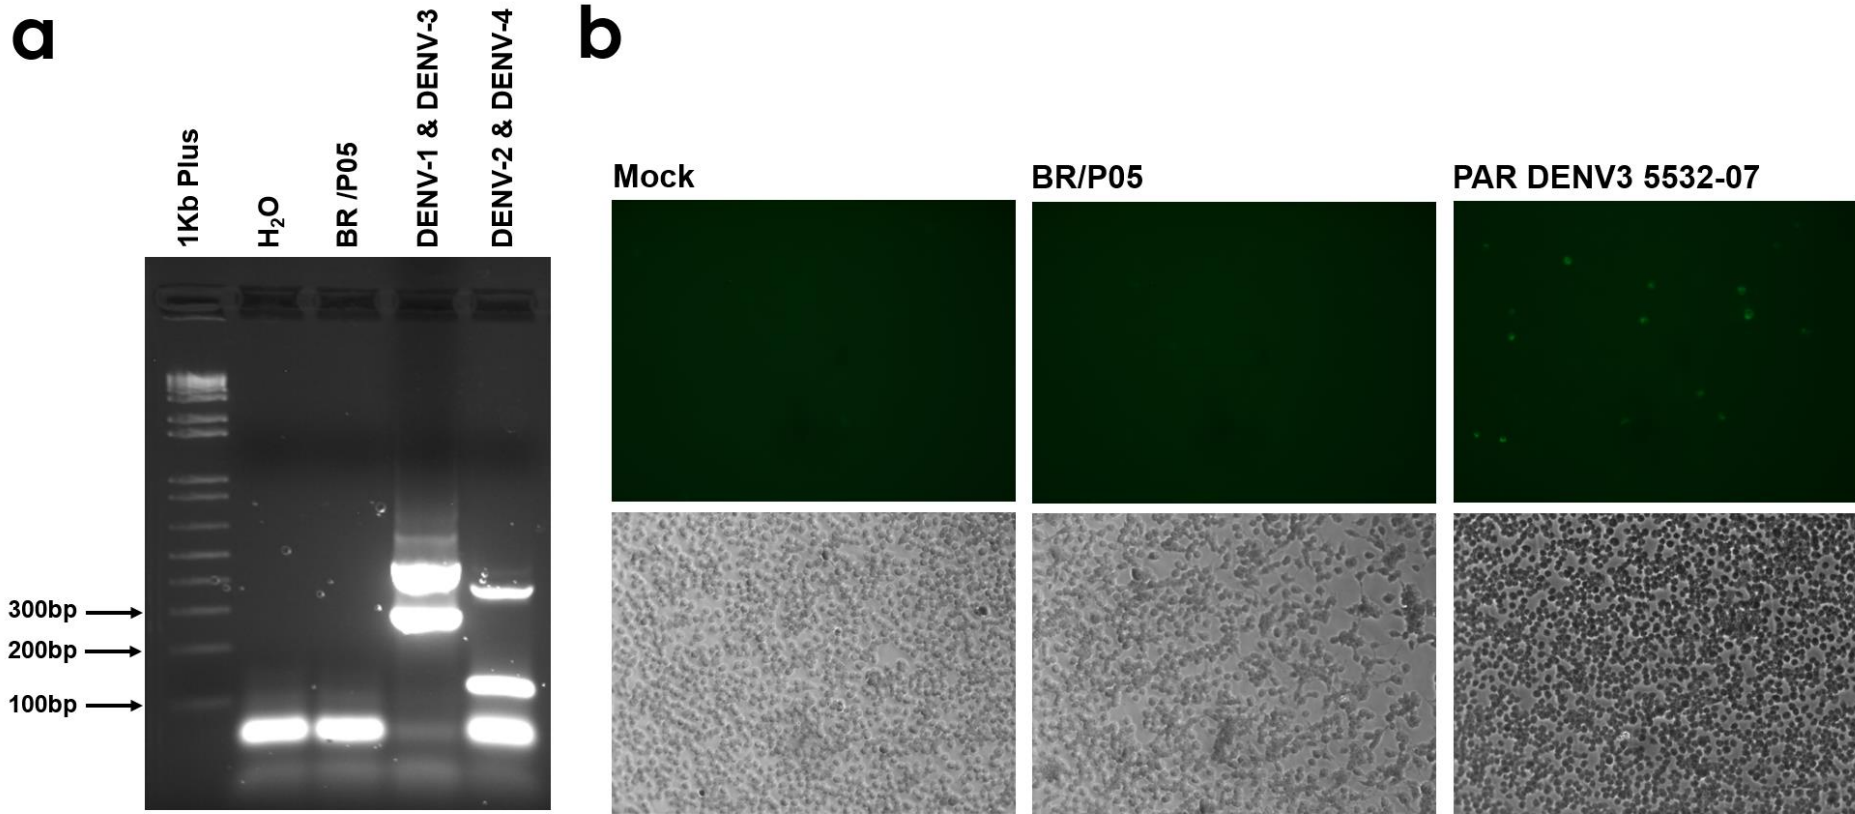

**Figure S2.** DENV detection in BR/P05. **a** One-step RT-PCR for DENV serotyping. RNA extracted from the supernatant of BR/P05 was used as the template. Water was used as negative control, and RNAs extracted from DENV-1, -2, -3 and 4 were used as positive controls. **b** IFA of C6/36 cells infected with the supernatant of BR/P05 at 2 days post-infection. Cells were fixed with 3% paraformaldehyde, permeabilized with 0.5% triton and incubated with an anti-flavivirus monoclonal antibody (4G2) followed by a goat anti-mouse IgG (H+L), Alexa Fluor 488 conjugate. Images were obtained at 200x magnification using a Nikon Eclipse TE300 inverted microscope attached to a CoolSNAP-ProCf camera and visualized and processed using Image-Pro Plus version 4.5.1.22 software.

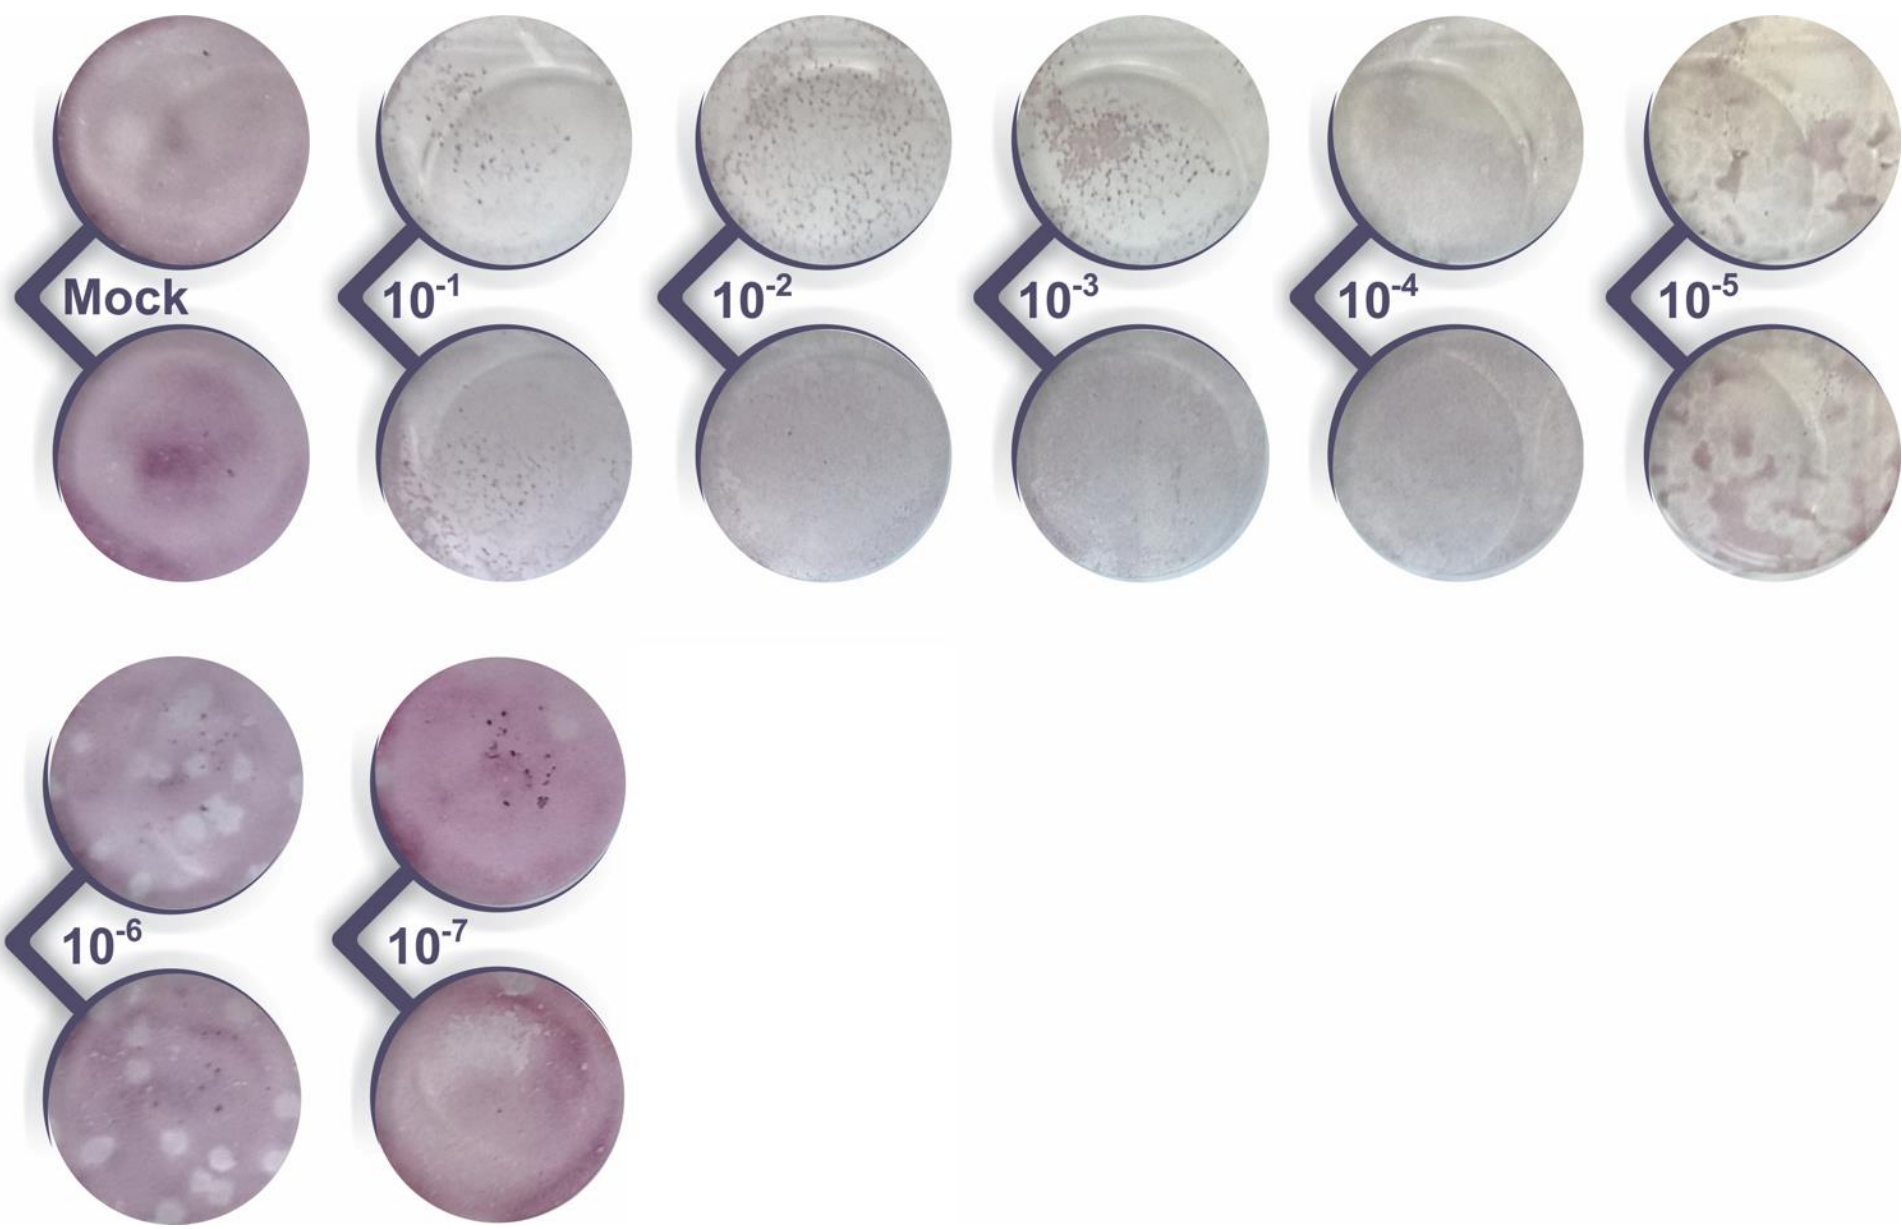

**Figure S3.** Result of BR/P07 titration by plaque assay in C6/36 cells.

**MOCK**

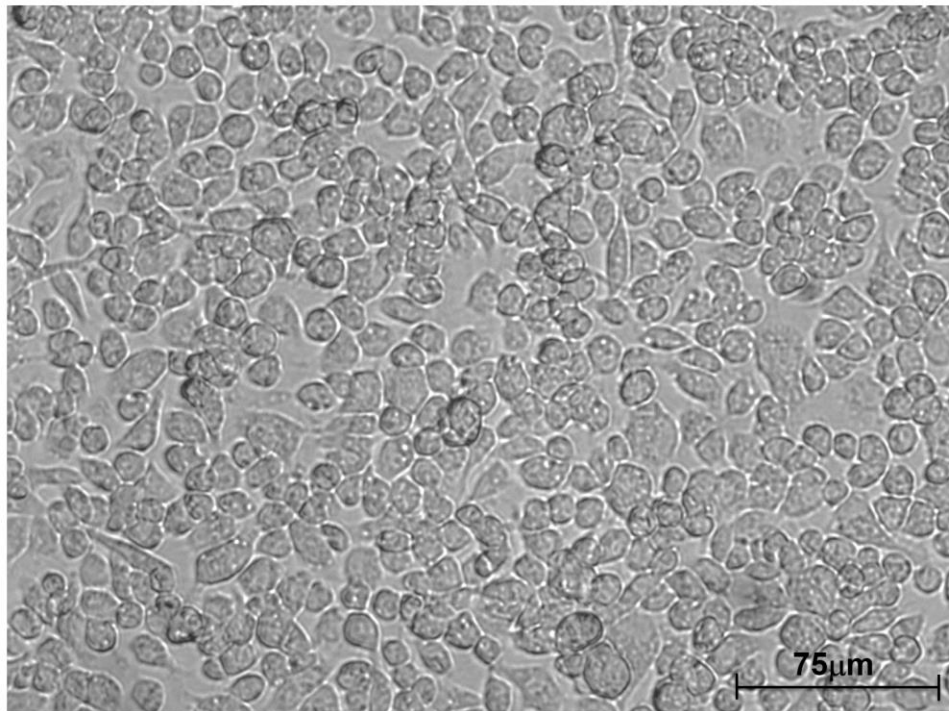

**BR/P07**

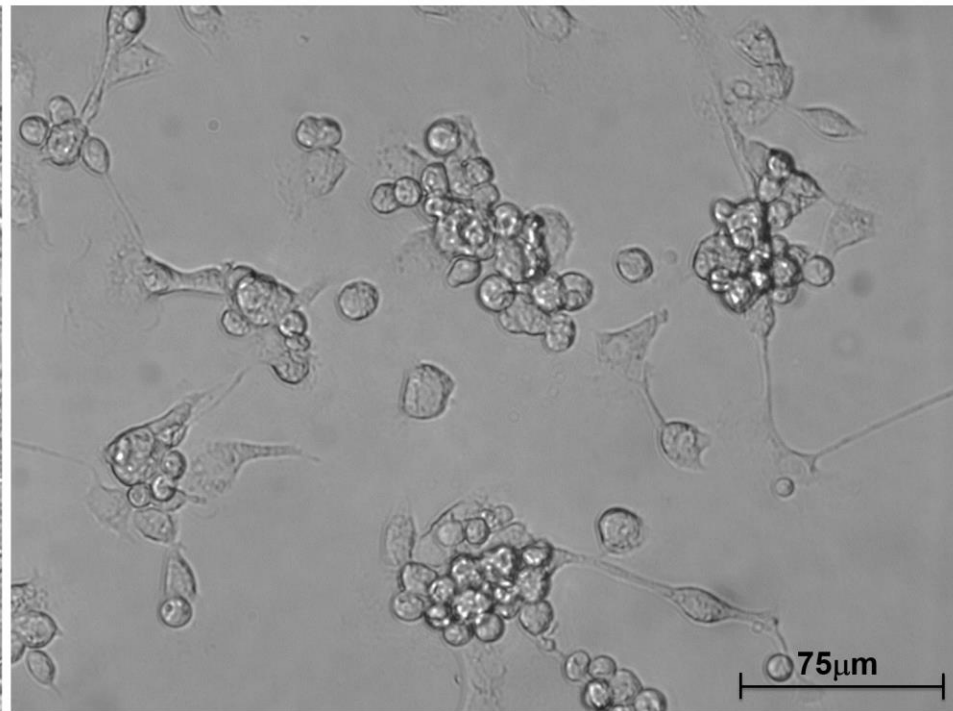

**Figure S4.** Brightfield images of C6/36 cells infected or not (mock) with 0.1 MOI of BR/P07 at 3 days post-infection. Images were obtained at 400x magnification using a Nikon Eclipse TE300 inverted microscope attached to a CoolSNAP-ProCf camera and visualized and processed using Image-Pro Plus version 4.5.1.22 software.

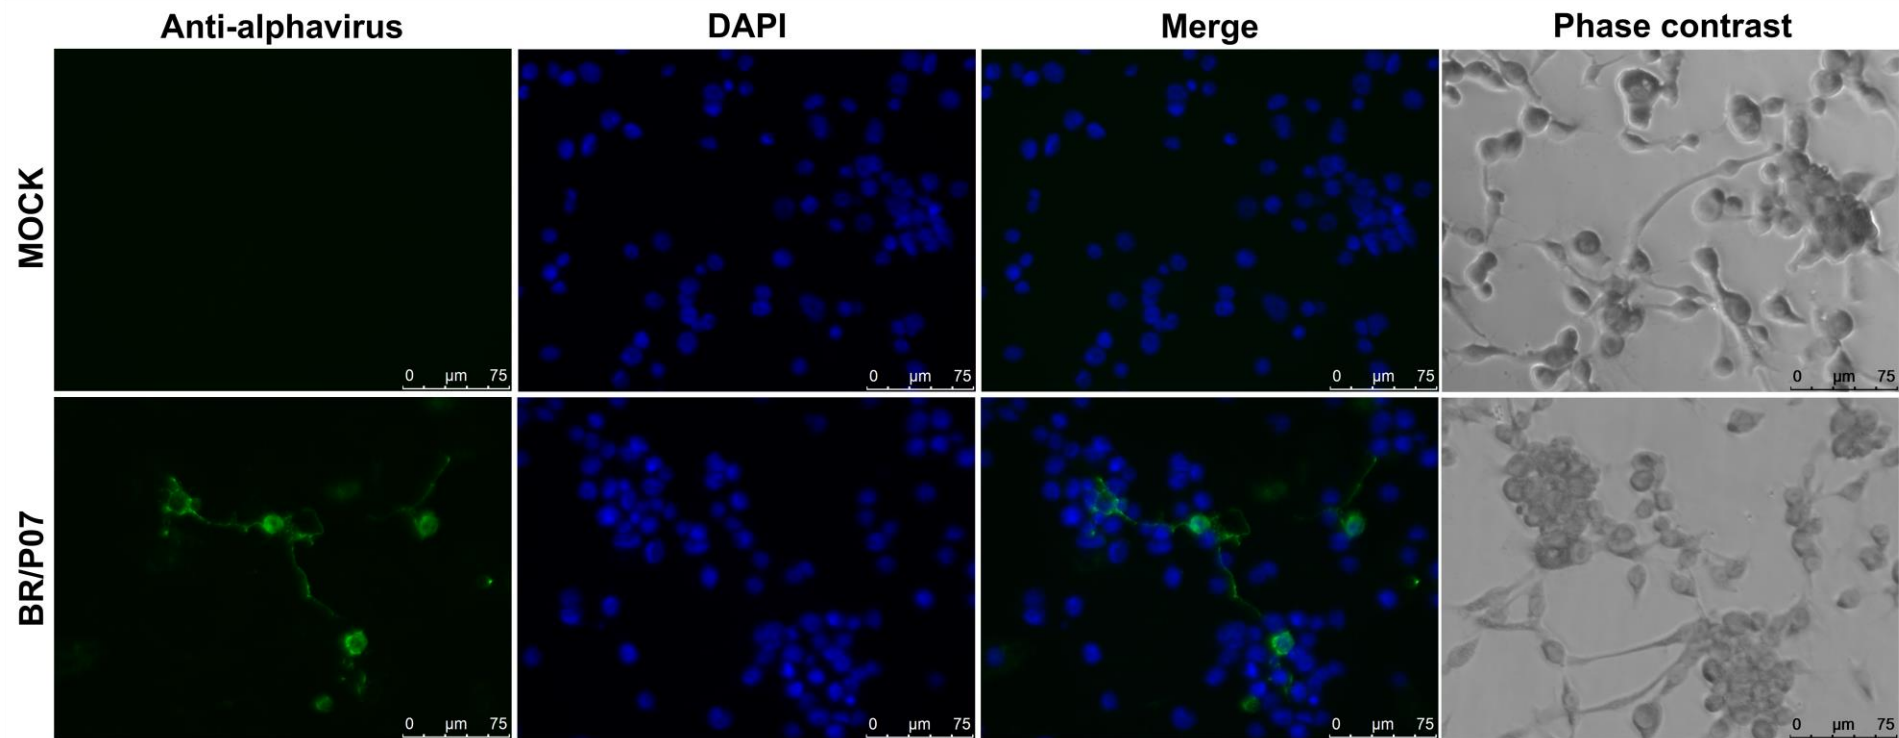

**Figure S5.** IFA of AP-61 cells infected or not (mock) with 1 MOI of BR/P07. At 3 days post-infection, the cell monolayer was fixed and permeabilized with methanol:acetone (1:1) at -20 °C and then incubated with an anti-alfavirus monoclonal antibody (mAb) clone 1A4B-6 followed by a goat anti-mouse IgG (H+L), Alexa Fluor 488 conjugate. Images were obtained using a Leica DMI 6000B inverted microscope attached to a Leica DFC365 FX camera and visualized and processed using Leica Application Suite Advanced Fluorescence 3.1.0 software.

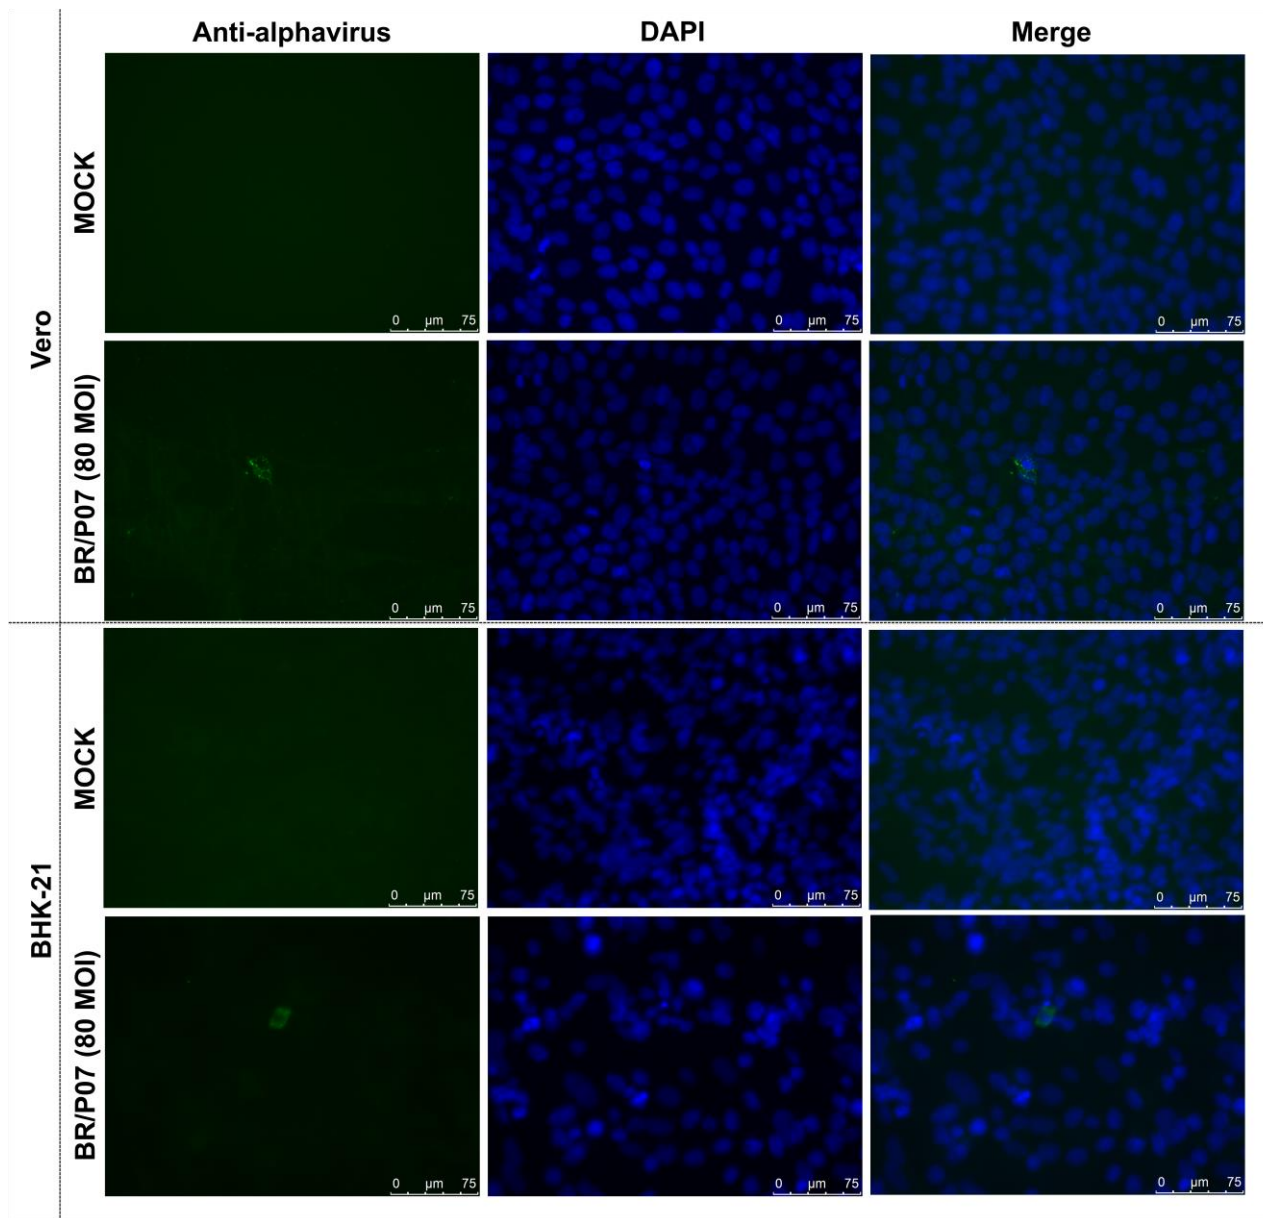

**Figure S6.** IFA of Vero and BHK-21 cells infected or not (mock) with 80 MOI of BR/P07. At 3 days post-infection, cell monolayers were fixed and permeabilized with methanol:acetone (1:1) at -20 °C and then incubated with an anti-alphavirus monoclonal antibody (mAb) clone 1A4B-6 followed by a goat anti-mouse IgG (H+L), Alexa Fluor 488 conjugate. Images were obtained using a Leica DMI 6000B inverted microscope attached to a Leica DFC365 FX camera and visualized and processed using Leica Application Suite Advanced Fluorescence 3.1.0 software.

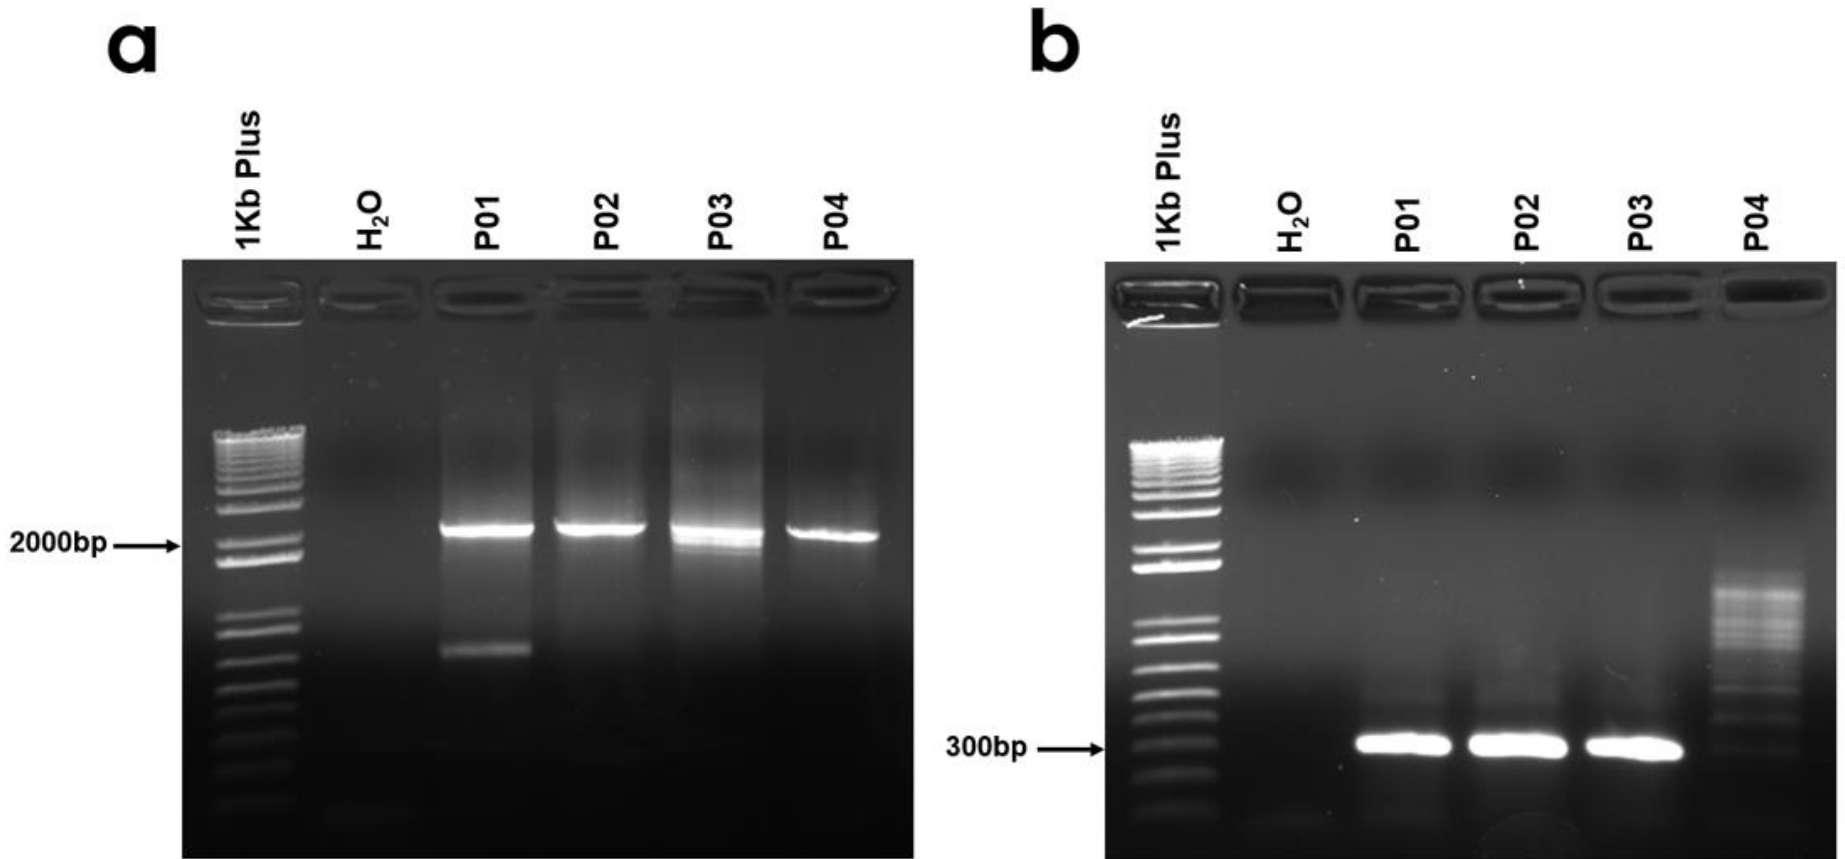

**Figure S7.** RT-PCR of P01-P04 for **a** AURAV and **b** DENV. RT-PCR was carried out following standard protocols. The primers used for AURAV testing were NsP3F and NsP3R (see Supplementary Table 2 for primer sequence). The primers used for DENV testing were D1 (5'-TCAATATGCTGAAACGCGCGAGAAACCG-3') and TS3 (5'-TAACATCATCATGAGACAGAGC-3'). The expected amplicon size for AURAV and DENV is 1995 bp and 290 bp, respectively.

## AF126284

ProtScale output for user sequence

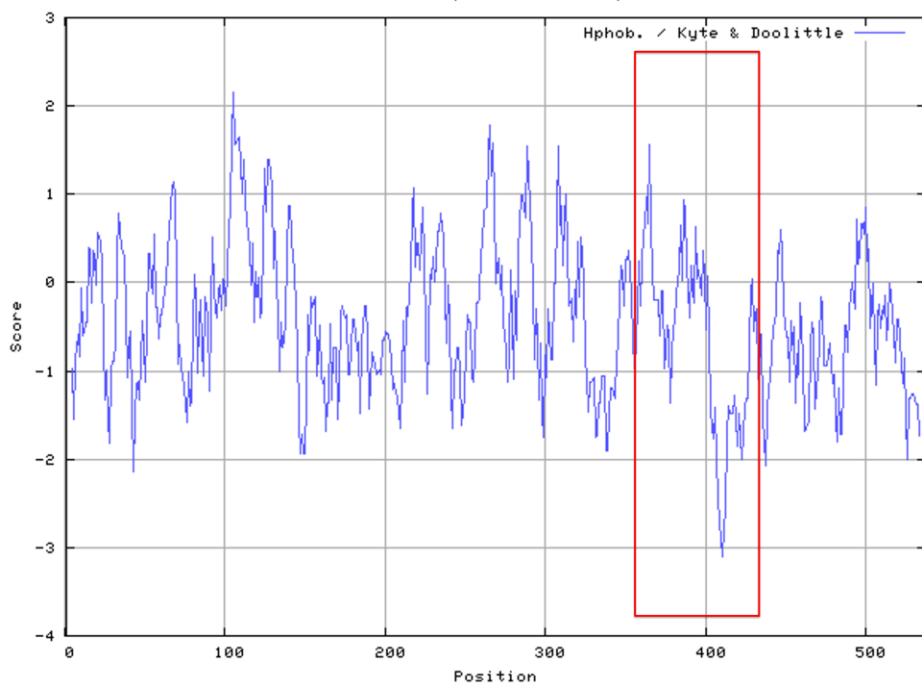

## BR/P05

ProtScale output for user sequence

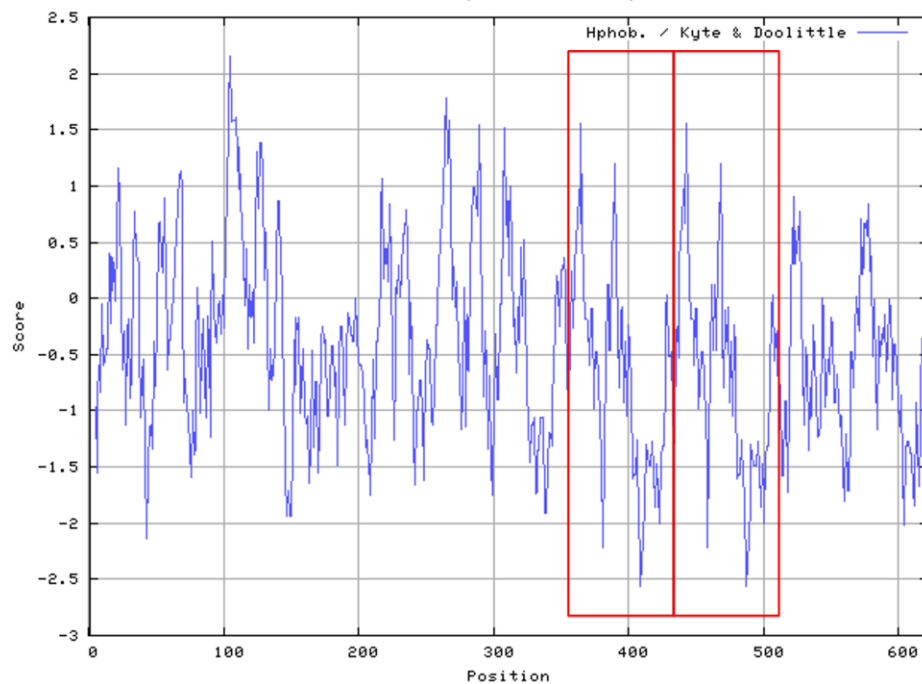

**Figure S8.** nsP3 hydrophobicity plot of AF126284 and BR/P05. The region corresponding to the duplication is highlighted by the red box. The Kyte & Doolittle hydrophobicity plot was drawn using the default settings, as available at the ProtScale website (<http://web.expasy.org/protscale/>).



**a**

| Score         | Expect | Identities                                                   | Gaps      | Strand    |
|---------------|--------|--------------------------------------------------------------|-----------|-----------|
| 176 bits(194) | 1e-45  | 149/181(82%)                                                 | 2/181(1%) | Plus/Plus |
| AF126284      | 5415   | CTAAACGAGCTACGGAGGCATGCGACGATATCCTCCGTTCAAGCTGAGGTACACTACAAT | 5474      |           |
|               |        |                                                              |           |           |
| AF126284      | 5238   | CTAAACGAGCCTGCGAGGCACGTAATGATATCCTC-GTTCAAGCTGAGGTACACTGCGAT | 5296      |           |
| AF126284      | 5475   | TCAGGTTTTACCCAGAAAGCCGAATTGAATGAGAGAGGATCG-ATACTGAGGAAGCCGCC | 5533      |           |
|               |        |                                                              |           |           |
| AF126284      | 5297   | CCAGGCTTTACCTCAGAAGCTGAGTTGGATGAGAGAGGATCGCACACCGAGACAGCCGCC | 5356      |           |
| AF126284      | 5534   | TCCCGTACCGCCACTACGACCAAACAAACTACGAACTTATCTCGACTCGCAAACCAACT  | 5593      |           |
|               |        |                                                              |           |           |
| AF126284      | 5357   | TCCTGTACCGCCACCACGACCAAACGAGCCGCGAAATTATCCCGACTAGCAAACCAGCT  | 5416      |           |
| AF126284      | 5594   | A                                                            | 5594      |           |
|               |        |                                                              |           |           |
| AF126284      | 5417   | A                                                            | 5417      |           |

**b**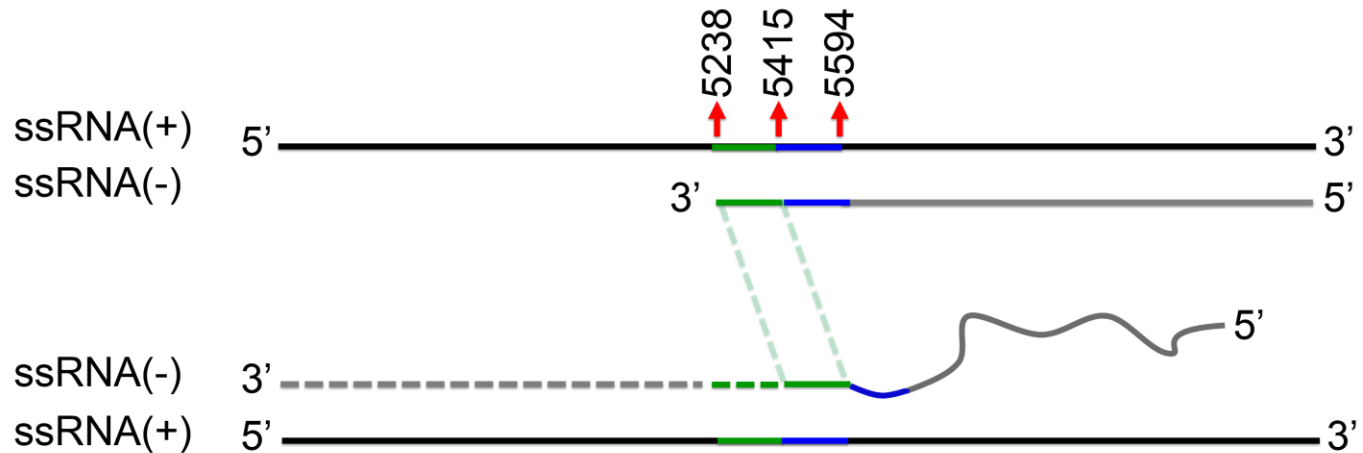

**Figure S9.** Mechanism of duplication hypothesis. **a** Partial results of BLAST 2 sequences search of AF126284 against itself. **b** Possible mechanism involved in the duplication. During the synthesis of the negative strand, one of these segments in the negative strand (represented in green) might hybridize with the neighboring segment in the positive strand (represented in blue), resulting in duplication of the segment represented in green (green dashed line).

**Table S1**  
BLAST analyses of DOP-PCR sequencing results

| Clone             | Region of homology with AF126284 | Identity | E-value              |
|-------------------|----------------------------------|----------|----------------------|
| MP1               | 6413-6772                        | 99%      | 8.10 <sup>-176</sup> |
| MP3               | 6413-6796                        | 99%      | 0.0                  |
|                   | 7826-7884                        | 100%     | 2.10 <sup>-19</sup>  |
| MP5               | 8715-9366                        | 99%      | 0.0                  |
| MP7               | 7463-7884                        | 98%      | 0.0                  |
| MP9               | 7398-7885                        | 98%      | 0.0                  |
| MP11 <sup>1</sup> | -                                | -        | -                    |
| MP13              | 7463-7884                        | 98%      | 0.0                  |
| MP15              | 6413-6599                        | 98%      | 9.10 <sup>-85</sup>  |
|                   | 10326-10394                      | 94%      | 1.10 <sup>-19</sup>  |
| MP17              | 6413-7884                        | 99%      | 0.0                  |
| MP19              | 7463-7884                        | 98%      | 0.0                  |
| MP21              | 8715-9366                        | 99%      | 0.0                  |
| MP23              | 7463-7884                        | 98%      | 0.0                  |
| MP25              | 8715-9363                        | 99%      | 0.0                  |
| MP27              | 7463-7885                        | 97%      | 0.0                  |
| MP31              | 7463-7884                        | 98%      | 0.0                  |
| MP33              | 4385-5118                        | 98%      | 0.0                  |
| MP35              | 7409-7886                        | 99%      | 0.0                  |
| MP37              | 7463-7884                        | 98%      | 0.0                  |

<sup>1</sup>Blast hits presented low coverage (<17%) and high E-values (>0.11)

**Table S2**  
Primers used in RT-PCR and sequencing

| Primer   | Sequence (5' → 3')              | Position (AF126284) |
|----------|---------------------------------|---------------------|
| AURAV1F  | ATAGCGGACGGACTAGTACTTGTACTAC    | 1-28                |
| AURAV2R  | TAGGGCCTGATGGTAAATGGTC          | 581-560             |
| AURAV3F  | GGTCAAAGGGGAGCGTGTATCGTTC       | 1040-1064           |
| AURAV4R  | ATAGTTCTGCATCGTGTGGTGGTTCT      | 1226-1200           |
| AURAV5F  | TAGATGCCAGAAAATGCGTAAAAAGAG     | 2101-2127           |
| AURAV6R  | ATAGTCATTCCCCGCATTTTCTGG        | 2380-2357           |
| AURAV7F  | AATGACCAACCTTACTCCGTGATGT       | 3225-3249           |
| AURAV8R  | GTATTTGGTCCCCTTTTCTGCTCTTA      | 3474-3448           |
| AURAV9F  | GTTGGAGGAAGCGACGAAGCTA          | 4343-4364           |
| AURAV10R | ATCTGCTATGCGTTGCTCCCCTT         | 4574-4551           |
| AURAV11F | AACGAGCTACGGAGGCATGCGACGATA     | 5418-5444           |
| AURAV12R | CCAAACGTAGGGGTTCGGTGATG         | 5674-5653           |
| AURAV13F | GCAGCACTATTCGCAAAGACACATCGA     | 6537-6563           |
| AURAV14R | GGTCTGCTGCTTGAATAACTTGT         | 6691-6668           |
| AURAV15F | CACTACGCGGGAGCCCAAGACACCT       | 7534-7558           |
| AURAV16R | TAGTGAGCTGTTGGATCTGGGTAG        | 7760-7737           |
| AURAV17F | GTTCTGCTGGACGCTGCTCTGA          | 8564-8585           |
| AURAV18R | CGTCATCGGCATCATCCCACAC          | 8735-8714           |
| AURAV19F | CACCTCTATCCCTTCTACACCGTTACA     | 9695-9721           |
| AURAV20R | CATTGTTTGACTGTGTTGCCATAGGTA     | 9934-9908           |
| AURAV21F | CCGGATCAGATCTATTAGCAAACACAGC    | 10671-10698         |
| AURAV22R | GGCTCGGATACGCGTGTAAATGCAG       | 10923-10899         |
| AURAV23F | GCTGCTATAGCCGCAATTGTGCTGG       | 11303-11327         |
| AURAV24R | GAAATATTA AAAACAAAATTTTGAAATAAT | 11824-11795         |
| Nsp3F    | GATCGTGAGCGCCAATTCAC            | 4029-4048           |
| Nsp3R    | TTTTTGTTCAGATGCCCG              | 5789-5770           |
| DOP      | CCGACTCGAGINNNNNNTGTGG          | not applicable      |

**Table S3**  
Dataset used in the phylogenetic analysis

| <b>GenBank Accession number</b> | <b>Abbreviation</b> | <b>Name</b>                                                                                                   |
|---------------------------------|---------------------|---------------------------------------------------------------------------------------------------------------|
| AJ316244                        | SPDV                | Salmon pancreas disease virus complete genome, isolate F93125, genomic RNA                                    |
| AJ316246/NC003433               | SDV                 | Sleeping disease virus complete genome                                                                        |
| HM147990                        | SESV                | Southern elephant seal virus, complete genome                                                                 |
| U73745                          | BFV                 | Barmah Forest virus strain BH2193, complete genome                                                            |
| EF536323                        | MIDV                | Middelburg virus strain MIDV857 non-structural polyprotein and structural polyprotein genes, complete cds     |
| HM147989                        | NDUV                | Ndumu virus, complete genome                                                                                  |
| AB032553                        | SAGV                | Sagiyama virus genomic RNA, complete genome                                                                   |
| AY702913                        | GETV                | Getah virus from South Korea, complete genome                                                                 |
| GQ433354                        | RRV                 | Ross River virus strain QML 1, complete genome                                                                |
| HM147985                        | BEBV                | Bebaru virus, complete genome                                                                                 |
| NC_003417                       | MAYV                | Mayaro virus, complete genome                                                                                 |
| HM147992                        | UNAV                | Una virus non structural polyprotein gene, partial cds; and structural polyprotein gene, complete cds         |
| HM045788                        | CHIKV               | Chikungunya virus strain PO731460, complete genome                                                            |
| AF079456                        | ONNV                | O'nyong-nyong virus strain SG650, complete genome                                                             |
| L01442                          | VEEV IAB            | Venezuelan equine encephalitis virus, complete genome                                                         |
| AF375051                        | VEEV IC             | Venezuelan equine encephalitis virus nonstructural polyprotein and structural polyprotein genes, complete cds |
| L00930                          | VEEV ID             | Venezuelan equine encephalitis virus strain 3880, complete genome                                             |
| U34999                          | VEEV IE             | Venezuelan equine encephalitis virus nonstructural and structural polyprotein genes, complete cds             |
| AF075257                        | VEEV IF             | Venezuelan equine encephalitis virus strain 78V-3531, complete genome                                         |
| AF075251                        | EVEV                | Venezuelan equine encephalitis virus strain Everglades Fe3-7c, complete genome                                |
| AF075254                        | TONV                | Venezuelan equine encephalitis virus strain Tonate CaAn 410d, complete genome                                 |
| AF075253                        | MUCV                | Venezuelan equine encephalitis virus strain Mucambo BeAn 8, complete genome                                   |
| AF075255                        | VEE<br>71D1252      | Venezuelan equine encephalitis virus strain 71D-1252, complete genome                                         |
| AF075256                        | PIXV                | Venezuelan equine encephalitis virus strain Pixuna BeAr 35645, complete genome                                |
| AF075259                        | CABV                | Venezuelan equine encephalitis virus strain Cabassou CaAr 508, complete genome                                |
| AF075258                        | RNV                 | Venezuelan equine encephalitis virus strain AG80-663, complete genome                                         |
| EF151502                        | EEEV LinI           | Eastern equine encephalitis virus strain FL93-939, complete genome                                            |
| DQ241303                        | EEEV LinII          | Eastern equine encephalitis virus strain PE-3.0815, complete genome                                           |
| DQ241304                        | EEEV_LinIII         | Eastern equine encephalitis virus strain PE-0.0155, complete genome                                           |
| EF151503                        | EEEV_LinIV          | Eastern equine encephalitis virus strain BeAr436087, complete genome                                          |

|           |                 |                                                                                                          |
|-----------|-----------------|----------------------------------------------------------------------------------------------------------|
| HM147991  | TROV            | Trocar virus non structural polyprotein gene, partial cds; and structural polyprotein gene, complete CDs |
| NC_018615 | EILV            | Eilat virus isolate EO329, complete genome                                                               |
| AF126284  | AURAV           | Aura virus polyprotein 1 and polyprotein 2 genes, complete CDs                                           |
| NC001547  | SINV            | Sindbis virus, complete genome                                                                           |
| M69205    | SINV<br>Ockelbo | Ockelbo virus strain Edsbyn, complete genome                                                             |
| HM147984  | SINV<br>Babanki | Babanki virus, complete genome                                                                           |
| AF103728  | SINV XJ160      | Sindbis virus strain XJ-160, complete genome                                                             |
| AF429428  | SINV<br>SW6562  | Sindbis virus isolate SW6562, complete genome                                                            |
| HM147993  | WHATV           | Whataroa virus, complete genome                                                                          |

## Supplementary sequence data

In red: pGEM-T-easy sequence

>MP1

GCGTGGGCGGAATCGCATGCTCCGGGCCGCTGGCGGCCGCGGGAATTCG  
ATTCGACTCGAGGGACTGGTGTGGAGTGCTTTAAAAAGTATGCATGTAA  
TACAGACTACTGGGAAGAATTTAAAGAGAAACCAATAAGAATAACAACAG  
AGTGTGTCACCTCATACGTGGCCGATTAAGGACCGAAGGCTGCAGCA  
CTATTCGCAAAGACACATCGACTGGTCCCGCTACAGGAGGTCCCTATGGA  
TAGGTTTGTAAATGGACATGAAAAGAGATGTAAAGGTGACACCCGGCACTA  
AACATACCGAAGAGCGTCCCAAGGTACAAGTTATTCAAGCAGCAGAACCA  
CTGGCCACGGCTTACTTGTGCGGTATACACCGGGAGCTAGTACGGAGGCT  
TACAGCAGTACTGTTACCTAACATCCACACGCCATCCTCGAGTCGGAATC  
ACTAGTGAATTCGCGGCCGCTGCAGGTCGACCATATGGGAGAGCTCCCA  
ACGCGTTGGATGCATAGCTTGAGTATTCTATAGTGTACCTAAATAGCTT  
GGCGTAATCATGGTCATAGCTGTTCCCTGTGTGAAATTGTTATCCGCTCA  
CAATTCCACACAACATACGAGCCGGAAGCATAAAGTGTAAAGCCTGGGGT  
GCCTAATGAGTGAGCTAACTCACATTAATTGCGTTGCGCTCACTGCCCCG  
TTTCCAGTCGGGAAACCTGTCTGCGCAGCTGCATTAATGAATCGGCCAAC  
GCGCGGGGAGAGGCGGTTTGCCTATTGGGCGCTCTTCCGCTTCTCGCTC  
ACTGACTCGCTGCGCTCGGTTCGGCTGCGGCGAGCGGTATCAGCTCA  
CTCAAAGGCGGTAATACGGTTATCCACAGAATCAGGGGATAACGCAGGAA  
AGAACATGTGAGCAAAAGGCCAGCAAAAGGCCAGGAACCGTAAAAAGGCC  
GCGTTGCTGGCGTTTTTCCATAGGCTCCGCCCCCTGACGAGCATCACAA  
AAATCGACGCTCAAGTCAGAGGTGGCGAAACCCGACAGGACTATAAAGAT  
ACCAGGCGTTTCCCCCTGGAAGCTCCCTCGTGCCTCTCCTGTTCCGACC  
CTGCCGCTTACCGGATACCTGTCCGCTTTCTCCCTTCGGGAAGCGTGGC  
GCTTTCTCATAGCTCACGCTGTAGGATCTCAGTTCGGGTGGAGGGCGTT  
CCCTCCAAGCTGGGCTGGGGGGCCGAACCCCCGTTTCAGCCCGACCGGTG  
GGCCTTATCCGGGAACCTATCGGCTTGAGTCCAACCCGGGAAGAACAGATT  
TATCGCCCTGGGGGCACCCACTGTTAAAAAGGTTTTCCAAACCCAGGGAGG  
TAGGCGGGGTTACAGTTTTTGAAGGGGGCGTATAACGTCCCCCAA  
AAAACAATTTGTTTTGCTCCTCTGAACCATACCTCCCAAAAAAAGGA  
GGTCTTTTCGGGAAAAAACCCCCCGGGGTGTTTTTTTTTTTTTAA  
CAACAAAAAAGAAAAAATAAAAAATTAATGTTGTCCCTT

>MP3

GGATGGGCGGAATCCATGCTCCGGGCCGCTGGCGGCCGCGGGAATTCGAT  
TCCGACTCGAGGGGGGGTGTGGAGTGCTTTAAAAAGTATGCATGTAATA  
CAGACTACTGGGAAGAATTTAAAGAGAAACCAATAAGAATAACAACAGAG  
TGTGTCACCTCATACGTGGCCGATTAAGGACCGAAGGCTGCAGCACT  
ATTCGCAAAGACACATCGACTGGTCCCGCTACAGGAGGTCCCTATGGATA  
GGTTTGTAAATGGACATGAAAAGAGATGTAAAGGTGACACCCGGCACTAAA  
CATACCGAAGAGCGTCCCAAGGTACAAGTTATTCAAGCAGCAGAACCCT  
GGCCACGGCTTACTTGTGCGGTATACACCGGGAGCTAGTACGGAGGCTTA  
CAGCAGTACTGTTACCTAACATCCATACACTATTTCGACATGTCTGCCGAG  
GAAGCCGAAGACTCAAAAACCTAAGCCGAAGAAGCAAAACCAGAAACCAC  
CACACCTCTGCCTCGAGTCGGAATCACTAGTGAATTCGCGGCCGCTGCA  
GGTCGACCATATGGGAGAGCTCCCAACGCGTTGGATGCATAGCTTGAGTA  
TTCTATAGTGTACCTAAATAGCTTGGCGTAATCATGGTCATAGCTGTTT  
CCTGTGTGAAATTGTTATCCGCTCACAAATCCACACAACATACGAGCCGG  
AAGCATAAAGTGTAAAGCCTGGGGTGCCTAATGAGTGAGCTAACTACAT  
TAATTGCGTTGCGCTCACTGCCCCGTTTCCAGTCGGGAAACCTGTCTGTC  
CAGCTGCATTAATGAATCGGCCAACGCGCGGGGAGAGGCGGTTTGCCTAT  
TGGGCGCTCTTCCGCTTCTCGCTCACTGACTCGCTGCGCTCGGTTCGTT  
GGCTGCGGCGAGCGGTATCAGCTCACTCAAAGGCGGTAATACGGTTATCC  
ACAGAATCAGGGGATAACGCAGGAAAGAACATGTGAGCAAAAGGCCAGCA  
AAAGGCCAGGAACCGTAAAAAGGCCGCGTTGCTGGCGTTTTTCCATAGGC  
TCCGCCCCCTGACGAGCATCAAAAAATCGACGCTCAAGTCAGAGGTGG

CGAAACCCGACAGGACTATAAAGATACCAGGCGTTTCCCCCTGGAAGCTC  
CCTCGTGCCTCTCCTGTTCCGACCCTGCCGTTACCGGAAACCTGTCCG  
CCTTCTCCCTTCGGGAAGCGGGGGCTTTTCTAAGTCACGCTGGAGGG  
TTTCCAGTTCCGGGAAGGCGTTCGCTCCAACCTGGGGCTGTTGGCCAAAC  
CCCCGTTAACCCGAACGGTGGCCCTTACCCGGAAAAATTTTTTTGGGCA  
ACCCGGGAAAAACCAATATCCCCTTGGGGGGCCCCCTGGAAAGGGTTAA  
AAAAAGAGGGATGTGGGGGGGCCCAATTTTTTTATGGGGGGGGCCCCC  
CCCCCAAAAA

>MP5

GGGTGGCCACGTCCATGCTCCCGCCGCCTGGCGGCCGCGGAATTCGA  
TTCCGACTCGAGGTAGCGCTGTGGGATGATGCCGATGACGGAGTTCTCCG  
TATACAAGTAAGTGCCAGTTAGGGTACAACAGGGCGGGCACTGCAGCTA  
GCGCCGACTCCGGTTCATGGGCGGAGGAGTGCCTCCGGAAATCCAGGAG  
GGAGCAATTGCAGATTTTAAGGTCTTACGTCTAAACCATGTTTACACCT  
ATCACATAAAGGATACTTTGTCAATTGTCAAGTGCCCTCTGGTGATAGTA  
TTACAACATCATTGAAAGTACATGGCTCGGATCAAACCTGCACAATTCCA  
ATGCGAGTAGGTTACAAGTTCGTAGGCAAGGAAAAATATACTCTGCCACC  
AATGCATGGGACACAAATACCTTGCCCTTACCTACGAAAGGACACCAGAGA  
AAAGTGCAGGATACGTGACCATGCATCGTCCCGACAACAATCCATAACC  
ATGCTGATGGAAGAGAGCGGAGGGGAGGTGTACGTACAACCGACCAGTGG  
GCGAAACGTCACCTACGAGTGTAATGCGGAGACTTTAAAACCTGGGACTG  
TCACTGCGCGACTAAGATAGACGGCTGTACAGAAAGGAAACAATGCATT  
GCGTATTTCCGCCACCACGTCAAATGGGTGTTTAACTCCCCTGACTTGAT  
CAGGCATACCGACCACACAGCATCCTCGAGTCGGAAATCACTAGTGAATTC  
GCGGCCGCCTGCAGGTCCGACCATATGGGAGAGCTCCCAACGCGTTGGATG  
CATAGCTTGAGTATTCTATAGTGTACCTAAATAGCTTGGCGTAATCATG  
GTCATAGCTGTTTCTGTGTGAAATTGTTATCCGCTCACAATTCCACACA  
ACATACGAGCCGGAAGCATAAAGTGTAAGCCTGGGGTGCCTAATGAGTG  
AGCTAACTCACATTAATTGCGTTGCGCTCACTGCCCGCTTTCCAGTCGGG  
AAACCTGTCGTGCCAGCTGCATTAATGAATCGGCCAACGCGCGGGGAGAG  
GCGGTTTTCGTATTGGGCGCTCTTCCGCTTCTCGCTCACTGACTCGCTG  
CGCTCGGTTCGTTCCGGTGCGGCGAGCGGTATCAGCTCACTCAAAGGCGGG  
AATACGGTTATCCACAGAATCAGGGGATAACGCAGGAAAGAACATGGGAG  
CAAAAGGCCCGCAAAAAGGCCCGGAACCGTAAAAAGGCCCGTTGCTGGCGT  
TTTTTAAAGGCTCCCGCCCCGTGACAAACTTCCAAAAATCCACCCTCAAT  
CAAAAGTGGCGAAACCCCCAGGACTTAAAAATCCACGGGTTCTCCGGAA  
GACCCCCGGGGGCTCCTTGTTAACCCCGCCTTACAGAAAATGGCCCCCTT  
CCTTTTTGGAAGAGAGGGTTCTTATTCACCACGAGGGTTCAATTTTTTG  
GGGGTGTCCACACCGGTGGGGGGAACCCCCACCCACCCACCGCCCCCTCA  
ATTAATATTTATTTTTAAGATATATTCTTAACCCCCCCCCAAAAACAA  
AAAACAAAAAAGGGGGGGTGTGTTGTTGTGGGT

>MP7

GGTAGGCCGACTCGCATGCTCTCGGCCGCATGGCGGCCGCGGAATTCG  
ATTCGACTCGAGGGGCTTCTGTGGTACAAGAGGTTTCAGCCAGTGCTGTT  
AGCCCTCGCTACGTTCTCGCTAGCGATAAAGCATTAAAGCACTACGCG  
GGAGCCCAAGACACCTCTACGGTGGTCCTAAATAGACGGTGTAGCACAGT  
AGATCGTCTAAATTATTCACATCTTACGTTACTATGAACTCTGTCTTT  
TACAATCCGTTTGGTTCGAGGTGCCTACGCTCAACCTCCAATAGCATGGAG  
GCCAAGACGTAGGCGTGCACCTGCGCCTCGACCATCCGGGTTGACTACCC  
AGATCCAACAGCTCACTAGGGCTGTTGGAGCTTTGGTGCTGGACAATGCT  
ACACGTGCGCAGCGCCCGGCTCCTCGCACGGCGCCGAGGAAGCCGAAGAC  
TCAAAAACCTAAGCCGAAGAAGCAAAACCAGAAACCACACCTAACC  
TCGAGTCGGAATCACTAGTGAATTCGCGGCCGCCTGCAGGTCCGACCATAT  
GGGAGAGCTCCCAACGCGTTGGATGCATAGCTTGAGTATTCTATAGTGT  
ACCTAAATAGCTTGGCGTAATCATGGTCATAGCTGTTTCTGTGTGAAAT  
TGTTATCCGCTCACAATTCCACACAACATACGAGCCGGAAGCATAAAGTG  
TAAAGCCTGGGGTGCCTAATGAGTGAGCTAACTCACATTAATTGCGTTGC  
GCTCACTGCCCGCTTCCAGTCGGGAAACCTGTCGTGCCAGCTGCATTA

TGAATCGGCCAACGCGCGGGGAGAGGGCGGTTTGCCTATTGGGCGCTCTTC  
CGCTTCCTCGCTCACTGACTCGCTGCGCTCGGTCGTTTCGGCTGCGGGCAG  
CGGTATCAGCTCACTCAAAGGCGGTAATACGTTATCCACAGAATCAGGG  
GATAACGCAGGAAAGAACATGTGAGCAAAAGGCCAGCAAAAGGCCAGGAA  
CCGTA AAAAGGCCGCGTTGCTGGCGTTTTCCATAGGCTCCGCCCCCTGA  
CGAGCATCACAAAATCGACGCTCAAGTCAGAGGTGGCGAAACCCGACAG  
GACTATAAAGATAACCAGGCGTTTTCCCCCTGGAAGCTCCCTCGTGCGCTCT  
CCTGTTCCGACCCTGCCGCTTACCGGATACCTGTCCGCTTTCTCCCTTC  
GGAAACGTGGGGCTTTTCAAAGTCCACCTGGAGGGTTTCCAATTCCGG  
GGAAGGCGTTCCCTCAAACCTTGGTTGTGTGGCAAAACCCCGTTAGCCC  
AACGGTTGGCCTTATTCGGGAATATATTCTTGGGTCAACCCCGGAAAAC  
ACATTTTTTCCCTTGGGAGCCCTGGTACAGGATTAAGAAACAGGAATT  
ATGGGGTGTCCCAAATTTTTAATGGGGGTACCCGTCCTCCAAAACAAA  
TTATTTTTTCCCTCTCCCCGCTCCCTCAAAAAAAGATTATTTTTTTAC  
ACCACCCACACCGGGGTTTTTTGTGGTTTTTCAA

>MP9

GTGGTGGAGGGCGCATGCTCCCGGCCGCTGGCGGCCGCGGGAATTCGAT  
TCCGACTCGAGGCAGTGGTGTGGTTCAGAGTGGGGATCCAAGGAGAACTT  
TTGAAGGCCGTCGAGTCACGCTATGAGGTACAAGAGGTTTCAGCCAGTGCT  
GTTAGCCCTCGCTACGTTCTCGCGTAGCGATAAAGCATTAAAGCACTAC  
GCGGGAGCCCAAGACACCTCTACGGTGGTCTAAATAGACGGTGTAGCAC  
AGTAGATCGTCTAAATTATTTACATCTTTACGTTACTATGAACTCTGTC  
TTTTACAATCCGTTTGGTTCGAGGTGCCTACGCTCAACCTCCAATAGCATG  
GAGGCCAAGACGTAGGCGCGCACCTGCGCCTCGACCATCCGGGTTGACTA  
CCCAGATCCAACAGCTCACTAGGGCTGTTGGAGCTTTGGTGTGGACAAT  
GCTACACGTGCGCAGCGCCCGGCTCCTCGCACGGCGCCGAGGAAGCCGAA  
GACTCAAAAACCTAAGCCGAAGAAGCAAAACCAGAAACCACCAAACCC  
CCCTCGAGTCGGAATCACTAGTGAATTCGCGGCCGCTGCAGGTTCGACCA  
TATGGGAGAGCTCCCAACGCGTTGGATGCATAGCTTGAGTATTCTATAGT  
GTCACCTAAATAGCTTGGCGTAATCATGGTCATAGCTGTTTCCTGTGTGA  
AATTGTTATCCGCTCACAATTCACACAACATACGAGCCGGAAGCATAAA  
GTGTAAAGCCTGGGGTGCCTAATGAGTGAGCTAACTCACATTAATTGCGT  
TGCCTCACTGCCCGCTTTCCAGTCGGGAAACCTGTCGTGCCAGCTGCAT  
TAATGTAATCCGCAACGCGCGGGGAGAGGCGGTTTTCGCTATTGGGCGCTC  
TTCGCTTCCCTCGCTCACTGACTCGCTCGCTCGGTCGTTCCGGCTGCGGC  
GAGCGGTATCAGCTCACTCAAAGGCGGTAATACGTTATCCACAGAATCA  
GGGGATAACGCAGGAAAGAACATGTGAGCAAAAGGCCAGCAAAAGGCCAG  
GAACCGTAAAAAGGCCGCGTTGCTGGCGTTTTTCCATAGGCTCCGCCCC  
CTGACGAGCATCACAAAATCGACGCTCAAGTCAGAGGTGGCGAAACCCG  
ACAGGACTATAAAGAAACCAAGGCGTTTTCCCCCTGGAAAGTCCCCCGGG  
GGCTTCCCTGTTCAAACCTGCCGTTACCGGAAAACCTGGTGCCTTTCT  
CCCTTCGGGAGAGGGGGGCGTTTTCTAAACTCACCCCTGAGGGATTCAA  
TTCCGGGGGAGGGGGTTCCTTCAAACCTTGGGGGTGGGGTGAAAACCCCC  
GTCATCCCGAACCGTGGCCTTTACTTGAGAAAATCTCTTTGTGTTACCC  
GGGAGAAAAAATATCCCCCTTGCCAGGCCCGGGCAAGGGTCAGAGAAA  
AAGGGATTTAGGGGGGTGGGAAATTTTTATGTGGGGGTACCCGCTCCTT  
CAACACATTATAATAAACCTCCCTGCACCTCCTTCAAAAAAAGGTTAT  
TGTGGGTTTACAAACCAAAGGGAAAAGGGGGGTTTTGTTCTGGGGGCG  
AAAAAAGAAAAAGGAAAGGCAAAAAAGGGGCGGAAAAA AAAACCCCC  
AAAAAA

>MP11

GGATGGGCGGAGTCGCATGCTCCCGGCCGCCATGGCGGCCGCGGGAATTC  
GATTCCGACTCGAGGTGCGCCTGTGGAAGAAATTGAGTGAGCAAGGGAAG  
AAGCAAATTGCTCCTAAAAATGCTAATAATATGGAAGTGAAGTAGAAACC  
AAAAGGGGAAGCTGCAAAAAGTCCGGTTTTTCGTTTCGATTCTTTGCTGTTCC  
GCAGTAGGCTGCTGAGGGCGGCGGTGCTATCGATCATAATAAATCGCAGC  
AAGCCACCGCAGAGCGTATCATCAAGGTGCTACCTATGCCAGAGCCTACT  
ACTGTACCAGCGAACCCAAAAGGATCCCTTCCAGGAGGAATAAAAAGATA

ACCACCCACACGTTTACCTCGAGTCGGAATCACTAGTGAATTCGCGGCCG  
CCTGCAGGTCGACCATATGGGAGAGCTCCAACGCGTTGGATGCATAGCT  
TGAGTATTCTATAGTGTACCTAAATAGCTTGGCGTAATCATGGTCATAG  
CTGTTTCCTGTGTGAAATTGTTATCCGCTCACAATTCCACACAACATACG  
AGCCGGAAGCATAAAGTGTAAGCCTGGGGTGCCTAATGAGTGAGCTAAC  
TCACATTAATTGCGTTGCGCTCACTGCCCCGCTTTCAGTCGGGAAACCTG  
TCGTGCCAGCTGCATTAATGAATCGGCCAACGCGCGGGGAGAGGCGGTTT  
GCGTATTGGGCGCTCTCCGCTTCTCGCTCACTGACTCGCTGCGCTCGG  
TCGTTCCGGCTGCGGCGAGCGGTATCAGCTCACTCAAAGGCGGTAATACGG  
TTATCCACAGAATCAGGGGATAACGCAGGAAAGAACATGTGAGCAAAGG  
CCAGCAAAGGCCAGGAACCGTAAAAAGGCCGCGTTGCTGGCGTTTTTCC  
ATAGGCTCCGCCCCCTGACGAGCATCACAAAAATCGACGCTCAAGTCAG  
AGGTGCCGAACCCGACAGACTATAAAGATACCAGGCGTTTCCCCCTGG  
AAGCTCCCTCGTGCCTCTCCTGTTCCGACCCTGCCGTTACCGGATACC  
TGTCCGCTTTCTCCCTTCGGGAAGCGTGGCGCTTCTCATAGCTCACGC  
TGTAGGTATCTCAGTTCGGGGGAGGTCGTTCCGCTCCAAGCTGGGCTGTGT  
GGACAAACCCCGTTTAGCCCGACCGGTGGGCCTTATCCGGGAACATTC  
GCCTTGAGTCCAACCCGTAAGACACGACTTATTCGCCCTGGGGACAGCC  
CTTGTTAAAAGGTTAACAAAACCAGGGATGTAGGCGGGGGTCCAAAATTC  
TTTAAAGGGGGCGTACTACCGTACCTTAAAAAAAATTTTGTATTGC  
GCCTCTTGACCCGTACCCTCCGAAAAAATGGAGGCCTGTTCCGAAAA  
CACCAACCAACCCCGCGGGTGTGTTTGTGTGGGTTAACCCCAACAA  
AAGACAAAAGAACAATTTATTTTTCTTTGGGGTCTCTGGAGACACCC  
CCCCGGGGGGCCGGGCGGAAGAAGAGCGACCAGGGGATAAAAAAATTA  
ATAAAATATATAATATTAATAAAAAAAAATAAAAAAAAAGACCAGA  
AAAAAAAACCCACCGCC

>MP13

GGGTGGCCGAGGTCCCATGCTCCCGGCCGATGGCGGCCGCGGGAATTC  
GATTCGACTCGAGGGGCTTCTGTGGTACAAGAGGTTTCAGCCAGTGTGT  
TAGCCCTCGCTACGTTCTCGCGTAGCGATAAAGCATTTAAAGCACTACGC  
GGGAGCCCAAGACACCTCTACGGTGGTCCTAAATAGACGGTGTAGCACAG  
TAGATCGTCTAAATTATTTACATCTTTACGTTACTATGAACTCTGTCTT  
TTACAATCCGTTTGGTTCGAGGTGCCTACGCTCAACCTCCAATAGCATGGA  
GGCCAAGACGTAGGCGTGCACCTGCGCCTCGACCATCCGGGTTGACTACC  
CAGATCCAACAGCTCACTAGGGCTGTTGGAGCTTTGGTGTGCTGGACAATGC  
TACACGTCGCCAGCGCCCGCTCCTCGCACGGCGCCGAGGAAGCCGAAGA  
CTCAAAAACCTAAGCCGAAGAAGCAAACAGAAACCACCACACCTAACCC  
CTCGAGTCGGAATCACTAGTGAATTCGCGGCCGCTGCAGGTCGACCATA  
TGGGAGAGCTCCAACGCGTTGGATGCATAGCTTGAGTATTCTATAGTGT  
CACCTAAATAGCTTGGCGTAATCATGGTCATAGCTGTTTCCTGTGTGAAA  
TTGTTATCCGCTCACAATTCCACACAACATACGAGCCGGAAGCATAAAGT  
GTAAAGCCTGGGGTGCCTAATGAGTGAGCTAACTCACATTAATTGCGTTG  
CGCTCACTGCCCCGCTTTCAGTCGGGAAACCTGTCGTGCCAGCTGCATTA  
ATGAATCGGCCAACGCGCGGGGAGAGGCGGTTTTCGTATTGGGCGCTCTT  
CCGCTTCCCTCGCTCACTGACTCGCTGCGCTCGGTCGTTCCGGCTGCGGCGA  
GCGGTATCAGCTCACTCAAAGGCGGTAATACGGTTATCCACAGAATCAGG  
GGATAACGCAGGAAAGAACATGTGAGCAAAGGCCAGCAAAGGCCAGGA  
ACCGTAAAAGGCCGCGTTGCTGGGGGTTTTTCCATAGGCTCCGCCCCC  
TGACGAGCATCACAAAATCGACGCTCAAGTCAGAGGTGGCGAAACCCGA  
CAGGACTATAAAGATACCAAGGCGTTTCCCCCTGGGAAGCTTCCCTCGGG  
CGCTCTCCCTGTTCCGACCTGGCCGCTTACCGGGAAACCTGGTCCGCCT  
TTTTCCCTTCGGGGAAACGGGGGGCCTTTTCCCA

>MP15

GGATAGCGACGTCGCATGCTCCCGGCCGCTGGCGGCCGCGGGAATTCGA  
TTCCGACTCGAGGTTAGACTGTGGCGCAATCTGTTGACAGTTCGACGTAT  
GCTTCGCTAAGCTGACTGTTTTTCGGAGTCGAAAAACCTATCCATAGGGA  
CCTCCTGTAGCGGGACAGTCGATGTGTCTTTCGGAATAGTGCTGCAGCC  
TTCGGTCTTTTAAATCGGGCCACGTATGAGGTGACACACTCTGTTGTTAT



TCTTATTGGTTTCTCTTTAAATTCTTCCCAGTAGTCTGTATTACATGCAT  
ACTTTTTAAAGCACTCCACACGCTTACCTCGAGTCGGAACTACTAGTGAA  
TTCGCGGCCCGCTGCAGGTCGACCATATGGGAGAGCTCCCAACGCGTTG  
ATGCATAGCTTGAGTATTCTATAGTGTCACCTAAATAGCTTGGCGTAATC  
ATGGTCATAGCTGTTTCTGTGTGAAATTGTTATCCGCTCACAAATCCAC  
ACAACATACGAGCCGGAAGCATAAAGTGTAAGCCTGGGGTGCCTAATGA  
GTGAGCTAACTACATTAATTGCGTTGCGCTCACTGCCCCGTTTCCAGTC  
GGAAACCTGTGCTGCCAGCTGCATTAATGAATCGGCCAACGCGCGGGGA  
GAGGCGGTTTGCATTTGGGCGCTCTCCGCTTCCGCTCACTGACTCG  
CTGCGCTCGGTCGTTCCGCTGCGGCGAGCGGTATCAGCTCACTCAAAGGC  
GGTAATACGGTTATCCACAGAATCAGGGGATAACGCAGGAAAGAACATGT  
GAGCAAAAGGCCAGCAAAAGGCCAGGAACCGTAAAAAGGCCGCGTTGCTG  
GCGTTTTTCCATAGGCTCCGCCCTGACGAGCATCACAAAAATCGACG  
CTCAAGTCAGAGGTGGCGAAACCCGACAGGACTATAAAGATAACCAGGCGT  
TTCCCCCTGGAAGCTCCCTCGTGCCTCTCCTGTTCCGACCCTGCCGCTT  
ACCGGATACCTGTCCGCCTTCTCCCTTCGGGAAGCGTGGCGCTTTCTCA  
TAGCTCACGCTGTAGGTATCTCAGTTCGGTGTAGGTGCTTCGCTCCAAGC  
TGGGCTGTGTGCACGAACCCCCCGTTCAGCCCGACCGCTGCGCCTTATCC  
GGAACTATCGTCTTGAGTCCAACCCGGTAAGACACGACTTATCCCCACT  
GGGGGCAGCCACTGGGAACAGGATTACCAAAACAAGGTATTAACGGGGC  
GTCCAAAGTTCTTTAAAGGGGGGCCTACACCCCGCTCCCTTAAAAAACCA  
AATTTTGGACCTCGGCTTTGTTGAACCCGTTACCTCCCGGAAAAAGATAG  
GGGGTCTTTCCCGCGAAAAACAACCCACGGACACGGGGGTTTTTTGTGT  
TGACACCGAAAAAACCAACAACAAGAAAAAATAAATTTTTTCTC  
TGGGTGGGCGGCGGGCGAACAACAAGAAATAGGTGGTTTTTAAGAG  
ATTTAACCTTTGTTTTCCCAAAATAAATAAATAAATAAATAAATAA  
AAAATAAATAAATAAATAAATAAAGAAAGAAAAAGACCCAAACCCCCCCC  
CCCCGCGGCCCCCCCCCCCCCCCCCCCCCTCTTTCCCCCCCCCCCC  
CTCCCGGCCCCCCGCCCCCAAGGTCCAAGGGAAAAAAGAAAGA  
AACCACATTTAAGGAAATCTAGGGGAACAACGGGGGAAAAAATAATG  
TTGGACGCTAACACGGGAATTTACGAAAAAATGTGGAAGTTTCGGCGTA  
AAAAACCGGCCCCCC

>MP17\_consensus (Assembled with: [http://www.hpa-bioinformatics.org.uk/cgi-bin/assembly\\_tool/seq\\_assemble.cgi?no=2](http://www.hpa-bioinformatics.org.uk/cgi-bin/assembly_tool/seq_assemble.cgi?no=2))

atggctgacctgcagcggcgcgaattcactagtattccgactcgaggtgaaggtgtggtgtttctggtttgcttcTTCGGCTTAGGTTT  
TTGAGTCTTCGGCTTCCCTCGGCGCCGTGCGAGGAGCCGGGCGCTGGCGACGTGTAGCATTGT  
CCAGCACCAAAGCTCCAACAGCCCTAGTGAGCTGTTGGATCTGGGTAGTCAACCCGGATGGC  
CGAGGCGCAGGTGCACGCCTACGTCTTGGCCTCCATGCTATTGGAGGTTGAGCGTAGGCACC  
TCGACCAAACGGATTGTA AAAAGACAGAGTTCATAGTAACGTA AAGATGTGAAATAATTTAG  
ACGATCTACTGTGCTACACCGTCTATTTAGGACCACCGTAGAGGTGTCTTGGGCTCCCGCGT  
AGTGCTTTAAATGCTTTATCGCTACGCGAGAACGTAGCGAGGGCTAACAGCACTGGCTGAAC  
CTCTTGTACCTCATAGCGTGACTCGACGGCCTTCAAAGTTCTCCTTGGATCCCCACTCTGAA  
CCACGCCCTTGTCTCATCTTCCAGCGCTCTACGCCTGTCGTGATCCTGCTCATCTACTGG  
TAGAGGCTTGCCTAGTTTGAACAGTCTCTTAAGCGGATCAGAGACCCGGCAGCTGTGTGCG  
TCACTTGGTCTTCTAGAATAAATCCGCCGCAAAAGTAAGGGGCCTTGATACCAATGACCGTG  
TCTATGATTTTCACTTCCATATTCATCCAAGTGGCGCATCTGTGCGCCATTATCTTGTCCGAA  
ACGACACCATGTATAATGTTGTCGTCCCCTATGAAAGCTGCGCATTTGGAGTCCCTCAACCG  
TTGTTCTAGAACTCGGCTAGCAATAACTACATTCAACACAGTGTTAACAAACAGTGTTAAAA  
ACATTCGGACTTCATCATAGCACCAAATTTAAACCTGGTTGCTGTCGGTAGGTGGACGCTT  
GTGATCTCCCCGAAGGCACATTCAATGAGGTCCATCAGGCGGTCATCCACTCCTAAGTCTTC  
CAGAATCATCAGTGCAGTCAGGGCTAATGAATCATCCTGGCTCTTGTGCGAAAGACGCTATAT  
CTGTTTCTAGCACCGGGTCACCGTAAGAAAAATTTGCTGCTATGATCGCGTCGAAATCCTCG  
GCAGACATGTCGAATAGTGTATGGATGTTAGGTAACAGTACTGCTGTAAGCCTCCGTA TAG  
CTCCCGGTGTATACCGCACAAAGTAAGCCGTGGCCAGTGGTTCTGCTGCTTGAATAACTTGTA  
CCTTGGGACGCTCTTCGGTATGTTTAGTGCCGGGTGTACCTTTACATCTCTTTTCATGTCCAT  
TACAAACCTATCCATAGGGACCTCCTGTAGCGGGACCAGTCGATGTGTCTTTGCGAATAGTG  
CTGCAGCCTTCGGTCTTTAATCGGGCCACGTATGAGGTGACACACTCTGTTGTTATTCTTA

TTGGTTTCTCTTTAAATTCTTCCcagtagtctgtattacatgcatacttttaagcactccacaccactacctcgagtcggaatcgaatt  
cccgcggccgcc

>MP19

GGATGGCCGACTTCGCATGCTCCCGGCCGCCATGGCGGCCGCGGGAATTC  
GATTCCGACTCGAGGGGCTTCTGTGGTACAAGAGGTTTCAGCCAGTGCTGT  
TAGCCCTCGCTACGTTCTCGCGTAGCGATAAAGCATTAAAGCACTACGC  
GGGAGCCCAAGACACCTCTACGGTGGTCTAAATAGACGGTGTAGCACAG  
TAGATCGTCTAAATTATTCACATCTTACGTTACTATGAACTCTGTCTT  
TTACAATCCGTTTGGTCGAGGTGCCTACGCTCAACCTCCAATAGCATGGA  
GGCCAAGACGTAGGCGTGCACCTGCGCCTCGACCATCCGGGTTGACTACC  
CAGATCCAACAGCTCACTAGGGCTGTTGGAGCTTTGGTGCTGGACAATGC  
TACACGTCGCCAGCGCCCGGCTCCTCGCACGGCGCCGAGGAAGCCGAAGA  
CTCAAAAACCTAAGCCGAAGAAGCAAACCAGAAACCACCACACCTAACCC  
CTCGAGTCGGAACTACTAGTGAATTCGCGGCCGCTGCAGTCGACCATAT  
GGGAGAGCTCCCAACGCGTTGGATGCATAGCTTGAGTATTCTATAGTGTC  
ACCTAAATAGCTTGGCGTAATCATGGTCATAGCTGTTTCTGTGTGAAAT  
TGTTATCCGCTCACAATTCCACACAACATACGAGCCGGAAGCATAAAGTG  
GTAAGCCTGGGGTGCCTAATGAGTGAGCTTACTCACATTAATTGCGTTGC  
GCTCACTGCCCCGCTTCCAGTCGGGAAACCTGTCGTGCCAGCTGCATTA  
TGAATCGGCCACGCGCGGGGAGAGGGCGGTTGCGTATTGGGCGCTCTTC  
CGCTTTCCTCGCTCCTGACTCGCTGCGCTCGGTGCTCGGCTGCGGCAAGC  
GGATCAGCTCACTCAAGGCGGTATACGGTATCCAGAATCGGGGAAACGC  
AGGAAAACAGGGAGCAAAGGCAGCAAAGGCCG

>MP21

AAGACGGCGTACGCGCATGCTCCCGGCCGCCATGGCGGCCGCGGGAATTC  
GATTCCGACTCGAGGTAGCGCTGTGGGATGATGCCGATGACGGAGTTCTC  
CGTATACAAGTAAGTGCCAGTTAGGGTACAACAGGGCGGGCACTGCAGC  
TAGCGCCGACTCCGTTTCATGGGCGGAGGAGTGCCTCCGAAATCCAGG  
AGGGAGCAATTGCAGATTTTAAGGTCTTACGCTCTAAACCATGTTTACAC  
CTATACATAAAGGATACTTTGTCATTGTCAAGTGCCCTCCTGGTGATAG  
TATTACAACATCATTGAAAGTACATGGCTCGGATCAAACCTGCACAATTC  
CAATGCGAGTAGGTTACAAGTTCGTAGGCAAGGAAAAATATACTCTGCCA  
CCAATGCATGGGACACAAATACCTTGCCCTTACCTACGAAAGGACACCAGA  
GAAAAGTGCAGGATACGTGACCATGCATCGTCCCGGACAACAATCCATAA  
CCATGCTGATGGAAGAGAGCGGAGGGGAGGTGTACGTACAACCGACCAGT  
GGGCGAAACGTCACCTACGAGTGTAATGCGGAGACTTTAAACTGGGAC  
TGTCACTGCGCGCACTAAGATAGACGGCTGTACAGAAAGGAAACAATGCA  
TTGCGTATTTCCGCCACCACGTCAAATGGGTGTTTAACTCCCCTGACTTG  
ATCAGGCATACCGACCACACAGCATCCTCGAGTCGGAACTACTAGTGAAT  
TCGCGGCCGCTGCAGGTCGACCATATGGGAGAGCTCCCAACGCGTTGGA  
TGCATAGCTTGAGTATTCTATAGTGTCACCTAAATAGCTTGGCGTAATCA  
TGGTCATAGCTGTTTCTGTGTGAAATTGTTATCCGCTCACAATTCCACA  
CAACATACGAGCCGGAAGCATAAAGTGTAAGCCTGGGGTGCCTAATGAG  
TGAGCTAACTCACATTAATTGCGTTGCGCTCACTGCCCGCTTCCAGTCG  
GGAAACCTGTCGTGCCAGCTGCATTAATGAATCGGCCAACGCCCGGGAA  
AGGCGGTTTGCATATTGGGCGCTTCCCGCTTCTCGCTCACTGACTCGC  
TGCCTCGGTCGTTCCGGTGCGGCGAGCGGTATCAGTCACTCAAAGGCG  
GGAATACGGTTATCCCAGAATCAGGGGATAAAG

>MP23

GGCTGGCGAGGTGCATGGCTCCCGGCCGCTGGCGGCCGCGGGAATTCGAT  
TCCGACTCGAGGGGCTTCTGTGGTACAAGAGGTTTCAGCCAGTGCTGTTAG  
CCCTCGCTACGTTCTCGCGTAGCGATAAAGCATTAAAGCACTACGCGGG  
AGCCCAAGACACCTCTACGGTGGTCTAAATAGACGGTGTAGCACAGTAG  
ATCGTCTAAATTATTTACATCTTACGTTACTATGAACTCTGTCTTTTA  
CAATCCGTTTGGTCGAGGTGCCTACGCTCAACCTCCAATAGCATGGAGGC  
CAAGACGTAGGCGTGCACCTGCGCCTCGACCATCCGGGTTGACTACCCAG  
ATCCAACAGCTCACTAGGGCTGTTGGAGCTTTGGTGCTGGACAATGCTAC  
ACGTCGCCAGCGCCCGGCTCCTCGCACGGCGCCGAGGAAGCCGAAGACTC

AAAAACCTAAGCCGAAGAAGCAAAACCAGAAACCACCACACCTAACCCCTC  
GAGTCGGAATCACTAGTGAATTCGCGGCCGCCTGCAGGTGACCATATGG  
GAGAGCTCCCAACGCGTTGGATGCATAGCTTGAGTATTCTATAGTGTCAC  
CTAAATAGCTTGGCGTAATCATGGTCATAGCTGTTTCCTGTGTGAAATTG  
TTATCCGCTCACAATCCACACAACATACGAGCCGGAAGCATAAAGTGTA  
AAGCCTGGGGTGCCTAATGAGTGAGCTAACTCACATTAATTGCGTTGCGC  
TACTGCCCGCTTCCAGTCGGGAAACCTGTCGTGCCAGCTGCATTAATG  
AATCGGCCAACGCGCGGGGAGAGGGCGGTTTGCATTTGGGCGCTCTTCCG  
CTTCCTCGCTCACTGACTCGCTGCGCTCGGTTCGTTTCGGCTGCGGCGAGCG  
GTATCAGCTCACTCAAAGGCGGTAATACGGTTATCCACAGAATCAGGGGA  
TAACGCAGGAAAGAACATGTGAGCAAAAGGCCAGCAAAAGGCCAGGAACC  
GTAAAAAGGCCGCTTGTGGCGTTTTCCATAGGCTCCGCCCCCTGACG  
AGCATCACAAAAATCGACGCTCAAGTCAGAGGTGGCGAAACCCGACAGGA  
CTTTAAAGATAACGAGCGTTTTCCCCCTGGAAAGTCCCTCGTGGGGTCTCC  
TGTTTCGACCTGCCGCTTACCGGATACTGGCCGCCTTTTTCCCTTCGGG  
AGAGGGGGGGCTTTCTCTAACTCACCCCGAGGGATTCAAATTCGGGGGA  
AGGGGGTTCGTTCCAACCTGGGGTTGTGTGCAGAACCCCGTCAACCCG  
AACGCGGCGCCTTATCTGGAAATATAACTATGGTGCACCCGGGAGACAGA  
CATATCCCTTGGCGCGCCCCGGGAAAGATAAAAAAAAAAAGATAAAGG  
GGGGGGAAAGTTTTTAATGGGGGTTACCCGGCCTCAAAAAATATTTTT  
TATGTCTTGGGAGGTTTCTCCAAAAAGAGTTTGGCGAAAAACAAAAAG  
GGGGTGTGTGTTGGTTGTAAGAAAAAAGAAGAGAATTTATTTTTGGG  
GAAAAAAAAAAAA

>MP25

GACTGGCCAACCTCCATGCTCCCGGCCGCTGGCGGCCGCGGGAATTCGA  
TTCCGACTCGAGGATGAGTTGTGGGATGATGCCGATGACGGAGTTCTCCG  
TATACAAGTAAGTGCCAGTTAGGGTACAACAGGGCGGGCACTGCAGCTA  
GCGCCCGACTCCGGTTCATGGGCGGAGGAGTGCCTCCGGAATCCAGGAG  
GGAGCAATTGCAGATTTTAAGGTCTTCACGTCTAAACCATGTTTACACCT  
ATCACATAAAGGATACTTTGTCAATTGTCAAGTGCCTCCTGGTGATAGTA  
TTACAACATCATTGAAAGTACATGGCTCGGATCAAACCTGCACAATTCCA  
ATGCGAGTAGGTTACAAGTTCGTAGGCAAGGAAAAATATACTCTGCCACC  
AAAGTCAGGACACAAATACCTTGCCTTACCTACGAAAGGACACCAGAGA  
AAAGTCAGGATACGTGACCATGCATCGTCCCGGACAACAATCCATAACC  
ATGCTGATGGAAGAGAGCGGAGGGAGGTGTACGTACAACCGACCAGTGG  
GCGAAACGTACCTACGAGTGTAATGCGGAGACTTTAAAACCTGGGACTG  
TCACTGCGCGCACTAAGATAGACGGCTGTACAGAAAGGAAACAATGCATT  
GCGTATTTTCGCCGACCACGTCAAATGGGTGTTTAACTCCCCTGACTTGAT  
CAGGCATACCGACCACACAATCACTAGTGAATTCGCGGCCGCCTGCAGGT  
CGACCATATGGGAGAGCTCCCAACGCGTTGGATGCATAGCTTGAGTATTC  
TATAGTGTACCTAAATAGCTTGGCGTAATCATGGTCATAGCTGTTTCCT  
GTGTGAAATTGTTATCCGCTCACAATTCCACACAACATACGAGCCGGAAG  
CATAAAGTGTAAGCCTGGGGTGCCTAATGAGTGAGCTAACTCACATTA  
TTGCGTTGCGCTCACTGCCCGCTTCCAGTCGGGAAACCTGTCGTGCCAG  
CTGCATTAATGAATCGGCCAACGCGCGGGGAGAGGCGGTTTGCATTTGG  
GCGCTCTTCGCTTCCCTCGCTCACTGACTCGCTGCGCTCGGTTCGTCG  
TGCGGCGAGCGGGATCAGCTCACTCAAAGGCGGGAATACGGGTATCCACA  
GAATCAGGGGATAACCCAGGAAAGAACATGTGAGCAAAAGGCCCGCAAAA  
GGCCCGGAACCGTAAAAAGGCCCGTTGCTTGGGGTTTTTTCCTAAGGGCCC  
GCCCCCTGACAAGAATCAAAAATCAACCCTCAAGCAAAAGTGGGGAAA  
CCCCCGGGATTAAAAATACAAGGGGTTCCCCTGGAAGTCCCCTGGGCGT  
CCTTGTGCAACTGCGCGTACGAGAACATGCCCTTTCCCTTTCGGGAGGG  
GGGTTCCATATCCCCCGGGGGGTACAACCTTGGGGAGGGGGGTCCCCAC  
GGGGTGGTGGGAACCCCGCCCCCACCAGCCCTCCCGCAACTTTTTTTCC  
CTAGCGCTTTCTTTTCCCCCGGGCCCCCGGGCCGGGGAGGAGGGGGG  
GAGGGGGGGGGGGGGGGGGGGGGGGGGGGGGGGGGGGGGGGTGTATTTTTT  
TTTTTTTTTTTTTGAACCCCCCCCCCCCCCCCCCCCTCTCCCGGTT  
CAGGGGTCAAGGGCCCCGCAGAGTCGCAATTTATTTTTTAATCGCTTAA  
CATTTTTTAATTTTCACCAAAAAATGAAGAATTTTTGAATTTAAAAAT

AAGAAAAACAAAACCTTTAAAACCCGCTTTTCCCCGCCAAAGGCCG

>MP27

GGGTAGGCGAACGTTCGCATGGCTCCCGGCCGCGCATGGCGGCCGCGGGAAT  
TCGATTCCGACTCGAGGCGCATGTGTGGTACAACAGGTTTCAGCCAGTGCT  
GTTAGCCCTCGCTACGTTCTCGCGTAGCGATAAAGCATTAAAGCACTAC  
GCGGGAGCCCAAGACACCTCTACGGTGGTCCTAAATAGACGGTGTAGCAC  
AGTAGATCGTCTAAATTATTTACATCTTTACGTTACTATGAACTCTGTC  
TTTTACAATCCGTTTGGTTCGAGGTGCCTACGCTCAACCTCCAATAGCATG  
GAGGCCAAGACGTAGGCGTGCACCTGCGCCTCGACCATCCGGGTTGACTA  
CCCAGATCCAACAGCTCACTAGGGCTGTTGGAGCTTTGGTGTGGACAAT  
GCTACACGTCGCGAGCCCGGCTCCTCGCACGGCGCCGAGGAAGCCGAA  
GACTCAAAAACCTAAGCCGAAGAAGCCAAACCGGAAACCACCAATCAG  
TCCTCGAGTCGGAATCACTAGTGAATTCGCGGCCGCTGCAGGTCGACCA  
TATGGGAGAGCTCCCAACGCGTTGGATGCATAGCTTGAGTATTCTATAGT  
GTCACCTAAATAGCTTGGCGTAATCATGGTCATAGCTGTTTCCTGTGTGA  
AATTGTTATCCGCTCACAATTCACACAACATACGAGCCGGAAGCATAAA  
GTGTAAAGCCTGGGGTGCCTAATGAGTGAGCTAACTCACATTAATTGCGT  
TGCGCTCACTGCCCCGTTTCCAGTCGGGAAACCTGTCGTGCCAGCTGCAT  
TAATGAATCGGCCAACGCGCGGGGAGAGGCGGTTTTCGTATTGGGCGCTC  
TTCCGTTTCTCGCTCACTGACTCGCTGCGCTCGGTCGTTTCGGCTGCGGC  
GAGCGGTATCAGCTCACTCAAAGGCGGTAATACGGTTATCCACAGAATCA  
GGGGATAACGCAGGAAAGAACATGTGAGCAAAAGGCCAGCAAAAGGCCAG  
GAACCGTAAAAAGGCCGCGTTGCTGGCGTTTTTCCATAGGCTCCGCCCC  
CTGACGAGCATCACAAAATCGACGCTCAAGTCAGAGGTGGCGAAACCCG  
ACAGGACTATAAAGATACCAAGGCGTTTCCCCCTGGAACTCCCTCGTGC  
GCTCTCTGTTCCGACCCTGCCGCTTACCGGATACTTGTCCGCCTTTCTC  
CCTTCTGGGAGACGGGGGGGCTTTTCCCTAGCTCACGCCTGGAGGGATCCCA  
ATCCGGGGGAGGGGGGTTCCCTCCAAACTTGGGGGTGTGGGGCAAAAAC  
CCCCGTTTAAAGCCGAACGGTGGGCCTTTTTCTGGGAATATATTTTTTTG  
GGGTCAACCCCGGAAAGACAGATTATTTTCTTTGGGGGGCGGCCCGG  
CAAGGGAAATAAAAAAGAAGAAAATAAAAGGGGGGGTGCAGGGTTCTT  
TTAAGGGGGGGGCCACCCCGCCCCCCTAAAAAACAATAAAAAAATA  
TGTTTCTTGGGGGGGCTCCCTCCCGCAAAGAAGGGGGTTTTTTCGGGG  
AAAAACCCCCCCCCACGGGGCGGGTGTGTGTGGTGGGGTTTTTAAAAAAA  
AAAAAAAAGAAAAAAGTAAAAAATTGGGGGGGGCCGCGGGGAGGGCG

>MP31

GGATGGCGAGGTCCCATGGCTCCGGCCGCGCATGGCGGCCGCGGGAATTCG  
ATCCGACTCGAGGATGAGGTGTGGTGGTTTCCGGTTTTGCTTCTTCGGC  
TTAGGTTTTTGGAGTCTTCGGCTTCCCTCGGCGCCGTGCGAGGAGCCGGGCG  
CTGGCGACGTGTAGCATTGTCCAGCACAAAGCTCCAACAGCCCTAGTGA  
GCTGTTGGATCTGGGTAGTCAACCCGGATGGTTCGAGGCGCAGGTGCACGC  
CTACGTCTTGGCCTCCATGCTATTGGAGGTTGAGCGTAGGCACCTCGACC  
AAACGGATTGTAAGACAGAGTTCATAGTAACGTAAAGATGTGAAATAA  
TTTAGACGATCTACTGTGCTACACCGTCTATTTAGGACCACCGTAGAGGT  
GTCTTGGGCTCCCGGTAGTGCTTTAAATGCTTTATCGCTACGCGAGAAC  
GTAGCGAGGGCTAACAGCACTGGCTGAACCTCTTGTACCACACCTTACC  
TCGAGTCGGAATCACTAGTGAATTCGCGGCCGCTGCAGGTCGACCATAT  
GGGAGAGCTCCCAACGCGTTGGATGCATAGCTTGAGTATTCTATAGTGC  
ACCTAAATAGCTTGGCGTAATCATGGTCATAGCTGTTTCCTGTGTGAAAT  
TGTTATCCGCTCACAATTCACACAACATACGAGCCGGAAGCATAAAGTG  
TAAAGCCTGGGGTGCCTAATGAGTGAGCTAACTCACATTAATTGCGTTGC  
GCTCACTGCCCCGTTTCCAGTCGGGAAACCTGTCGTGCCAGCTGCATTAA  
TGAATCGGCCAACGCGCGGGGAGAGGCGGTTTTCGTATTGGGCGCTCTTC  
CGTTTCTCGCTCACTGACTCGCTGCGCTCGGTCGTTTCGGCTGCGGCGAG  
CGGTATCAGTCACTCAAAGGCGGTAATACGGTTATCCACAGAATCAGGG  
GATAACGCAGGAAAGAACATGTGAGCAAAAGGCCAGCAAAAGGCCAGGAA  
CCGTAAAAAGGCCGCGTTGCTGGCGTTTTTCCATAGGCTCCGCCCCCTG  
ACGAGCATCACAAAATCGACGCTCAAGTCAGAGGTGGCGAAACCCGACA

GGACTATAAAGATACCAGGCGTTTCCCCCTGGAAGCTCCCTCGTGGGCTC  
TCCTGTTCCGACCCTGCCGCTTACCGGATACCTGTCCGCTTCTCCCTTC  
GGGAAAGTGGGGCTTTTCCAAAGTCACCCCGGAGGGATTCCAATTCGGG  
GGAAGGGGTTCCCTCCAAGTGGGGTTGGGTGCGAAACCCCCCGTCACCC  
AACGGTTGGCCTTATCTGGGAAATTATGCTTTTAGTCCACCCCGGGAAGA  
ACAATTATTTCCCTTTGGGGGGGCCCCCTGGGAAAGGGAAAAAAAAAAGAG  
GGGTTAGGGGGGGGGGCGATTTTTTTATATGGGGGGGGCCCCCGCCCC  
AAAAAAAAAATAAATTTTTTCTTTGTGGGCGCCCTCTCCAAAAAAAAAAGG  
GTTTGGTGTAAAAACAACAACCCGC

>MP33

GGGGGAGCGAGTCGCTGCTCCGGCCGCCTGGCGGCCGCGGGAATTCGATT  
CCGACTCGAGGTGCCCGTGTGGCAAAGATAGTGAACGAGAAAGGCATCTC  
CTCGGTAGCTATACCGCTGCTCTCAACAAGTATCTATGCTGCCGGAGCTG  
ATCGCCTGGATTTCTCGCTGAGATGTCTTTTTACCGCGCTGGATCGTACG  
GATGCGGATGTCACAATATATTGCCTAGATAAGAAGTGGGAGCAACGCAT  
AGCAGATGCTATTAGGATGCGGAAACACGTAAGTGAATTAAGATCCGG  
ACATAGAGATAGATGAAGGATTAACCCGGGTACACCCAGATAGCTGCCTC  
AAGGATCACATAGGCTACAGTACCAGTATGGGGAAATTGTACTCATACTT  
TGAAGGTACTAAATTCACCGAACCGCAAAGACATAGCCGAGATTCGTG  
CGCTGTTTCTGATGTACAAGCCGCTAACGAACAAATCTGCCTGTACT  
TTAGGCGAACCGATGGAGTCCATACGCGAAAAGTGCCAGTCGAAGACTC  
CCCGGCATCAGCACCTCCTAAGACAATACCTTGCTATGTATGTATGCTA  
TGACAGCCGAACGTATTTGCCGCTACGCAGTAACTCCGTAACGAACATA  
ACGGTGTGCTCATCCTTTCCGTTACCCAAGTACCGAATAAAGAACGTACA  
AAAGGTACAGTGCACGAAAGTTGTGCTATTTAACCCGGATGTACCGCCCT  
ACATTCGCCGAGAGTATACATTAACAAGGGACGAGCCCTCCTGTTACTC  
CCCCACACCACGGGCCTCCAAGTCGGGAATCACCTAGGGGAAATTCGGG  
GCCGCCTTGCAGGGTCGACCCATATGGGGAGAAGCTCCCCAACCGCGTTG  
GAATGCATAACCTTGGAGAATTCCTATAAGGGGGCCCCCTAAAAAGCTTG  
GGCGGAAATCCTGGGGCCAAAAGCGTGTTCGGGGGGGGGAAAATTGGTT  
ATCCCGCTCCAAAATTTCCACCAAAAAAAAAACGAAGCCCGGAAAGCAT  
AAAAAGGTGAAAAACCCCGGGGGGGGGCCCAAAAAGAGAGGGAGCCAAAA  
CCCCCAAATTAATTTGGGGGGTGGGGCCCTCCATTGGCCCCGGCTTTTT  
CCAAGTGGGGGGGAAAAACCTTGTGTTGTGGGCCCCCGGGCTTTATTA  
TAAGGAAAACCGGGCCAAACCCCCCGGGGGGAAAAAAGGGGGGGG  
TTTTTTTGCCTTTT

>MP35

GGGAGGGCAAGGCGCATGCTCTCGGCCGCCTGGCGGCCGCGGGAATTCGA  
TTCCGACTCGAGGAAGCAGTGTGGTTTACAGAGTGGGGATCCAAGGAGA  
TTTGAAGGCCGTCGAGTCACGCTATGAGGTACAAGAGGTTTACAGCCAGTGC  
TGTTAGCCCTCGCTACGTTCTCGCGTAGCGATAAAGCATTAAAGCACTA  
CGCGGGAGCCCAAGACACCTCTACGGTGGTCTAAATAGACGGTGTAGCA  
CAGTAGATCGTCTAAATTTTACATCTTTACGTTACTATGAACTCTGT  
CTTTTACAATCCGTTTGGTTCGAGGTGCCTACGCTCAACCTCCAATAGCAT  
GGAGGCCAAGACGTAGGCGTGCACCTGCGCCTCGACCATCCGGGTTGACT  
ACCCAGATCCAACAGCTCACTAGGGCTGTTGGAGCTTTGGTGTGCTGGACAA  
TGCTACACGTCGCCAGCGCCCGGCTCCTCGCACGGCGCCGAGGAAGCCGA  
AGACTCAAAAACCTAAGCCGAAGAAGCAAAAACCAGAAACCACCAACTC  
CCCCTCGAGTCGGAATCACTAGTGAATTCGCGGCCGCCTGCAGGTCGACC  
ATATGGGAGAGCTCCCAACGCGTTGGATGCATAGCTTGAGTATTCTATAG  
TGTCACCTAAATAGCTTGGCGTAATCATGGTCATAGCTGTTTCCTGTGTG  
AAATTGTTATCCGCTCACAATTCCACACAACATACGAGCCGGAAGCATAA  
AGTGTAAGCCTGGGGTGCCTAATGAGTGAGCTAACTCACATTAATTGCG  
TTGCGCTCACTGCCCCGCTTCCAGTCGGGAAACCTGTCGTGCCAGCTGCA  
TTAATGAATCGGCCAACGCGCGGGGAGAGGCGGTTTGCATTTGGGCGCT  
CTTCCGCTTCTCGCTCACTGACTCGCTGCGCTCGGTCGTTCCGGCTGCGG  
CGAGCGGTATCAGCTCACTCAAAGGCGGTAATACGGTTATCCACAGAATC  
AGGGGATAACGCAGGAAAGAACATGTGAGCAAAAGGCCAGCAAAAGGCCA

GGAACCGTAAAAAGGCCGCGTTGCTGGCGTTTTTCCATAGGCTCCGCCCC  
CCTGACGAGCATCACAAAAATCGACGCTCAAGTCAAAGGTGGCGAAACC  
CGACAGGACTATAAAGAAACCAAGCGTTTCCCCCTGGAAGCTCCCTCGGG  
GGGTCTCCTGGTCCAACCCTGCGGGTTACGGGAAACTGTGCGGCTTTCTC  
CCCTTCGGGAGAGGGGGGGCGTTTTCTAAACTCCCCCTGAGGGAATCAC  
AAACCCGGGGGAGGGGGTCCCTCCAACCGGGGCGGTGGTGGGAACACCCC  
CGTAACCCAGACGGGCGCGCTTTCCTGGGAATAATTTTT

>MP37

GGACAGGCTAGGTCGCATGGCCTCCGGCCCATGGCGGCCGCGGGAATT  
CGATTCCGACTCGAGGGGGCACTGTGGTACAAGAGGTTCAAGCCAGTGCTG  
TTAGCCCTCGCTACGTTCTCGCGTACGATAAAGCATTAAAGCACTACG  
CGGGAGCCCAAGACACCTCTACGGTGGTCCTAAATAGACGGTGTAGCACA  
GTAGATCGTCTAAATTATTTACATCTTTACGTTACTATGAACTCTGTCT  
TTTACAATCCGTTTGGTTCGAGGTGCCTACGCTCAACCTCCAATAGCATGG  
AGGCCAAGACGTAGGCGTGCACCTGCGCCTCGACCATCCGGGTTGACTAC  
CCAGATCCAACAGCTCACTAGGGCTGTTGGAGCTTTGGTGCTGGACAATG  
CTACACGTCGCCAGCGCCCGGCTCCTCGCACGGCGCCGAGGAAGCCGAAG  
ACTCAAAAACCTAAGCCGAAGAAGCAAAACCGGAAACCACCACATCCGCC  
CCTCGAGTCGGAATCACTAGTGAATTCGCGGCCGCCTGCAGGTCGACCAT  
ATGGGAGAGCTCCCAACGCGTTGGATGCATAGCTTGAGTATTCTATAGTG  
TCACCTAAATAGCTTGGCGTAATCATGGTCATAGCTGTTTCCTGTGTGAA  
ATTGTTATCCGCTCACAAATCCACACAACATACGAGCCGGAAGCATAAAG  
TGTAAGCCTGGGGTGCCTAATGAGTGAGCTAACTCACATTAATTGCGTT  
GCGCTCACTGCCCGCTTTCAGTCGGGAAACCTGTCGTGCCAGCTGCATT  
AATGAATCGGCCAACGCGCGGGGAGAGGCGTTTTGCGTATTGGGCGCTCT  
TCCGCTTCTCGCTCACTGACTCGCTGCGCTCGGTCGTTCCGGCTGCGGGC  
AGCGGTATCAGCTCACTCAAAGGCGGTAATACGGTTATCCACAGAATCAG  
GGGATAACGCAGGAAAGAACATGTGAGCAAAAGGCCAGCAAAAGGCCAGG  
AACCGTAAAAAGGCCGCGTTGCTGGCGTTTTTTCCTTAGGCTCCGCCCCC  
TGACGAGCATCACAAAAATCGACGCTCAAGTCAGAGGTGGCGAAACCCGA  
CAGGACTTTAAAGATACCAGGCGTTTCCCCCTGGAAGCTCCCTCCGGGGG  
CTTCCTTGTTCCGACCCTGCCGTTACCGGAAACCTGGCCGCCTTTCTCC  
CCTTCGGAAACGGGGGGCTTCCCAAAGCTAACCTGGAGGATTCCAATT  
CCGGGTGAGGGCGTTCGCTCCCAACTGGGGGTTGTGGGCCAAAACCCCC  
GTTCAACCCCGACCGGTGGCCCTTTTCCCGGAAATTCGCTCTTGTTTC  
CAACCCGGGGAAAACACAATTTTACCCCTTGGGGCGACCCCTGGGG  
ACAAGTTTTTAAAAAAAAGGATTATAAAGG
